# Supplementary material for: Weighting Health-Related Estimates in the GCAT Cohort and the General Population of Catalonia
Source: Research Square preprint supplement (doi:10.21203/rs.3.rs-5219180/v1), 2025-03-24
Supplement: Supplementary file 1 [file 981bba1e0bc2b1479006f1c8.docx]

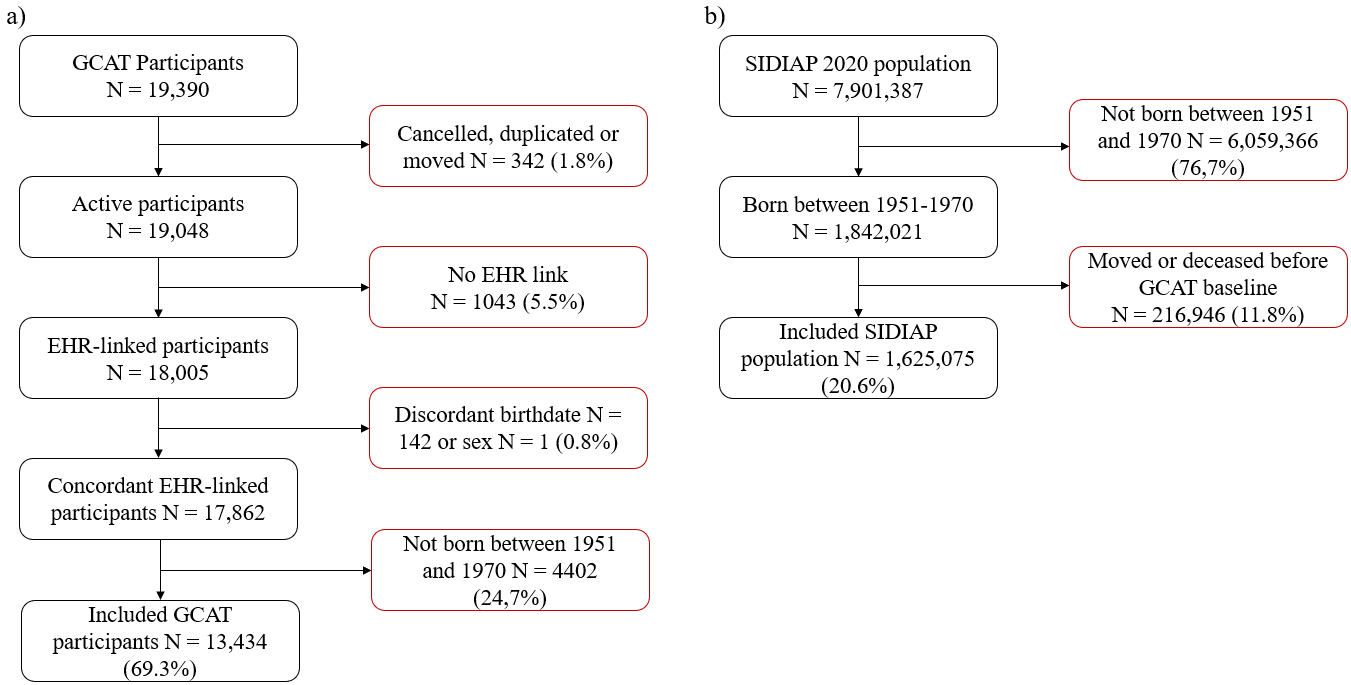


**Supplementary Figure 1**. Flowchart of the inclusion and exclusion criteria of (a) GCAT and (b) SIDIAP.


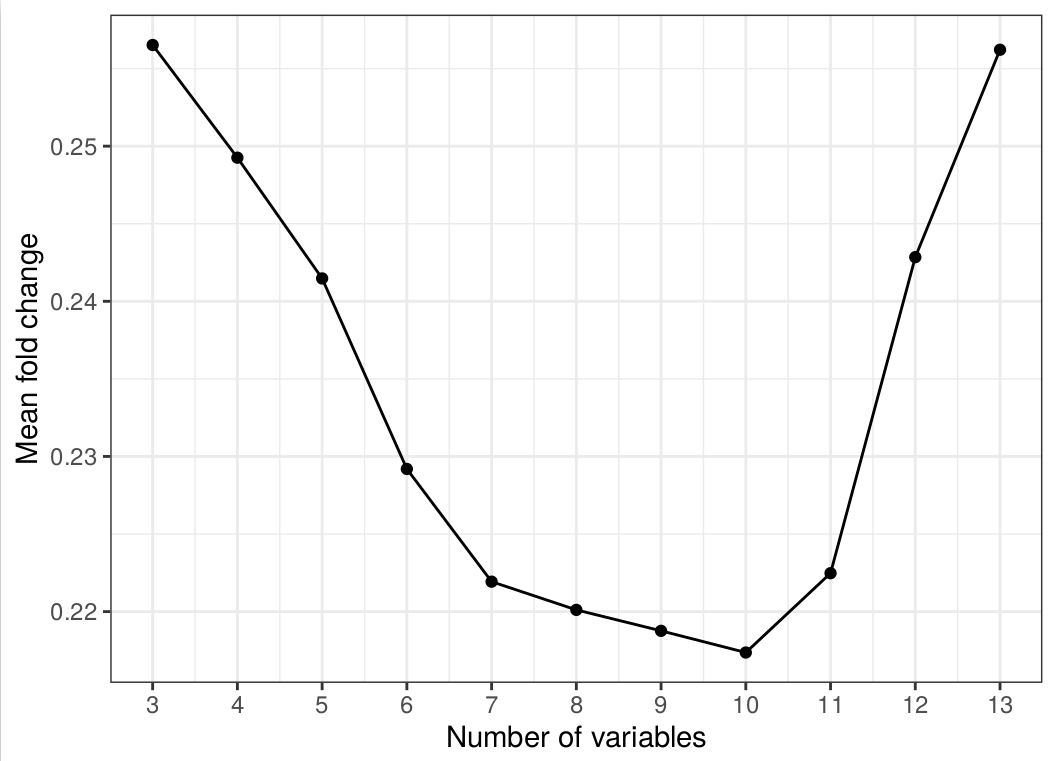


**Supplementary Figure 2**. Results of the best iteration for each number of variables included in the model. In the x-axis the number of variables used to calculate the weights, and in the y-axis the best average absolute fold change of disease prevalence between GCAT weighted and SIDIAP.
