# Supplementary material for: Weighting Health-Related Estimates in the GCAT Cohort and the General Population of Catalonia
Source: Research Square preprint supplement (doi:10.21203/rs.3.rs-5219180/v1), 2025-03-24
Supplement: Supplementary file 2 [file a7107bafde15c7679175c775.xlsx]

## Sheet: Table S1
Table S1. Description of used variables and sources, and the missing rates for the included GCAT individuals.
Domain	Variable	GCAT	General Population	Source General Population	GCAT missing rates (%)
Sociodemographic	Sex	Sex was obtained both from EHR and baseline questionnaire, excluding individuals with not matching data	Sex was obtained from EHR	SIDIAP	0
Sociodemographic	Age	Birth date was obtained both from EHR and baseline questionnaire, excluding individuals with not matching dates. Then, age at 31-12-2019 was calculated, as well as age at event	Birth date was obtained from EHR. Then age at 31-12-2019 was calculated, as well as age at event	SIDIAP	0
Sociodemographic	Deprivation index	Deprivation index of 2011 was obtained through geolocation and then converted into quintiles using the previous described cutoffs (values included in the lower category): -0.86, -0.27, 0.21, 0.82 [DOI: 10.1016/j.gaceta.2019.10.008]	Deprivation index of 2011 was obtained from EHR in quintiles	SIDIAP	1.73
Sociodemographic	Rurality	Rurality was obtained through geocoded residence address from baseline questionnaire and mapped to the Degree of Urbanisation according to Eurostat (https://ec.europa.eu/eurostat/) and grouped using the following criteria: Rural: Rural area, Urban: Town or suburb and City	Rurality was obtained from EHR and the same categories were kept	SIDIAP	1.73
Sociodemographic	Education	Education level was obtained from baseline questionnaire. Levels were grouped using the following criteria: Primary or less: No studies or Primary studies or equivalent (up to 6th EGB or primary); Secondary 1: Secondary education, 1st cycle (EGB completed or ESO); Secondary 2: 2nd degree professional education, 2nd cycle (FP1 or intermediate) or Secondary education, 2nd cycle (BUP or baccalaureat…	Education level was obtained from 2020, corresponding to the statistic of "Population aged 15 or over. By level of education attained and five year age group" (https://www.idescat.cat/pub/?id=eep&n=13826) and used age ranges from 50 to 69 matching GCAT individuals age at 2020. This data has four categories: Primary or less: Primary education or lower, Secondary 1: First stage of secondary educati…	IDESCAT	0.23
			Education level was obtained from ESCA 2015 survey. Levels were grouped using the following criteria: Primary or less: Can’t read or write, Incomplete primary school, Complete primary school; Secondary 1: First stage of secondary school; Secondary 2: High school, Intermediate level professional education; Higher: Superior level professional education, University students of intermediate degree, U…	ESCA
Sociodemographic	Employment	Employment was obtained from baseline questionnaire. Levels were grouped using the following criteria: Employed: Employed or self-employed; Unemployed: Unemployed; Inactive: Retired, I take care of the house/family, Incapacity to work, Volunteer or working without salary, Student, None of the above.	Employment was obtained from the first quarter of 2016 corresponding to the statistics: "Employed by age group, sex and autonomous community. Absolute values" (https://www.ine.es/jaxiT3/Tabla.htm?t=4211&L=0), "Unemployed by age group, sex and autonomous community. Absolute values" (https://www.ine.es/jaxiT3/Tabla.htm?t=4245&L=0) and "Resident population by date, sex and age" (https://www.ine.es/j…	INE	0.45
Sociodemographic	Occupation status	Occupation status was obtained from baseline questionnaire. Levels were grouped using the following criteria: Working: Employed or self-employed; Retired: Retired; Home duties: I take care of the house/family; Incapacity: Incapacity to work; Unemployed: Unemployed, Volunteer or working without salary, Student, None of the above.	Occupation status was obtained from ESCA 2015 survey. Levels were grouped using the following criteria: Working: Working, Working but with a medical leave; Retired: Retired by age, Early retirement; Home duties: Home duties; Incapacity: Incapacity to work; Unemployed: Unemployed with subsidy, Unemployed without subsidy, Student, Others.	ESCA	0.45
Sociodemographic	Civil status	Civil status was obtained from baseline questionnaire. Levels were grouped using the following criteria: Single: Single, Married: Married or Domestic partnership, Separated/Divorced: Divorced/Separated, Widowed: Widowed	Civil status was obtained from 2011, corresponding to the statistic of "Population. By sex, five year age group and marital status" (https://www.idescat.cat/pub/?id=censph&n=11) and used age ranges 45-64 matching GCAT individuals age at baseline. Levels were grouped using the following criteria: Single: Single, Married: Married, Separated/Divorced: Separated or Divorced, Widowed: Widowed	IDESCAT	0.16
Sociodemographic	Household size	Household size was obtained from baseline questionnaire. Households equal or bigger than 5 individuals were categorised as 5+.	Househod size was obtained from ESCA 2015 survey. The same categories were kept.	ESCA	0.16
Lifestyle habits	Smoking habit	Smoking habit was obtained from baseline questionnaire. Data was categorized using the following criteria: Smoker: smoked more than 100 cigarettes in a life time and currently smoking, Ex-smoker: smoked more than 100 cigarettes in a life time and not currently smoking and Non-smoker: smoked less than 100 cigarettes in a lifetime	Smoking habit was obtained from primary care registry (EHR), keeping the last register for each individual, up to the end of 2019. This data is categorised by the primary care physician as Smoker, Ex-smoker and Non-smoker.	SIDIAP	0.39
			Smoking habit was obtained from ESCA 2015 survey. Levels were grouped using the following criteria: Smoker: Daily smoker, Occasional smoker; Ex-smoker: Ex-smoker; Non-smoker: Non smoker	ESCA
Lifestyle habits	Alcohol consumption	Alcohol consumption was obtained from baseline questionnaire, asking for the frequency of consumption of 6 different types of alcohol (white wine, red wine, beer, cava, vermouth and liquor), computing the grams of pure alcohol per week, and then categorized following these criteria: High-risk drinkers (>= 280 g of alcohol /week for men, and >= 170 g of alcohol/week for women), Low-risk drinkers (…	Alcohol consumption was obtained from primary care registry (EHR), keeping the last register for each individual, up to the end of 2019. This data is categorised by the primary care physician using the following guidelines: High-risk drinkers (>= 280 g of alcohol /week for men, and >= 170 g of alcohol/week for women, or drinker but pregnant, working with dangerous machinery, taking any drug that …	SIDIAP	0.66
			Alcohol consumption was obtained from ESCA 2015 survey. The same categories were kept	ESCA
Health-related factors	Mortality	Death date was obtained from EHR, and age at death was computed using birth date and grouped into 5 years age range. Relative mortality for each age range was computed as the number of individuals that died in that age range divided by the total number of GCAT individuals of that age range (at the end of 2019) or older. For GCAT individuals that died during the recruitment, relative mortality was…	Death date was obtained from EHR, and age at death was computed using birth date and grouped into 5 years age range. Relative mortality for each age range was computed as the number of individuals that died in that age range divided by the total number of individuals of that age range (at the end of 2019) or older	SIDIAP	0
Health-related factors	BMI	Height and weight were measured at baseline interview by a nurse and then BMI was calculated and categorised according to WHO: Underweight: <18.5; Normal weight: >=18.5 and <25; Overweight: >=25 and <30; Obesity: >=30.	BMI was obtained from ESCA 2015 survey. The same categories were kept	ESCA	0.31
Health-related factors	Self-perceived health status	Self-perceived health status was obtained from baseline questionnaire. Levels Bad and Very bad were grouped together	Self-perceived health status was obtained from ESCA 2015 survey. Levels Bad and Very bad were grouped together	ESCA	0.12
Health-related factors	Primary care visits	The number of primary care visits per year between 2010 and 2019 with at least one diagnosis was computed using EHR diagnosis records	The number of primary care visits per year between 2010 and 2019 with at least one diagnosis was computed using EHR diagnosis records	SIDIAP	0
Health-related factors	Elixhauser Comorbidity Index	Primary care diagnosis were obtained from EHR until the end of 2019 and then computed Elixhauser Comorbidity Index using the comorbidity R package v1.0.7 (https://CRAN.R-project.org/package=comorbidity)	Primary care diagnosis were obtained from EHR until the end of 2019 and then computed Elixhauser Comorbidity Index using the comorbidity R package v1.0.7 (https://CRAN.R-project.org/package=comorbidity)	SIDIAP	0
Health-related factors	Diagnosis (selection of diseases)	Primary care diagnosis were obtained from EHR until the end of 2019. Encoded in ICD-10 and grouped into three-digits level and selected 20 diseases according to their chronicity, prevalence and/or severity The final list of 20 diseases includes: Type 2 diabetes mellitus (E11), Overweight and obesity (E66), Disorders of lipoprotein metabolism and other lipidemias (E78), Alcohol related disorders (…	Primary care diagnosis were obtained from EHR until the end of 2019. Encoded in ICD-10 and grouped into three-digits level and selected 20 diseases according to their chronicity, prevalence and/or severity The final list of 20 diseases includes: Type 2 diabetes mellitus (E11), Overweight and obesity (E66), Disorders of lipoprotein metabolism and other lipidemias (E78), Alcohol related disorders (…	SIDIAP	0
Health-related factors	Diagnosis (cancers)	Primary care diagnosis were obtained from EHR until the end of 2019. Encoded in ICD-10 and grouped into three-digits level and selected the 20 most prevalent types of cancer. The final list of cancers includes: Malignant neoplasm of stomach (C16), Malignant neoplasm of colon (C18), Malignant neoplasm of rectum (C20), Malignant neoplasm of liver and intrahepatic bile ducts (C22), Malignant neoplas…	Primary care diagnosis were obtained from EHR until the end of 2019. Encoded in ICD-10 and grouped into three-digits level and selected the 20 most prevalent types of cancer. The final list of cancers includes: Malignant neoplasm of stomach (C16), Malignant neoplasm of colon (C18), Malignant neoplasm of rectum (C20), Malignant neoplasm of liver and intrahepatic bile ducts (C22), Malignant neoplas…	SIDIAP	0
Medication	Drug use prevalence	Drugs dispensed at the pharmacy were obtained from EHR from 2012-2019. Encoded in ATC and grouped into three-digits level. The final list of drugs includes A02:Drugs for acid related disorders, A03:Drugs for functional gastrointestinal disorders, A07:Antidiarrheals, intestinal antiinflammatory/antiinfective agents, A10:Drugs used in diabetes, A11:Vitamins, A12:Mineral supplements, B01:Antithrombo…	Drugs dispensed at the pharmacy were obtained from EHR from 2012-2019. Encoded in ATC and grouped into three-digits level. The final list of drugs includes A02:Drugs for acid related disorders, A03:Drugs for functional gastrointestinal disorders, A07:Antidiarrheals, intestinal antiinflammatory/antiinfective agents, A10:Drugs used in diabetes, A11:Vitamins, A12:Mineral supplements, B01:Antithrombo…	SIDIAP	0
Medication	Drug prescriptions per person	The total number of prescriptions by drug was computed for each individual using EHR pharmacy records	The total number of prescriptions by drug was computed for each individual using EHR pharmacy records	SIDIAP	0

## Sheet: Table S2
Table S2. Results from all possible variable combinations to select the best weighting model. Mean fold change depicts the average absolute difference between GCAT weighted and SIDIAP disease prevalence. Best model is indicated with an asterisk.
Number of variables	Selected variables	Number of individuals	Mean fold change	Best model
3	sex, birth_range, deprivation_index	13202	0.288698
3	sex, birth_range, rurality	13202	0.275986
3	sex, birth_range, education_idescat	13403	0.278003
3	sex, birth_range, education_esca	13403	0.269137
3	sex, birth_range, civil_status	13413	0.267908
3	sex, birth_range, employment	13373	0.266861
3	sex, birth_range, occupation_status	13373	0.262509
3	sex, birth_range, smoking_sidiap	13381	0.258812
3	sex, birth_range, smoking_esca	13381	0.260164
3	sex, birth_range, household_size	13413	0.268274
3	sex, birth_range, health_status	13418	0.256522
3	sex, birth_range, bmi	13393	0.304739
3	sex, birth_range, pc_visits	13434	0.283116
3	sex, birth_range, elixhauser_cat	13434	0.269547
4	sex, birth_range, deprivation_index, rurality	13202	0.294415
4	sex, birth_range, deprivation_index, education_idescat	13171	0.294077
4	sex, birth_range, deprivation_index, education_esca	13171	0.289947
4	sex, birth_range, deprivation_index, civil_status	13181	0.289798
4	sex, birth_range, deprivation_index, employment	13141	0.289623
4	sex, birth_range, deprivation_index, occupation_status	13141	0.284156
4	sex, birth_range, deprivation_index, smoking_sidiap	13150	0.279244
4	sex, birth_range, deprivation_index, smoking_esca	13150	0.279138
4	sex, birth_range, deprivation_index, household_size	13182	0.288639
4	sex, birth_range, deprivation_index, health_status	13186	0.293982
4	sex, birth_range, deprivation_index, bmi	13162	0.308202
4	sex, birth_range, deprivation_index, pc_visits	13202	0.283239
4	sex, birth_range, deprivation_index, elixhauser_cat	13202	0.2908
4	sex, birth_range, rurality, education_idescat	13171	0.285044
4	sex, birth_range, rurality, education_esca	13171	0.274977
4	sex, birth_range, rurality, civil_status	13181	0.275724
4	sex, birth_range, rurality, employment	13141	0.274648
4	sex, birth_range, rurality, occupation_status	13141	0.267762
4	sex, birth_range, rurality, smoking_sidiap	13150	0.263469
4	sex, birth_range, rurality, smoking_esca	13150	0.263708
4	sex, birth_range, rurality, household_size	13182	0.275738
4	sex, birth_range, rurality, health_status	13186	0.262114
4	sex, birth_range, rurality, bmi	13162	0.308537
4	sex, birth_range, rurality, pc_visits	13202	0.288543
4	sex, birth_range, rurality, elixhauser_cat	13202	0.275928
4	sex, birth_range, education_idescat, civil_status	13383	0.274475
4	sex, birth_range, education_idescat, employment	13343	0.280153
4	sex, birth_range, education_idescat, occupation_status	13343	0.281035
4	sex, birth_range, education_idescat, smoking_sidiap	13352	0.262899
4	sex, birth_range, education_idescat, smoking_esca	13352	0.261543
4	sex, birth_range, education_idescat, household_size	13383	0.278719
4	sex, birth_range, education_idescat, health_status	13387	0.269868
4	sex, birth_range, education_idescat, bmi	13362	0.303981
4	sex, birth_range, education_idescat, pc_visits	13403	0.281763
4	sex, birth_range, education_idescat, elixhauser_cat	13403	0.287243
4	sex, birth_range, education_esca, civil_status	13383	0.266314
4	sex, birth_range, education_esca, employment	13343	0.269722
4	sex, birth_range, education_esca, occupation_status	13343	0.263269
4	sex, birth_range, education_esca, smoking_sidiap	13352	0.259269
4	sex, birth_range, education_esca, smoking_esca	13352	0.258949
4	sex, birth_range, education_esca, household_size	13383	0.269359
4	sex, birth_range, education_esca, health_status	13387	0.265362
4	sex, birth_range, education_esca, bmi	13362	0.289875
4	sex, birth_range, education_esca, pc_visits	13403	0.2681
4	sex, birth_range, education_esca, elixhauser_cat	13403	0.272914
4	sex, birth_range, civil_status, employment	13354	0.266674
4	sex, birth_range, civil_status, occupation_status	13354	0.263244
4	sex, birth_range, civil_status, smoking_sidiap	13360	0.25841
4	sex, birth_range, civil_status, smoking_esca	13360	0.260333
4	sex, birth_range, civil_status, household_size	13394	0.268892
4	sex, birth_range, civil_status, health_status	13397	0.257667
4	sex, birth_range, civil_status, bmi	13372	0.304308
4	sex, birth_range, civil_status, pc_visits	13413	0.279743
4	sex, birth_range, civil_status, elixhauser_cat	13413	0.269253
4	sex, birth_range, employment, smoking_sidiap	13323	0.259205
4	sex, birth_range, employment, smoking_esca	13323	0.260337
4	sex, birth_range, employment, household_size	13353	0.266295
4	sex, birth_range, employment, health_status	13359	0.259738
4	sex, birth_range, employment, bmi	13332	0.29849
4	sex, birth_range, employment, pc_visits	13373	0.276663
4	sex, birth_range, employment, elixhauser_cat	13373	0.27118
4	sex, birth_range, occupation_status, smoking_sidiap	13323	0.259397
4	sex, birth_range, occupation_status, smoking_esca	13323	0.260704
4	sex, birth_range, occupation_status, household_size	13353	0.260714
4	sex, birth_range, occupation_status, health_status	13359	0.259218
4	sex, birth_range, occupation_status, bmi	13332	0.283118
4	sex, birth_range, occupation_status, pc_visits	13373	0.25676
4	sex, birth_range, occupation_status, elixhauser_cat	13373	0.268133
4	sex, birth_range, smoking_sidiap, household_size	13360	0.258601
4	sex, birth_range, smoking_sidiap, health_status	13366	0.251637
4	sex, birth_range, smoking_sidiap, bmi	13340	0.297117
4	sex, birth_range, smoking_sidiap, pc_visits	13381	0.272855
4	sex, birth_range, smoking_sidiap, elixhauser_cat	13381	0.263152
4	sex, birth_range, smoking_esca, household_size	13360	0.259946
4	sex, birth_range, smoking_esca, health_status	13366	0.253324
4	sex, birth_range, smoking_esca, bmi	13340	0.29816
4	sex, birth_range, smoking_esca, pc_visits	13381	0.274718
4	sex, birth_range, smoking_esca, elixhauser_cat	13381	0.264354
4	sex, birth_range, household_size, health_status	13398	0.256825
4	sex, birth_range, household_size, bmi	13372	0.306103
4	sex, birth_range, household_size, pc_visits	13413	0.28349
4	sex, birth_range, household_size, elixhauser_cat	13413	0.269367
4	sex, birth_range, health_status, bmi	13377	0.285172
4	sex, birth_range, health_status, pc_visits	13418	0.249257
4	sex, birth_range, health_status, elixhauser_cat	13418	0.260605
4	sex, birth_range, bmi, pc_visits	13393	0.312576
4	sex, birth_range, bmi, elixhauser_cat	13393	0.28393
4	sex, birth_range, pc_visits, elixhauser_cat	13434	0.260065
5	sex, birth_range, deprivation_index, rurality, education_idescat	13171	0.299193
5	sex, birth_range, deprivation_index, rurality, education_esca	13171	0.296974
5	sex, birth_range, deprivation_index, rurality, civil_status	13181	0.295451
5	sex, birth_range, deprivation_index, rurality, employment	13141	0.296046
5	sex, birth_range, deprivation_index, rurality, occupation_status	13141	0.290624
5	sex, birth_range, deprivation_index, rurality, smoking_sidiap	13150	0.284855
5	sex, birth_range, deprivation_index, rurality, smoking_esca	13150	0.284595
5	sex, birth_range, deprivation_index, rurality, household_size	13182	0.293827
5	sex, birth_range, deprivation_index, rurality, health_status	13186	0.299336
5	sex, birth_range, deprivation_index, rurality, bmi	13162	0.313912
5	sex, birth_range, deprivation_index, rurality, pc_visits	13202	0.29187
5	sex, birth_range, deprivation_index, rurality, elixhauser_cat	13202	0.29652
5	sex, birth_range, deprivation_index, education_idescat, civil_status	13151	0.291735
5	sex, birth_range, deprivation_index, education_idescat, employment	13111	0.295335
5	sex, birth_range, deprivation_index, education_idescat, occupation_status	13111	0.29283
5	sex, birth_range, deprivation_index, education_idescat, smoking_sidiap	13121	0.281397
5	sex, birth_range, deprivation_index, education_idescat, smoking_esca	13121	0.282119
5	sex, birth_range, deprivation_index, education_idescat, household_size	13152	0.29691
5	sex, birth_range, deprivation_index, education_idescat, health_status	13155	0.299709
5	sex, birth_range, deprivation_index, education_idescat, bmi	13131	0.312333
5	sex, birth_range, deprivation_index, education_idescat, pc_visits	13171	0.290843
5	sex, birth_range, deprivation_index, education_idescat, elixhauser_cat	13171	0.299057
5	sex, birth_range, deprivation_index, education_esca, civil_status	13151	0.289081
5	sex, birth_range, deprivation_index, education_esca, employment	13111	0.28992
5	sex, birth_range, deprivation_index, education_esca, occupation_status	13111	0.284337
5	sex, birth_range, deprivation_index, education_esca, smoking_sidiap	13121	0.278767
5	sex, birth_range, deprivation_index, education_esca, smoking_esca	13121	0.278091
5	sex, birth_range, deprivation_index, education_esca, household_size	13152	0.291241
5	sex, birth_range, deprivation_index, education_esca, health_status	13155	0.2923
5	sex, birth_range, deprivation_index, education_esca, bmi	13131	0.306333
5	sex, birth_range, deprivation_index, education_esca, pc_visits	13171	0.280329
5	sex, birth_range, deprivation_index, education_esca, elixhauser_cat	13171	0.291467
5	sex, birth_range, deprivation_index, civil_status, employment	13122	0.290762
5	sex, birth_range, deprivation_index, civil_status, occupation_status	13122	0.285885
5	sex, birth_range, deprivation_index, civil_status, smoking_sidiap	13129	0.28069
5	sex, birth_range, deprivation_index, civil_status, smoking_esca	13129	0.28074
5	sex, birth_range, deprivation_index, civil_status, household_size	13163	0.289045
5	sex, birth_range, deprivation_index, civil_status, health_status	13165	0.294597
5	sex, birth_range, deprivation_index, civil_status, bmi	13141	0.309995
5	sex, birth_range, deprivation_index, civil_status, pc_visits	13181	0.28455
5	sex, birth_range, deprivation_index, civil_status, elixhauser_cat	13181	0.291498
5	sex, birth_range, deprivation_index, employment, smoking_sidiap	13092	0.279958
5	sex, birth_range, deprivation_index, employment, smoking_esca	13092	0.279826
5	sex, birth_range, deprivation_index, employment, household_size	13122	0.289752
5	sex, birth_range, deprivation_index, employment, health_status	13127	0.294084
5	sex, birth_range, deprivation_index, employment, bmi	13101	0.308999
5	sex, birth_range, deprivation_index, employment, pc_visits	13141	0.280149
5	sex, birth_range, deprivation_index, employment, elixhauser_cat	13141	0.291321
5	sex, birth_range, deprivation_index, occupation_status, smoking_sidiap	13092	0.27621
5	sex, birth_range, deprivation_index, occupation_status, smoking_esca	13092	0.275981
5	sex, birth_range, deprivation_index, occupation_status, household_size	13122	0.284027
5	sex, birth_range, deprivation_index, occupation_status, health_status	13127	0.282111
5	sex, birth_range, deprivation_index, occupation_status, bmi	13101	0.30049
5	sex, birth_range, deprivation_index, occupation_status, pc_visits	13141	0.262923
5	sex, birth_range, deprivation_index, occupation_status, elixhauser_cat	13141	0.284857
5	sex, birth_range, deprivation_index, smoking_sidiap, household_size	13130	0.279332
5	sex, birth_range, deprivation_index, smoking_sidiap, health_status	13135	0.283596
5	sex, birth_range, deprivation_index, smoking_sidiap, bmi	13110	0.301197
5	sex, birth_range, deprivation_index, smoking_sidiap, pc_visits	13150	0.272429
5	sex, birth_range, deprivation_index, smoking_sidiap, elixhauser_cat	13150	0.282276
5	sex, birth_range, deprivation_index, smoking_esca, household_size	13130	0.27931
5	sex, birth_range, deprivation_index, smoking_esca, health_status	13135	0.283808
5	sex, birth_range, deprivation_index, smoking_esca, bmi	13110	0.301846
5	sex, birth_range, deprivation_index, smoking_esca, pc_visits	13150	0.27272
5	sex, birth_range, deprivation_index, smoking_esca, elixhauser_cat	13150	0.282696
5	sex, birth_range, deprivation_index, household_size, health_status	13167	0.294523
5	sex, birth_range, deprivation_index, household_size, bmi	13142	0.307664
5	sex, birth_range, deprivation_index, household_size, pc_visits	13182	0.287229
5	sex, birth_range, deprivation_index, household_size, elixhauser_cat	13182	0.291463
5	sex, birth_range, deprivation_index, health_status, bmi	13146	0.309219
5	sex, birth_range, deprivation_index, health_status, pc_visits	13186	0.264891
5	sex, birth_range, deprivation_index, health_status, elixhauser_cat	13186	0.292013
5	sex, birth_range, deprivation_index, bmi, pc_visits	13162	0.322485
5	sex, birth_range, deprivation_index, bmi, elixhauser_cat	13162	0.30843
5	sex, birth_range, deprivation_index, pc_visits, elixhauser_cat	13202	0.276739
5	sex, birth_range, rurality, education_idescat, civil_status	13151	0.280143
5	sex, birth_range, rurality, education_idescat, employment	13111	0.28631
5	sex, birth_range, rurality, education_idescat, occupation_status	13111	0.28761
5	sex, birth_range, rurality, education_idescat, smoking_sidiap	13121	0.265471
5	sex, birth_range, rurality, education_idescat, smoking_esca	13121	0.263817
5	sex, birth_range, rurality, education_idescat, household_size	13152	0.285369
5	sex, birth_range, rurality, education_idescat, health_status	13155	0.275652
5	sex, birth_range, rurality, education_idescat, bmi	13131	0.310674
5	sex, birth_range, rurality, education_idescat, pc_visits	13171	0.28769
5	sex, birth_range, rurality, education_idescat, elixhauser_cat	13171	0.292721
5	sex, birth_range, rurality, education_esca, civil_status	13151	0.272157
5	sex, birth_range, rurality, education_esca, employment	13111	0.275586
5	sex, birth_range, rurality, education_esca, occupation_status	13111	0.268312
5	sex, birth_range, rurality, education_esca, smoking_sidiap	13121	0.262161
5	sex, birth_range, rurality, education_esca, smoking_esca	13121	0.260909
5	sex, birth_range, rurality, education_esca, household_size	13152	0.275193
5	sex, birth_range, rurality, education_esca, health_status	13155	0.271535
5	sex, birth_range, rurality, education_esca, bmi	13131	0.29757
5	sex, birth_range, rurality, education_esca, pc_visits	13171	0.27808
5	sex, birth_range, rurality, education_esca, elixhauser_cat	13171	0.278246
5	sex, birth_range, rurality, civil_status, employment	13122	0.273843
5	sex, birth_range, rurality, civil_status, occupation_status	13122	0.268406
5	sex, birth_range, rurality, civil_status, smoking_sidiap	13129	0.262853
5	sex, birth_range, rurality, civil_status, smoking_esca	13129	0.262866
5	sex, birth_range, rurality, civil_status, household_size	13163	0.276708
5	sex, birth_range, rurality, civil_status, health_status	13165	0.263012
5	sex, birth_range, rurality, civil_status, bmi	13141	0.307579
5	sex, birth_range, rurality, civil_status, pc_visits	13181	0.286376
5	sex, birth_range, rurality, civil_status, elixhauser_cat	13181	0.275208
5	sex, birth_range, rurality, employment, smoking_sidiap	13092	0.26329
5	sex, birth_range, rurality, employment, smoking_esca	13092	0.263146
5	sex, birth_range, rurality, employment, household_size	13122	0.274294
5	sex, birth_range, rurality, employment, health_status	13127	0.264756
5	sex, birth_range, rurality, employment, bmi	13101	0.304011
5	sex, birth_range, rurality, employment, pc_visits	13141	0.283637
5	sex, birth_range, rurality, employment, elixhauser_cat	13141	0.277361
5	sex, birth_range, rurality, occupation_status, smoking_sidiap	13092	0.263172
5	sex, birth_range, rurality, occupation_status, smoking_esca	13092	0.263762
5	sex, birth_range, rurality, occupation_status, household_size	13122	0.266049
5	sex, birth_range, rurality, occupation_status, health_status	13127	0.263919
5	sex, birth_range, rurality, occupation_status, bmi	13101	0.288796
5	sex, birth_range, rurality, occupation_status, pc_visits	13141	0.261454
5	sex, birth_range, rurality, occupation_status, elixhauser_cat	13141	0.273296
5	sex, birth_range, rurality, smoking_sidiap, household_size	13130	0.262482
5	sex, birth_range, rurality, smoking_sidiap, health_status	13135	0.255496
5	sex, birth_range, rurality, smoking_sidiap, bmi	13110	0.297839
5	sex, birth_range, rurality, smoking_sidiap, pc_visits	13150	0.276867
5	sex, birth_range, rurality, smoking_sidiap, elixhauser_cat	13150	0.266236
5	sex, birth_range, rurality, smoking_esca, household_size	13130	0.26244
5	sex, birth_range, rurality, smoking_esca, health_status	13135	0.256471
5	sex, birth_range, rurality, smoking_esca, bmi	13110	0.298094
5	sex, birth_range, rurality, smoking_esca, pc_visits	13150	0.277913
5	sex, birth_range, rurality, smoking_esca, elixhauser_cat	13150	0.266621
5	sex, birth_range, rurality, household_size, health_status	13167	0.262374
5	sex, birth_range, rurality, household_size, bmi	13142	0.309846
5	sex, birth_range, rurality, household_size, pc_visits	13182	0.288993
5	sex, birth_range, rurality, household_size, elixhauser_cat	13182	0.275588
5	sex, birth_range, rurality, health_status, bmi	13146	0.292228
5	sex, birth_range, rurality, health_status, pc_visits	13186	0.252986
5	sex, birth_range, rurality, health_status, elixhauser_cat	13186	0.265848
5	sex, birth_range, rurality, bmi, pc_visits	13162	0.318429
5	sex, birth_range, rurality, bmi, elixhauser_cat	13162	0.291216
5	sex, birth_range, rurality, pc_visits, elixhauser_cat	13202	0.268426
5	sex, birth_range, education_idescat, civil_status, employment	13325	0.276549
5	sex, birth_range, education_idescat, civil_status, occupation_status	13325	0.277339
5	sex, birth_range, education_idescat, civil_status, smoking_sidiap	13332	0.26132
5	sex, birth_range, education_idescat, civil_status, smoking_esca	13332	0.260332
5	sex, birth_range, education_idescat, civil_status, household_size	13365	0.275486
5	sex, birth_range, education_idescat, civil_status, health_status	13367	0.269323
5	sex, birth_range, education_idescat, civil_status, bmi	13342	0.300111
5	sex, birth_range, education_idescat, civil_status, pc_visits	13383	0.276696
5	sex, birth_range, education_idescat, civil_status, elixhauser_cat	13383	0.282165
5	sex, birth_range, education_idescat, employment, smoking_sidiap	13295	0.264659
5	sex, birth_range, education_idescat, employment, smoking_esca	13295	0.263021
5	sex, birth_range, education_idescat, employment, household_size	13324	0.280531
5	sex, birth_range, education_idescat, employment, health_status	13329	0.270461
5	sex, birth_range, education_idescat, employment, bmi	13302	0.303188
5	sex, birth_range, education_idescat, employment, pc_visits	13343	0.281129
5	sex, birth_range, education_idescat, employment, elixhauser_cat	13343	0.288766
5	sex, birth_range, education_idescat, occupation_status, smoking_sidiap	13295	0.272311
5	sex, birth_range, education_idescat, occupation_status, smoking_esca	13295	0.271323
5	sex, birth_range, education_idescat, occupation_status, household_size	13324	0.280737
5	sex, birth_range, education_idescat, occupation_status, health_status	13329	0.268364
5	sex, birth_range, education_idescat, occupation_status, bmi	13302	0.302134
5	sex, birth_range, education_idescat, occupation_status, pc_visits	13343	0.26847
5	sex, birth_range, education_idescat, occupation_status, elixhauser_cat	13343	0.288925
5	sex, birth_range, education_idescat, smoking_sidiap, household_size	13332	0.264692
5	sex, birth_range, education_idescat, smoking_sidiap, health_status	13337	0.25778
5	sex, birth_range, education_idescat, smoking_sidiap, bmi	13311	0.29264
5	sex, birth_range, education_idescat, smoking_sidiap, pc_visits	13352	0.270762
5	sex, birth_range, education_idescat, smoking_sidiap, elixhauser_cat	13352	0.273391
5	sex, birth_range, education_idescat, smoking_esca, household_size	13332	0.263275
5	sex, birth_range, education_idescat, smoking_esca, health_status	13337	0.256847
5	sex, birth_range, education_idescat, smoking_esca, bmi	13311	0.293065
5	sex, birth_range, education_idescat, smoking_esca, pc_visits	13352	0.271311
5	sex, birth_range, education_idescat, smoking_esca, elixhauser_cat	13352	0.272346
5	sex, birth_range, education_idescat, household_size, health_status	13368	0.271466
5	sex, birth_range, education_idescat, household_size, bmi	13342	0.305591
5	sex, birth_range, education_idescat, household_size, pc_visits	13383	0.283396
5	sex, birth_range, education_idescat, household_size, elixhauser_cat	13383	0.288268
5	sex, birth_range, education_idescat, health_status, bmi	13346	0.292813
5	sex, birth_range, education_idescat, health_status, pc_visits	13387	0.245232
5	sex, birth_range, education_idescat, health_status, elixhauser_cat	13387	0.272043
5	sex, birth_range, education_idescat, bmi, pc_visits	13362	0.316113
5	sex, birth_range, education_idescat, bmi, elixhauser_cat	13362	0.30147
5	sex, birth_range, education_idescat, pc_visits, elixhauser_cat	13403	0.266308
5	sex, birth_range, education_esca, civil_status, employment	13325	0.266914
5	sex, birth_range, education_esca, civil_status, occupation_status	13325	0.260552
5	sex, birth_range, education_esca, civil_status, smoking_sidiap	13332	0.258021
5	sex, birth_range, education_esca, civil_status, smoking_esca	13332	0.258024
5	sex, birth_range, education_esca, civil_status, household_size	13365	0.265637
5	sex, birth_range, education_esca, civil_status, health_status	13367	0.263685
5	sex, birth_range, education_esca, civil_status, bmi	13342	0.286643
5	sex, birth_range, education_esca, civil_status, pc_visits	13383	0.264408
5	sex, birth_range, education_esca, civil_status, elixhauser_cat	13383	0.269179
5	sex, birth_range, education_esca, employment, smoking_sidiap	13295	0.259681
5	sex, birth_range, education_esca, employment, smoking_esca	13295	0.259282
5	sex, birth_range, education_esca, employment, household_size	13324	0.269528
5	sex, birth_range, education_esca, employment, health_status	13329	0.265209
5	sex, birth_range, education_esca, employment, bmi	13302	0.290064
5	sex, birth_range, education_esca, employment, pc_visits	13343	0.264892
5	sex, birth_range, education_esca, employment, elixhauser_cat	13343	0.273052
5	sex, birth_range, education_esca, occupation_status, smoking_sidiap	13295	0.257462
5	sex, birth_range, education_esca, occupation_status, smoking_esca	13295	0.258152
5	sex, birth_range, education_esca, occupation_status, household_size	13324	0.262112
5	sex, birth_range, education_esca, occupation_status, health_status	13329	0.261126
5	sex, birth_range, education_esca, occupation_status, bmi	13302	0.283044
5	sex, birth_range, education_esca, occupation_status, pc_visits	13343	0.247427
5	sex, birth_range, education_esca, occupation_status, elixhauser_cat	13343	0.266689
5	sex, birth_range, education_esca, smoking_sidiap, household_size	13332	0.258967
5	sex, birth_range, education_esca, smoking_sidiap, health_status	13337	0.254686
5	sex, birth_range, education_esca, smoking_sidiap, bmi	13311	0.280898
5	sex, birth_range, education_esca, smoking_sidiap, pc_visits	13352	0.259707
5	sex, birth_range, education_esca, smoking_sidiap, elixhauser_cat	13352	0.264559
5	sex, birth_range, education_esca, smoking_esca, household_size	13332	0.258524
5	sex, birth_range, education_esca, smoking_esca, health_status	13337	0.254747
5	sex, birth_range, education_esca, smoking_esca, bmi	13311	0.281783
5	sex, birth_range, education_esca, smoking_esca, pc_visits	13352	0.261205
5	sex, birth_range, education_esca, smoking_esca, elixhauser_cat	13352	0.26494
5	sex, birth_range, education_esca, household_size, health_status	13368	0.267077
5	sex, birth_range, education_esca, household_size, bmi	13342	0.289828
5	sex, birth_range, education_esca, household_size, pc_visits	13383	0.268471
5	sex, birth_range, education_esca, household_size, elixhauser_cat	13383	0.273389
5	sex, birth_range, education_esca, health_status, bmi	13346	0.285682
5	sex, birth_range, education_esca, health_status, pc_visits	13387	0.241893
5	sex, birth_range, education_esca, health_status, elixhauser_cat	13387	0.26691
5	sex, birth_range, education_esca, bmi, pc_visits	13362	0.305566
5	sex, birth_range, education_esca, bmi, elixhauser_cat	13362	0.290004
5	sex, birth_range, education_esca, pc_visits, elixhauser_cat	13403	0.255832
5	sex, birth_range, civil_status, employment, smoking_sidiap	13304	0.259719
5	sex, birth_range, civil_status, employment, smoking_esca	13304	0.260378
5	sex, birth_range, civil_status, employment, household_size	13336	0.265924
5	sex, birth_range, civil_status, employment, health_status	13340	0.260232
5	sex, birth_range, civil_status, employment, bmi	13313	0.299038
5	sex, birth_range, civil_status, employment, pc_visits	13354	0.275113
5	sex, birth_range, civil_status, employment, elixhauser_cat	13354	0.271061
5	sex, birth_range, civil_status, occupation_status, smoking_sidiap	13304	0.260656
5	sex, birth_range, civil_status, occupation_status, smoking_esca	13304	0.262153
5	sex, birth_range, civil_status, occupation_status, household_size	13336	0.261431
5	sex, birth_range, civil_status, occupation_status, health_status	13340	0.259587
5	sex, birth_range, civil_status, occupation_status, bmi	13313	0.284102
5	sex, birth_range, civil_status, occupation_status, pc_visits	13354	0.257256
5	sex, birth_range, civil_status, occupation_status, elixhauser_cat	13354	0.268285
5	sex, birth_range, civil_status, smoking_sidiap, household_size	13341	0.256998
5	sex, birth_range, civil_status, smoking_sidiap, health_status	13345	0.252416
5	sex, birth_range, civil_status, smoking_sidiap, bmi	13319	0.297327
5	sex, birth_range, civil_status, smoking_sidiap, pc_visits	13360	0.269938
5	sex, birth_range, civil_status, smoking_sidiap, elixhauser_cat	13360	0.264201
5	sex, birth_range, civil_status, smoking_esca, household_size	13341	0.259445
5	sex, birth_range, civil_status, smoking_esca, health_status	13345	0.253694
5	sex, birth_range, civil_status, smoking_esca, bmi	13319	0.29857
5	sex, birth_range, civil_status, smoking_esca, pc_visits	13360	0.272117
5	sex, birth_range, civil_status, smoking_esca, elixhauser_cat	13360	0.265828
5	sex, birth_range, civil_status, household_size, health_status	13379	0.257936
5	sex, birth_range, civil_status, household_size, bmi	13353	0.306648
5	sex, birth_range, civil_status, household_size, pc_visits	13394	0.28139
5	sex, birth_range, civil_status, household_size, elixhauser_cat	13394	0.26849
5	sex, birth_range, civil_status, health_status, bmi	13356	0.28658
5	sex, birth_range, civil_status, health_status, pc_visits	13397	0.250095
5	sex, birth_range, civil_status, health_status, elixhauser_cat	13397	0.261359
5	sex, birth_range, civil_status, bmi, pc_visits	13372	0.311936
5	sex, birth_range, civil_status, bmi, elixhauser_cat	13372	0.284202
5	sex, birth_range, civil_status, pc_visits, elixhauser_cat	13413	0.261966
5	sex, birth_range, employment, smoking_sidiap, household_size	13303	0.257866
5	sex, birth_range, employment, smoking_sidiap, health_status	13310	0.2528
5	sex, birth_range, employment, smoking_sidiap, bmi	13282	0.292541
5	sex, birth_range, employment, smoking_sidiap, pc_visits	13323	0.267331
5	sex, birth_range, employment, smoking_sidiap, elixhauser_cat	13323	0.264965
5	sex, birth_range, employment, smoking_esca, household_size	13303	0.258854
5	sex, birth_range, employment, smoking_esca, health_status	13310	0.254464
5	sex, birth_range, employment, smoking_esca, bmi	13282	0.293767
5	sex, birth_range, employment, smoking_esca, pc_visits	13323	0.269015
5	sex, birth_range, employment, smoking_esca, elixhauser_cat	13323	0.266121
5	sex, birth_range, employment, household_size, health_status	13340	0.259353
5	sex, birth_range, employment, household_size, bmi	13312	0.299523
5	sex, birth_range, employment, household_size, pc_visits	13353	0.276187
5	sex, birth_range, employment, household_size, elixhauser_cat	13353	0.270821
5	sex, birth_range, employment, health_status, bmi	13318	0.286826
5	sex, birth_range, employment, health_status, pc_visits	13359	0.248387
5	sex, birth_range, employment, health_status, elixhauser_cat	13359	0.26334
5	sex, birth_range, employment, bmi, pc_visits	13332	0.309137
5	sex, birth_range, employment, bmi, elixhauser_cat	13332	0.286807
5	sex, birth_range, employment, pc_visits, elixhauser_cat	13373	0.259847
5	sex, birth_range, occupation_status, smoking_sidiap, household_size	13303	0.257449
5	sex, birth_range, occupation_status, smoking_sidiap, health_status	13310	0.252441
5	sex, birth_range, occupation_status, smoking_sidiap, bmi	13282	0.283005
5	sex, birth_range, occupation_status, smoking_sidiap, pc_visits	13323	0.250345
5	sex, birth_range, occupation_status, smoking_sidiap, elixhauser_cat	13323	0.265695
5	sex, birth_range, occupation_status, smoking_esca, household_size	13303	0.25867
5	sex, birth_range, occupation_status, smoking_esca, health_status	13310	0.252356
5	sex, birth_range, occupation_status, smoking_esca, bmi	13282	0.285798
5	sex, birth_range, occupation_status, smoking_esca, pc_visits	13323	0.251438
5	sex, birth_range, occupation_status, smoking_esca, elixhauser_cat	13323	0.267686
5	sex, birth_range, occupation_status, household_size, health_status	13340	0.259102
5	sex, birth_range, occupation_status, household_size, bmi	13312	0.281258
5	sex, birth_range, occupation_status, household_size, pc_visits	13353	0.254971
5	sex, birth_range, occupation_status, household_size, elixhauser_cat	13353	0.266858
5	sex, birth_range, occupation_status, health_status, bmi	13318	0.276773
5	sex, birth_range, occupation_status, health_status, pc_visits	13359	0.241969
5	sex, birth_range, occupation_status, health_status, elixhauser_cat	13359	0.264187
5	sex, birth_range, occupation_status, bmi, pc_visits	13332	0.28749
5	sex, birth_range, occupation_status, bmi, elixhauser_cat	13332	0.283779
5	sex, birth_range, occupation_status, pc_visits, elixhauser_cat	13373	0.250359
5	sex, birth_range, smoking_sidiap, household_size, health_status	13346	0.25039
5	sex, birth_range, smoking_sidiap, household_size, bmi	13319	0.298632
5	sex, birth_range, smoking_sidiap, household_size, pc_visits	13360	0.273728
5	sex, birth_range, smoking_sidiap, household_size, elixhauser_cat	13360	0.262471
5	sex, birth_range, smoking_sidiap, health_status, bmi	13325	0.281897
5	sex, birth_range, smoking_sidiap, health_status, pc_visits	13366	0.24211
5	sex, birth_range, smoking_sidiap, health_status, elixhauser_cat	13366	0.254068
5	sex, birth_range, smoking_sidiap, bmi, pc_visits	13340	0.304188
5	sex, birth_range, smoking_sidiap, bmi, elixhauser_cat	13340	0.277772
5	sex, birth_range, smoking_sidiap, pc_visits, elixhauser_cat	13381	0.248885
5	sex, birth_range, smoking_esca, household_size, health_status	13346	0.251891
5	sex, birth_range, smoking_esca, household_size, bmi	13319	0.299649
5	sex, birth_range, smoking_esca, household_size, pc_visits	13360	0.275609
5	sex, birth_range, smoking_esca, household_size, elixhauser_cat	13360	0.263614
5	sex, birth_range, smoking_esca, health_status, bmi	13325	0.282257
5	sex, birth_range, smoking_esca, health_status, pc_visits	13366	0.243545
5	sex, birth_range, smoking_esca, health_status, elixhauser_cat	13366	0.256513
5	sex, birth_range, smoking_esca, bmi, pc_visits	13340	0.304784
5	sex, birth_range, smoking_esca, bmi, elixhauser_cat	13340	0.278071
5	sex, birth_range, smoking_esca, pc_visits, elixhauser_cat	13381	0.249419
5	sex, birth_range, household_size, health_status, bmi	13357	0.283719
5	sex, birth_range, household_size, health_status, pc_visits	13398	0.246411
5	sex, birth_range, household_size, health_status, elixhauser_cat	13398	0.261593
5	sex, birth_range, household_size, bmi, pc_visits	13372	0.313558
5	sex, birth_range, household_size, bmi, elixhauser_cat	13372	0.283904
5	sex, birth_range, household_size, pc_visits, elixhauser_cat	13413	0.260355
5	sex, birth_range, health_status, bmi, pc_visits	13377	0.282564
5	sex, birth_range, health_status, bmi, elixhauser_cat	13377	0.281155
5	sex, birth_range, health_status, pc_visits, elixhauser_cat	13418	0.241474
5	sex, birth_range, bmi, pc_visits, elixhauser_cat	13393	0.272733
6	sex, birth_range, deprivation_index, rurality, education_idescat, civil_status	13151	0.296783
6	sex, birth_range, deprivation_index, rurality, education_idescat, employment	13111	0.301088
6	sex, birth_range, deprivation_index, rurality, education_idescat, occupation_status	13111	0.299028
6	sex, birth_range, deprivation_index, rurality, education_idescat, smoking_sidiap	13121	0.286104
6	sex, birth_range, deprivation_index, rurality, education_idescat, smoking_esca	13121	0.285096
6	sex, birth_range, deprivation_index, rurality, education_idescat, household_size	13152	0.301517
6	sex, birth_range, deprivation_index, rurality, education_idescat, health_status	13155	0.303996
6	sex, birth_range, deprivation_index, rurality, education_idescat, bmi	13131	0.316372
6	sex, birth_range, deprivation_index, rurality, education_idescat, pc_visits	13171	0.299937
6	sex, birth_range, deprivation_index, rurality, education_idescat, elixhauser_cat	13171	0.3043
6	sex, birth_range, deprivation_index, rurality, education_esca, civil_status	13151	0.29606
6	sex, birth_range, deprivation_index, rurality, education_esca, employment	13111	0.29728
6	sex, birth_range, deprivation_index, rurality, education_esca, occupation_status	13111	0.291877
6	sex, birth_range, deprivation_index, rurality, education_esca, smoking_sidiap	13121	0.284261
6	sex, birth_range, deprivation_index, rurality, education_esca, smoking_esca	13121	0.282816
6	sex, birth_range, deprivation_index, rurality, education_esca, household_size	13152	0.298155
6	sex, birth_range, deprivation_index, rurality, education_esca, health_status	13155	0.299312
6	sex, birth_range, deprivation_index, rurality, education_esca, bmi	13131	0.311765
6	sex, birth_range, deprivation_index, rurality, education_esca, pc_visits	13171	0.289574
6	sex, birth_range, deprivation_index, rurality, education_esca, elixhauser_cat	13171	0.298342
6	sex, birth_range, deprivation_index, rurality, civil_status, employment	13122	0.297157
6	sex, birth_range, deprivation_index, rurality, civil_status, occupation_status	13122	0.29229
6	sex, birth_range, deprivation_index, rurality, civil_status, smoking_sidiap	13129	0.285946
6	sex, birth_range, deprivation_index, rurality, civil_status, smoking_esca	13129	0.28569
6	sex, birth_range, deprivation_index, rurality, civil_status, household_size	13163	0.294027
6	sex, birth_range, deprivation_index, rurality, civil_status, health_status	13165	0.29992
6	sex, birth_range, deprivation_index, rurality, civil_status, bmi	13141	0.315254
6	sex, birth_range, deprivation_index, rurality, civil_status, pc_visits	13181	0.293825
6	sex, birth_range, deprivation_index, rurality, civil_status, elixhauser_cat	13181	0.29696
6	sex, birth_range, deprivation_index, rurality, employment, smoking_sidiap	13092	0.286133
6	sex, birth_range, deprivation_index, rurality, employment, smoking_esca	13092	0.285365
6	sex, birth_range, deprivation_index, rurality, employment, household_size	13122	0.295758
6	sex, birth_range, deprivation_index, rurality, employment, health_status	13127	0.299919
6	sex, birth_range, deprivation_index, rurality, employment, bmi	13101	0.314648
6	sex, birth_range, deprivation_index, rurality, employment, pc_visits	13141	0.29032
6	sex, birth_range, deprivation_index, rurality, employment, elixhauser_cat	13141	0.297584
6	sex, birth_range, deprivation_index, rurality, occupation_status, smoking_sidiap	13092	0.282796
6	sex, birth_range, deprivation_index, rurality, occupation_status, smoking_esca	13092	0.282714
6	sex, birth_range, deprivation_index, rurality, occupation_status, household_size	13122	0.290331
6	sex, birth_range, deprivation_index, rurality, occupation_status, health_status	13127	0.287747
6	sex, birth_range, deprivation_index, rurality, occupation_status, bmi	13101	0.30615
6	sex, birth_range, deprivation_index, rurality, occupation_status, pc_visits	13141	0.271344
6	sex, birth_range, deprivation_index, rurality, occupation_status, elixhauser_cat	13141	0.291285
6	sex, birth_range, deprivation_index, rurality, smoking_sidiap, household_size	13130	0.284412
6	sex, birth_range, deprivation_index, rurality, smoking_sidiap, health_status	13135	0.289346
6	sex, birth_range, deprivation_index, rurality, smoking_sidiap, bmi	13110	0.305362
6	sex, birth_range, deprivation_index, rurality, smoking_sidiap, pc_visits	13150	0.280611
6	sex, birth_range, deprivation_index, rurality, smoking_sidiap, elixhauser_cat	13150	0.286945
6	sex, birth_range, deprivation_index, rurality, smoking_esca, household_size	13130	0.284329
6	sex, birth_range, deprivation_index, rurality, smoking_esca, health_status	13135	0.289281
6	sex, birth_range, deprivation_index, rurality, smoking_esca, bmi	13110	0.305566
6	sex, birth_range, deprivation_index, rurality, smoking_esca, pc_visits	13150	0.28085
6	sex, birth_range, deprivation_index, rurality, smoking_esca, elixhauser_cat	13150	0.28675
6	sex, birth_range, deprivation_index, rurality, household_size, health_status	13167	0.299746
6	sex, birth_range, deprivation_index, rurality, household_size, bmi	13142	0.31242
6	sex, birth_range, deprivation_index, rurality, household_size, pc_visits	13182	0.294622
6	sex, birth_range, deprivation_index, rurality, household_size, elixhauser_cat	13182	0.296421
6	sex, birth_range, deprivation_index, rurality, health_status, bmi	13146	0.314772
6	sex, birth_range, deprivation_index, rurality, health_status, pc_visits	13186	0.269521
6	sex, birth_range, deprivation_index, rurality, health_status, elixhauser_cat	13186	0.297537
6	sex, birth_range, deprivation_index, rurality, bmi, pc_visits	13162	0.328778
6	sex, birth_range, deprivation_index, rurality, bmi, elixhauser_cat	13162	0.312929
6	sex, birth_range, deprivation_index, rurality, pc_visits, elixhauser_cat	13202	0.282081
6	sex, birth_range, deprivation_index, education_idescat, civil_status, employment	13093	0.292882
6	sex, birth_range, deprivation_index, education_idescat, civil_status, occupation_status	13093	0.290449
6	sex, birth_range, deprivation_index, education_idescat, civil_status, smoking_sidiap	13101	0.280992
6	sex, birth_range, deprivation_index, education_idescat, civil_status, smoking_esca	13101	0.281714
6	sex, birth_range, deprivation_index, education_idescat, civil_status, household_size	13134	0.294131
6	sex, birth_range, deprivation_index, education_idescat, civil_status, health_status	13135	0.299652
6	sex, birth_range, deprivation_index, education_idescat, civil_status, bmi	13111	0.310393
6	sex, birth_range, deprivation_index, education_idescat, civil_status, pc_visits	13151	0.288612
6	sex, birth_range, deprivation_index, education_idescat, civil_status, elixhauser_cat	13151	0.29697
6	sex, birth_range, deprivation_index, education_idescat, employment, smoking_sidiap	13064	0.281807
6	sex, birth_range, deprivation_index, education_idescat, employment, smoking_esca	13064	0.282333
6	sex, birth_range, deprivation_index, education_idescat, employment, household_size	13093	0.297963
6	sex, birth_range, deprivation_index, education_idescat, employment, health_status	13097	0.299683
6	sex, birth_range, deprivation_index, education_idescat, employment, bmi	13071	0.312207
6	sex, birth_range, deprivation_index, education_idescat, employment, pc_visits	13111	0.28895
6	sex, birth_range, deprivation_index, education_idescat, employment, elixhauser_cat	13111	0.300173
6	sex, birth_range, deprivation_index, education_idescat, occupation_status, smoking_sidiap	13064	0.279012
6	sex, birth_range, deprivation_index, education_idescat, occupation_status, smoking_esca	13064	0.277463
6	sex, birth_range, deprivation_index, education_idescat, occupation_status, household_size	13093	0.294498
6	sex, birth_range, deprivation_index, education_idescat, occupation_status, health_status	13097	0.287765
6	sex, birth_range, deprivation_index, education_idescat, occupation_status, bmi	13071	0.305235
6	sex, birth_range, deprivation_index, education_idescat, occupation_status, pc_visits	13111	0.272017
6	sex, birth_range, deprivation_index, education_idescat, occupation_status, elixhauser_cat	13111	0.296221
6	sex, birth_range, deprivation_index, education_idescat, smoking_sidiap, household_size	13102	0.282112
6	sex, birth_range, deprivation_index, education_idescat, smoking_sidiap, health_status	13106	0.286937
6	sex, birth_range, deprivation_index, education_idescat, smoking_sidiap, bmi	13081	0.307501
6	sex, birth_range, deprivation_index, education_idescat, smoking_sidiap, pc_visits	13121	0.278728
6	sex, birth_range, deprivation_index, education_idescat, smoking_sidiap, elixhauser_cat	13121	0.287354
6	sex, birth_range, deprivation_index, education_idescat, smoking_esca, household_size	13102	0.281813
6	sex, birth_range, deprivation_index, education_idescat, smoking_esca, health_status	13106	0.285587
6	sex, birth_range, deprivation_index, education_idescat, smoking_esca, bmi	13081	0.307698
6	sex, birth_range, deprivation_index, education_idescat, smoking_esca, pc_visits	13121	0.278748
6	sex, birth_range, deprivation_index, education_idescat, smoking_esca, elixhauser_cat	13121	0.286715
6	sex, birth_range, deprivation_index, education_idescat, household_size, health_status	13137	0.301437
6	sex, birth_range, deprivation_index, education_idescat, household_size, bmi	13112	0.314619
6	sex, birth_range, deprivation_index, education_idescat, household_size, pc_visits	13152	0.292116
6	sex, birth_range, deprivation_index, education_idescat, household_size, elixhauser_cat	13152	0.302518
6	sex, birth_range, deprivation_index, education_idescat, health_status, bmi	13115	0.315572
6	sex, birth_range, deprivation_index, education_idescat, health_status, pc_visits	13155	0.26339
6	sex, birth_range, deprivation_index, education_idescat, health_status, elixhauser_cat	13155	0.300253
6	sex, birth_range, deprivation_index, education_idescat, bmi, pc_visits	13131	0.328019
6	sex, birth_range, deprivation_index, education_idescat, bmi, elixhauser_cat	13131	0.313034
6	sex, birth_range, deprivation_index, education_idescat, pc_visits, elixhauser_cat	13171	0.279295
6	sex, birth_range, deprivation_index, education_esca, civil_status, employment	13093	0.288855
6	sex, birth_range, deprivation_index, education_esca, civil_status, occupation_status	13093	0.284023
6	sex, birth_range, deprivation_index, education_esca, civil_status, smoking_sidiap	13101	0.278955
6	sex, birth_range, deprivation_index, education_esca, civil_status, smoking_esca	13101	0.278493
6	sex, birth_range, deprivation_index, education_esca, civil_status, household_size	13134	0.289027
6	sex, birth_range, deprivation_index, education_esca, civil_status, health_status	13135	0.292872
6	sex, birth_range, deprivation_index, education_esca, civil_status, bmi	13111	0.306021
6	sex, birth_range, deprivation_index, education_esca, civil_status, pc_visits	13151	0.279449
6	sex, birth_range, deprivation_index, education_esca, civil_status, elixhauser_cat	13151	0.289787
6	sex, birth_range, deprivation_index, education_esca, employment, smoking_sidiap	13064	0.278214
6	sex, birth_range, deprivation_index, education_esca, employment, smoking_esca	13064	0.277439
6	sex, birth_range, deprivation_index, education_esca, employment, household_size	13093	0.291197
6	sex, birth_range, deprivation_index, education_esca, employment, health_status	13097	0.291467
6	sex, birth_range, deprivation_index, education_esca, employment, bmi	13071	0.30683
6	sex, birth_range, deprivation_index, education_esca, employment, pc_visits	13111	0.277825
6	sex, birth_range, deprivation_index, education_esca, employment, elixhauser_cat	13111	0.291275
6	sex, birth_range, deprivation_index, education_esca, occupation_status, smoking_sidiap	13064	0.274827
6	sex, birth_range, deprivation_index, education_esca, occupation_status, smoking_esca	13064	0.274295
6	sex, birth_range, deprivation_index, education_esca, occupation_status, household_size	13093	0.284814
6	sex, birth_range, deprivation_index, education_esca, occupation_status, health_status	13097	0.280758
6	sex, birth_range, deprivation_index, education_esca, occupation_status, bmi	13071	0.299554
6	sex, birth_range, deprivation_index, education_esca, occupation_status, pc_visits	13111	0.261884
6	sex, birth_range, deprivation_index, education_esca, occupation_status, elixhauser_cat	13111	0.284728
6	sex, birth_range, deprivation_index, education_esca, smoking_sidiap, household_size	13102	0.280236
6	sex, birth_range, deprivation_index, education_esca, smoking_sidiap, health_status	13106	0.281346
6	sex, birth_range, deprivation_index, education_esca, smoking_sidiap, bmi	13081	0.297945
6	sex, birth_range, deprivation_index, education_esca, smoking_sidiap, pc_visits	13121	0.269336
6	sex, birth_range, deprivation_index, education_esca, smoking_sidiap, elixhauser_cat	13121	0.281497
6	sex, birth_range, deprivation_index, education_esca, smoking_esca, household_size	13102	0.279713
6	sex, birth_range, deprivation_index, education_esca, smoking_esca, health_status	13106	0.280907
6	sex, birth_range, deprivation_index, education_esca, smoking_esca, bmi	13081	0.298513
6	sex, birth_range, deprivation_index, education_esca, smoking_esca, pc_visits	13121	0.269256
6	sex, birth_range, deprivation_index, education_esca, smoking_esca, elixhauser_cat	13121	0.281382
6	sex, birth_range, deprivation_index, education_esca, household_size, health_status	13137	0.294684
6	sex, birth_range, deprivation_index, education_esca, household_size, bmi	13112	0.306761
6	sex, birth_range, deprivation_index, education_esca, household_size, pc_visits	13152	0.283446
6	sex, birth_range, deprivation_index, education_esca, household_size, elixhauser_cat	13152	0.293178
6	sex, birth_range, deprivation_index, education_esca, health_status, bmi	13115	0.30664
6	sex, birth_range, deprivation_index, education_esca, health_status, pc_visits	13155	0.259634
6	sex, birth_range, deprivation_index, education_esca, health_status, elixhauser_cat	13155	0.289809
6	sex, birth_range, deprivation_index, education_esca, bmi, pc_visits	13131	0.317707
6	sex, birth_range, deprivation_index, education_esca, bmi, elixhauser_cat	13131	0.309084
6	sex, birth_range, deprivation_index, education_esca, pc_visits, elixhauser_cat	13171	0.274769
6	sex, birth_range, deprivation_index, civil_status, employment, smoking_sidiap	13073	0.281291
6	sex, birth_range, deprivation_index, civil_status, employment, smoking_esca	13073	0.281304
6	sex, birth_range, deprivation_index, civil_status, employment, household_size	13105	0.289407
6	sex, birth_range, deprivation_index, civil_status, employment, health_status	13108	0.294824
6	sex, birth_range, deprivation_index, civil_status, employment, bmi	13082	0.311051
6	sex, birth_range, deprivation_index, civil_status, employment, pc_visits	13122	0.282445
6	sex, birth_range, deprivation_index, civil_status, employment, elixhauser_cat	13122	0.292039
6	sex, birth_range, deprivation_index, civil_status, occupation_status, smoking_sidiap	13073	0.278567
6	sex, birth_range, deprivation_index, civil_status, occupation_status, smoking_esca	13073	0.278725
6	sex, birth_range, deprivation_index, civil_status, occupation_status, household_size	13105	0.284546
6	sex, birth_range, deprivation_index, civil_status, occupation_status, health_status	13108	0.283548
6	sex, birth_range, deprivation_index, civil_status, occupation_status, bmi	13082	0.302689
6	sex, birth_range, deprivation_index, civil_status, occupation_status, pc_visits	13122	0.26597
6	sex, birth_range, deprivation_index, civil_status, occupation_status, elixhauser_cat	13122	0.286343
6	sex, birth_range, deprivation_index, civil_status, smoking_sidiap, household_size	13111	0.279803
6	sex, birth_range, deprivation_index, civil_status, smoking_sidiap, health_status	13114	0.284977
6	sex, birth_range, deprivation_index, civil_status, smoking_sidiap, bmi	13089	0.302447
6	sex, birth_range, deprivation_index, civil_status, smoking_sidiap, pc_visits	13129	0.273591
6	sex, birth_range, deprivation_index, civil_status, smoking_sidiap, elixhauser_cat	13129	0.284074
6	sex, birth_range, deprivation_index, civil_status, smoking_esca, household_size	13111	0.280084
6	sex, birth_range, deprivation_index, civil_status, smoking_esca, health_status	13114	0.285366
6	sex, birth_range, deprivation_index, civil_status, smoking_esca, bmi	13089	0.303095
6	sex, birth_range, deprivation_index, civil_status, smoking_esca, pc_visits	13129	0.274063
6	sex, birth_range, deprivation_index, civil_status, smoking_esca, elixhauser_cat	13129	0.284868
6	sex, birth_range, deprivation_index, civil_status, household_size, health_status	13148	0.293441
6	sex, birth_range, deprivation_index, civil_status, household_size, bmi	13123	0.308343
6	sex, birth_range, deprivation_index, civil_status, household_size, pc_visits	13163	0.289727
6	sex, birth_range, deprivation_index, civil_status, household_size, elixhauser_cat	13163	0.290608
6	sex, birth_range, deprivation_index, civil_status, health_status, bmi	13125	0.311276
6	sex, birth_range, deprivation_index, civil_status, health_status, pc_visits	13165	0.266889
6	sex, birth_range, deprivation_index, civil_status, health_status, elixhauser_cat	13165	0.292234
6	sex, birth_range, deprivation_index, civil_status, bmi, pc_visits	13141	0.323228
6	sex, birth_range, deprivation_index, civil_status, bmi, elixhauser_cat	13141	0.310426
6	sex, birth_range, deprivation_index, civil_status, pc_visits, elixhauser_cat	13181	0.279058
6	sex, birth_range, deprivation_index, employment, smoking_sidiap, household_size	13073	0.280136
6	sex, birth_range, deprivation_index, employment, smoking_sidiap, health_status	13079	0.283477
6	sex, birth_range, deprivation_index, employment, smoking_sidiap, bmi	13052	0.302273
6	sex, birth_range, deprivation_index, employment, smoking_sidiap, pc_visits	13092	0.268814
6	sex, birth_range, deprivation_index, employment, smoking_sidiap, elixhauser_cat	13092	0.282508
6	sex, birth_range, deprivation_index, employment, smoking_esca, household_size	13073	0.28009
6	sex, birth_range, deprivation_index, employment, smoking_esca, health_status	13079	0.283534
6	sex, birth_range, deprivation_index, employment, smoking_esca, bmi	13052	0.302993
6	sex, birth_range, deprivation_index, employment, smoking_esca, pc_visits	13092	0.269343
6	sex, birth_range, deprivation_index, employment, smoking_esca, elixhauser_cat	13092	0.282857
6	sex, birth_range, deprivation_index, employment, household_size, health_status	13109	0.294682
6	sex, birth_range, deprivation_index, employment, household_size, bmi	13082	0.308582
6	sex, birth_range, deprivation_index, employment, household_size, pc_visits	13122	0.283263
6	sex, birth_range, deprivation_index, employment, household_size, elixhauser_cat	13122	0.292252
6	sex, birth_range, deprivation_index, employment, health_status, bmi	13087	0.310048
6	sex, birth_range, deprivation_index, employment, health_status, pc_visits	13127	0.264744
6	sex, birth_range, deprivation_index, employment, health_status, elixhauser_cat	13127	0.292337
6	sex, birth_range, deprivation_index, employment, bmi, pc_visits	13101	0.319216
6	sex, birth_range, deprivation_index, employment, bmi, elixhauser_cat	13101	0.309774
6	sex, birth_range, deprivation_index, employment, pc_visits, elixhauser_cat	13141	0.276453
6	sex, birth_range, deprivation_index, occupation_status, smoking_sidiap, household_size	13073	0.276237
6	sex, birth_range, deprivation_index, occupation_status, smoking_sidiap, health_status	13079	0.27732
6	sex, birth_range, deprivation_index, occupation_status, smoking_sidiap, bmi	13052	0.295571
6	sex, birth_range, deprivation_index, occupation_status, smoking_sidiap, pc_visits	13092	0.251893
6	sex, birth_range, deprivation_index, occupation_status, smoking_sidiap, elixhauser_cat	13092	0.278407
6	sex, birth_range, deprivation_index, occupation_status, smoking_esca, household_size	13073	0.276256
6	sex, birth_range, deprivation_index, occupation_status, smoking_esca, health_status	13079	0.278478
6	sex, birth_range, deprivation_index, occupation_status, smoking_esca, bmi	13052	0.296128
6	sex, birth_range, deprivation_index, occupation_status, smoking_esca, pc_visits	13092	0.253203
6	sex, birth_range, deprivation_index, occupation_status, smoking_esca, elixhauser_cat	13092	0.279178
6	sex, birth_range, deprivation_index, occupation_status, household_size, health_status	13109	0.282954
6	sex, birth_range, deprivation_index, occupation_status, household_size, bmi	13082	0.2991
6	sex, birth_range, deprivation_index, occupation_status, household_size, pc_visits	13122	0.26445
6	sex, birth_range, deprivation_index, occupation_status, household_size, elixhauser_cat	13122	0.285282
6	sex, birth_range, deprivation_index, occupation_status, health_status, bmi	13087	0.300089
6	sex, birth_range, deprivation_index, occupation_status, health_status, pc_visits	13127	0.25061
6	sex, birth_range, deprivation_index, occupation_status, health_status, elixhauser_cat	13127	0.280114
6	sex, birth_range, deprivation_index, occupation_status, bmi, pc_visits	13101	0.29704
6	sex, birth_range, deprivation_index, occupation_status, bmi, elixhauser_cat	13101	0.304774
6	sex, birth_range, deprivation_index, occupation_status, pc_visits, elixhauser_cat	13141	0.265133
6	sex, birth_range, deprivation_index, smoking_sidiap, household_size, health_status	13116	0.284576
6	sex, birth_range, deprivation_index, smoking_sidiap, household_size, bmi	13090	0.302783
6	sex, birth_range, deprivation_index, smoking_sidiap, household_size, pc_visits	13130	0.276375
6	sex, birth_range, deprivation_index, smoking_sidiap, household_size, elixhauser_cat	13130	0.283306
6	sex, birth_range, deprivation_index, smoking_sidiap, health_status, bmi	13095	0.300806
6	sex, birth_range, deprivation_index, smoking_sidiap, health_status, pc_visits	13135	0.25603
6	sex, birth_range, deprivation_index, smoking_sidiap, health_status, elixhauser_cat	13135	0.282566
6	sex, birth_range, deprivation_index, smoking_sidiap, bmi, pc_visits	13110	0.312559
6	sex, birth_range, deprivation_index, smoking_sidiap, bmi, elixhauser_cat	13110	0.299006
6	sex, birth_range, deprivation_index, smoking_sidiap, pc_visits, elixhauser_cat	13150	0.266062
6	sex, birth_range, deprivation_index, smoking_esca, household_size, health_status	13116	0.285058
6	sex, birth_range, deprivation_index, smoking_esca, household_size, bmi	13090	0.303807
6	sex, birth_range, deprivation_index, smoking_esca, household_size, pc_visits	13130	0.277121
6	sex, birth_range, deprivation_index, smoking_esca, household_size, elixhauser_cat	13130	0.283864
6	sex, birth_range, deprivation_index, smoking_esca, health_status, bmi	13095	0.30192
6	sex, birth_range, deprivation_index, smoking_esca, health_status, pc_visits	13135	0.255656
6	sex, birth_range, deprivation_index, smoking_esca, health_status, elixhauser_cat	13135	0.283111
6	sex, birth_range, deprivation_index, smoking_esca, bmi, pc_visits	13110	0.312541
6	sex, birth_range, deprivation_index, smoking_esca, bmi, elixhauser_cat	13110	0.298233
6	sex, birth_range, deprivation_index, smoking_esca, pc_visits, elixhauser_cat	13150	0.266247
6	sex, birth_range, deprivation_index, household_size, health_status, bmi	13127	0.309144
6	sex, birth_range, deprivation_index, household_size, health_status, pc_visits	13167	0.26721
6	sex, birth_range, deprivation_index, household_size, health_status, elixhauser_cat	13167	0.29295
6	sex, birth_range, deprivation_index, household_size, bmi, pc_visits	13142	0.325996
6	sex, birth_range, deprivation_index, household_size, bmi, elixhauser_cat	13142	0.309244
6	sex, birth_range, deprivation_index, household_size, pc_visits, elixhauser_cat	13182	0.278447
6	sex, birth_range, deprivation_index, health_status, bmi, pc_visits	13146	0.29535
6	sex, birth_range, deprivation_index, health_status, bmi, elixhauser_cat	13146	0.311193
6	sex, birth_range, deprivation_index, health_status, pc_visits, elixhauser_cat	13186	0.266509
6	sex, birth_range, deprivation_index, bmi, pc_visits, elixhauser_cat	13162	0.291076
6	sex, birth_range, rurality, education_idescat, civil_status, employment	13093	0.282255
6	sex, birth_range, rurality, education_idescat, civil_status, occupation_status	13093	0.283891
6	sex, birth_range, rurality, education_idescat, civil_status, smoking_sidiap	13101	0.26308
6	sex, birth_range, rurality, education_idescat, civil_status, smoking_esca	13101	0.261812
6	sex, birth_range, rurality, education_idescat, civil_status, household_size	13134	0.281045
6	sex, birth_range, rurality, education_idescat, civil_status, health_status	13135	0.274946
6	sex, birth_range, rurality, education_idescat, civil_status, bmi	13111	0.306648
6	sex, birth_range, rurality, education_idescat, civil_status, pc_visits	13151	0.282923
6	sex, birth_range, rurality, education_idescat, civil_status, elixhauser_cat	13151	0.287522
6	sex, birth_range, rurality, education_idescat, employment, smoking_sidiap	13064	0.266743
6	sex, birth_range, rurality, education_idescat, employment, smoking_esca	13064	0.265271
6	sex, birth_range, rurality, education_idescat, employment, household_size	13093	0.286253
6	sex, birth_range, rurality, education_idescat, employment, health_status	13097	0.276362
6	sex, birth_range, rurality, education_idescat, employment, bmi	13071	0.309898
6	sex, birth_range, rurality, education_idescat, employment, pc_visits	13111	0.286932
6	sex, birth_range, rurality, education_idescat, employment, elixhauser_cat	13111	0.294437
6	sex, birth_range, rurality, education_idescat, occupation_status, smoking_sidiap	13064	0.275081
6	sex, birth_range, rurality, education_idescat, occupation_status, smoking_esca	13064	0.273195
6	sex, birth_range, rurality, education_idescat, occupation_status, household_size	13093	0.287266
6	sex, birth_range, rurality, education_idescat, occupation_status, health_status	13097	0.273674
6	sex, birth_range, rurality, education_idescat, occupation_status, bmi	13071	0.307455
6	sex, birth_range, rurality, education_idescat, occupation_status, pc_visits	13111	0.274239
6	sex, birth_range, rurality, education_idescat, occupation_status, elixhauser_cat	13111	0.295138
6	sex, birth_range, rurality, education_idescat, smoking_sidiap, household_size	13102	0.266613
6	sex, birth_range, rurality, education_idescat, smoking_sidiap, health_status	13106	0.259705
6	sex, birth_range, rurality, education_idescat, smoking_sidiap, bmi	13081	0.297105
6	sex, birth_range, rurality, education_idescat, smoking_sidiap, pc_visits	13121	0.273255
6	sex, birth_range, rurality, education_idescat, smoking_sidiap, elixhauser_cat	13121	0.274787
6	sex, birth_range, rurality, education_idescat, smoking_esca, household_size	13102	0.264827
6	sex, birth_range, rurality, education_idescat, smoking_esca, health_status	13106	0.257693
6	sex, birth_range, rurality, education_idescat, smoking_esca, bmi	13081	0.295658
6	sex, birth_range, rurality, education_idescat, smoking_esca, pc_visits	13121	0.272814
6	sex, birth_range, rurality, education_idescat, smoking_esca, elixhauser_cat	13121	0.273023
6	sex, birth_range, rurality, education_idescat, household_size, health_status	13137	0.277269
6	sex, birth_range, rurality, education_idescat, household_size, bmi	13112	0.312164
6	sex, birth_range, rurality, education_idescat, household_size, pc_visits	13152	0.289496
6	sex, birth_range, rurality, education_idescat, household_size, elixhauser_cat	13152	0.293598
6	sex, birth_range, rurality, education_idescat, health_status, bmi	13115	0.298757
6	sex, birth_range, rurality, education_idescat, health_status, pc_visits	13155	0.252046
6	sex, birth_range, rurality, education_idescat, health_status, elixhauser_cat	13155	0.276839
6	sex, birth_range, rurality, education_idescat, bmi, pc_visits	13131	0.322969
6	sex, birth_range, rurality, education_idescat, bmi, elixhauser_cat	13131	0.306989
6	sex, birth_range, rurality, education_idescat, pc_visits, elixhauser_cat	13171	0.270615
6	sex, birth_range, rurality, education_esca, civil_status, employment	13093	0.27269
6	sex, birth_range, rurality, education_esca, civil_status, occupation_status	13093	0.265346
6	sex, birth_range, rurality, education_esca, civil_status, smoking_sidiap	13101	0.261006
6	sex, birth_range, rurality, education_esca, civil_status, smoking_esca	13101	0.260119
6	sex, birth_range, rurality, education_esca, civil_status, household_size	13134	0.271804
6	sex, birth_range, rurality, education_esca, civil_status, health_status	13135	0.269833
6	sex, birth_range, rurality, education_esca, civil_status, bmi	13111	0.293758
6	sex, birth_range, rurality, education_esca, civil_status, pc_visits	13151	0.273569
6	sex, birth_range, rurality, education_esca, civil_status, elixhauser_cat	13151	0.27446
6	sex, birth_range, rurality, education_esca, employment, smoking_sidiap	13064	0.262779
6	sex, birth_range, rurality, education_esca, employment, smoking_esca	13064	0.261374
6	sex, birth_range, rurality, education_esca, employment, household_size	13093	0.275293
6	sex, birth_range, rurality, education_esca, employment, health_status	13097	0.271355
6	sex, birth_range, rurality, education_esca, employment, bmi	13071	0.296729
6	sex, birth_range, rurality, education_esca, employment, pc_visits	13111	0.274456
6	sex, birth_range, rurality, education_esca, employment, elixhauser_cat	13111	0.278475
6	sex, birth_range, rurality, education_esca, occupation_status, smoking_sidiap	13064	0.260517
6	sex, birth_range, rurality, education_esca, occupation_status, smoking_esca	13064	0.260529
6	sex, birth_range, rurality, education_esca, occupation_status, household_size	13093	0.267103
6	sex, birth_range, rurality, education_esca, occupation_status, health_status	13097	0.266824
6	sex, birth_range, rurality, education_esca, occupation_status, bmi	13071	0.287113
6	sex, birth_range, rurality, education_esca, occupation_status, pc_visits	13111	0.252058
6	sex, birth_range, rurality, education_esca, occupation_status, elixhauser_cat	13111	0.271468
6	sex, birth_range, rurality, education_esca, smoking_sidiap, household_size	13102	0.261694
6	sex, birth_range, rurality, education_esca, smoking_sidiap, health_status	13106	0.258214
6	sex, birth_range, rurality, education_esca, smoking_sidiap, bmi	13081	0.284167
6	sex, birth_range, rurality, education_esca, smoking_sidiap, pc_visits	13121	0.263956
6	sex, birth_range, rurality, education_esca, smoking_sidiap, elixhauser_cat	13121	0.266378
6	sex, birth_range, rurality, education_esca, smoking_esca, household_size	13102	0.260186
6	sex, birth_range, rurality, education_esca, smoking_esca, health_status	13106	0.257533
6	sex, birth_range, rurality, education_esca, smoking_esca, bmi	13081	0.283055
6	sex, birth_range, rurality, education_esca, smoking_esca, pc_visits	13121	0.264836
6	sex, birth_range, rurality, education_esca, smoking_esca, elixhauser_cat	13121	0.265775
6	sex, birth_range, rurality, education_esca, household_size, health_status	13137	0.273193
6	sex, birth_range, rurality, education_esca, household_size, bmi	13112	0.297497
6	sex, birth_range, rurality, education_esca, household_size, pc_visits	13152	0.27756
6	sex, birth_range, rurality, education_esca, household_size, elixhauser_cat	13152	0.278662
6	sex, birth_range, rurality, education_esca, health_status, bmi	13115	0.290836
6	sex, birth_range, rurality, education_esca, health_status, pc_visits	13155	0.249764
6	sex, birth_range, rurality, education_esca, health_status, elixhauser_cat	13155	0.272832
6	sex, birth_range, rurality, education_esca, bmi, pc_visits	13131	0.311868
6	sex, birth_range, rurality, education_esca, bmi, elixhauser_cat	13131	0.294131
6	sex, birth_range, rurality, education_esca, pc_visits, elixhauser_cat	13171	0.261237
6	sex, birth_range, rurality, civil_status, employment, smoking_sidiap	13073	0.263721
6	sex, birth_range, rurality, civil_status, employment, smoking_esca	13073	0.263799
6	sex, birth_range, rurality, civil_status, employment, household_size	13105	0.274534
6	sex, birth_range, rurality, civil_status, employment, health_status	13108	0.265271
6	sex, birth_range, rurality, civil_status, employment, bmi	13082	0.303758
6	sex, birth_range, rurality, civil_status, employment, pc_visits	13122	0.283149
6	sex, birth_range, rurality, civil_status, employment, elixhauser_cat	13122	0.276991
6	sex, birth_range, rurality, civil_status, occupation_status, smoking_sidiap	13073	0.264576
6	sex, birth_range, rurality, civil_status, occupation_status, smoking_esca	13073	0.265405
6	sex, birth_range, rurality, civil_status, occupation_status, household_size	13105	0.266643
6	sex, birth_range, rurality, civil_status, occupation_status, health_status	13108	0.26409
6	sex, birth_range, rurality, civil_status, occupation_status, bmi	13082	0.289639
6	sex, birth_range, rurality, civil_status, occupation_status, pc_visits	13122	0.262094
6	sex, birth_range, rurality, civil_status, occupation_status, elixhauser_cat	13122	0.273365
6	sex, birth_range, rurality, civil_status, smoking_sidiap, household_size	13111	0.262259
6	sex, birth_range, rurality, civil_status, smoking_sidiap, health_status	13114	0.256251
6	sex, birth_range, rurality, civil_status, smoking_sidiap, bmi	13089	0.297558
6	sex, birth_range, rurality, civil_status, smoking_sidiap, pc_visits	13129	0.27467
6	sex, birth_range, rurality, civil_status, smoking_sidiap, elixhauser_cat	13129	0.267055
6	sex, birth_range, rurality, civil_status, smoking_esca, household_size	13111	0.261627
6	sex, birth_range, rurality, civil_status, smoking_esca, health_status	13114	0.257035
6	sex, birth_range, rurality, civil_status, smoking_esca, bmi	13089	0.297692
6	sex, birth_range, rurality, civil_status, smoking_esca, pc_visits	13129	0.276026
6	sex, birth_range, rurality, civil_status, smoking_esca, elixhauser_cat	13129	0.267916
6	sex, birth_range, rurality, civil_status, household_size, health_status	13148	0.263527
6	sex, birth_range, rurality, civil_status, household_size, bmi	13123	0.310085
6	sex, birth_range, rurality, civil_status, household_size, pc_visits	13163	0.28869
6	sex, birth_range, rurality, civil_status, household_size, elixhauser_cat	13163	0.275017
6	sex, birth_range, rurality, civil_status, health_status, bmi	13125	0.293577
6	sex, birth_range, rurality, civil_status, health_status, pc_visits	13165	0.253658
6	sex, birth_range, rurality, civil_status, health_status, elixhauser_cat	13165	0.266416
6	sex, birth_range, rurality, civil_status, bmi, pc_visits	13141	0.317452
6	sex, birth_range, rurality, civil_status, bmi, elixhauser_cat	13141	0.291507
6	sex, birth_range, rurality, civil_status, pc_visits, elixhauser_cat	13181	0.270139
6	sex, birth_range, rurality, employment, smoking_sidiap, household_size	13073	0.26214
6	sex, birth_range, rurality, employment, smoking_sidiap, health_status	13079	0.257139
6	sex, birth_range, rurality, employment, smoking_sidiap, bmi	13052	0.294288
6	sex, birth_range, rurality, employment, smoking_sidiap, pc_visits	13092	0.269445
6	sex, birth_range, rurality, employment, smoking_sidiap, elixhauser_cat	13092	0.268126
6	sex, birth_range, rurality, employment, smoking_esca, household_size	13073	0.261855
6	sex, birth_range, rurality, employment, smoking_esca, health_status	13079	0.257949
6	sex, birth_range, rurality, employment, smoking_esca, bmi	13052	0.294974
6	sex, birth_range, rurality, employment, smoking_esca, pc_visits	13092	0.270695
6	sex, birth_range, rurality, employment, smoking_esca, elixhauser_cat	13092	0.268504
6	sex, birth_range, rurality, employment, household_size, health_status	13109	0.264402
6	sex, birth_range, rurality, employment, household_size, bmi	13082	0.303664
6	sex, birth_range, rurality, employment, household_size, pc_visits	13122	0.283453
6	sex, birth_range, rurality, employment, household_size, elixhauser_cat	13122	0.276771
6	sex, birth_range, rurality, employment, health_status, bmi	13087	0.293963
6	sex, birth_range, rurality, employment, health_status, pc_visits	13127	0.252697
6	sex, birth_range, rurality, employment, health_status, elixhauser_cat	13127	0.268049
6	sex, birth_range, rurality, employment, bmi, pc_visits	13101	0.313927
6	sex, birth_range, rurality, employment, bmi, elixhauser_cat	13101	0.293527
6	sex, birth_range, rurality, employment, pc_visits, elixhauser_cat	13141	0.267478
6	sex, birth_range, rurality, occupation_status, smoking_sidiap, household_size	13073	0.260881
6	sex, birth_range, rurality, occupation_status, smoking_sidiap, health_status	13079	0.255867
6	sex, birth_range, rurality, occupation_status, smoking_sidiap, bmi	13052	0.286186
6	sex, birth_range, rurality, occupation_status, smoking_sidiap, pc_visits	13092	0.252669
6	sex, birth_range, rurality, occupation_status, smoking_sidiap, elixhauser_cat	13092	0.268902
6	sex, birth_range, rurality, occupation_status, smoking_esca, household_size	13073	0.261453
6	sex, birth_range, rurality, occupation_status, smoking_esca, health_status	13079	0.255557
6	sex, birth_range, rurality, occupation_status, smoking_esca, bmi	13052	0.286784
6	sex, birth_range, rurality, occupation_status, smoking_esca, pc_visits	13092	0.253095
6	sex, birth_range, rurality, occupation_status, smoking_esca, elixhauser_cat	13092	0.269921
6	sex, birth_range, rurality, occupation_status, household_size, health_status	13109	0.264002
6	sex, birth_range, rurality, occupation_status, household_size, bmi	13082	0.28699
6	sex, birth_range, rurality, occupation_status, household_size, pc_visits	13122	0.259954
6	sex, birth_range, rurality, occupation_status, household_size, elixhauser_cat	13122	0.27196
6	sex, birth_range, rurality, occupation_status, health_status, bmi	13087	0.282505
6	sex, birth_range, rurality, occupation_status, health_status, pc_visits	13127	0.245343
6	sex, birth_range, rurality, occupation_status, health_status, elixhauser_cat	13127	0.268433
6	sex, birth_range, rurality, occupation_status, bmi, pc_visits	13101	0.292154
6	sex, birth_range, rurality, occupation_status, bmi, elixhauser_cat	13101	0.289351
6	sex, birth_range, rurality, occupation_status, pc_visits, elixhauser_cat	13141	0.253631
6	sex, birth_range, rurality, smoking_sidiap, household_size, health_status	13116	0.254138
6	sex, birth_range, rurality, smoking_sidiap, household_size, bmi	13090	0.299099
6	sex, birth_range, rurality, smoking_sidiap, household_size, pc_visits	13130	0.277125
6	sex, birth_range, rurality, smoking_sidiap, household_size, elixhauser_cat	13130	0.265219
6	sex, birth_range, rurality, smoking_sidiap, health_status, bmi	13095	0.286349
6	sex, birth_range, rurality, smoking_sidiap, health_status, pc_visits	13135	0.246578
6	sex, birth_range, rurality, smoking_sidiap, health_status, elixhauser_cat	13135	0.257912
6	sex, birth_range, rurality, smoking_sidiap, bmi, pc_visits	13110	0.307199
6	sex, birth_range, rurality, smoking_sidiap, bmi, elixhauser_cat	13110	0.280513
6	sex, birth_range, rurality, smoking_sidiap, pc_visits, elixhauser_cat	13150	0.253353
6	sex, birth_range, rurality, smoking_esca, household_size, health_status	13116	0.254871
6	sex, birth_range, rurality, smoking_esca, household_size, bmi	13090	0.299074
6	sex, birth_range, rurality, smoking_esca, household_size, pc_visits	13130	0.27814
6	sex, birth_range, rurality, smoking_esca, household_size, elixhauser_cat	13130	0.265404
6	sex, birth_range, rurality, smoking_esca, health_status, bmi	13095	0.285904
6	sex, birth_range, rurality, smoking_esca, health_status, pc_visits	13135	0.248158
6	sex, birth_range, rurality, smoking_esca, health_status, elixhauser_cat	13135	0.259554
6	sex, birth_range, rurality, smoking_esca, bmi, pc_visits	13110	0.306826
6	sex, birth_range, rurality, smoking_esca, bmi, elixhauser_cat	13110	0.279516
6	sex, birth_range, rurality, smoking_esca, pc_visits, elixhauser_cat	13150	0.253255
6	sex, birth_range, rurality, household_size, health_status, bmi	13127	0.290835
6	sex, birth_range, rurality, household_size, health_status, pc_visits	13167	0.249721
6	sex, birth_range, rurality, household_size, health_status, elixhauser_cat	13167	0.266424
6	sex, birth_range, rurality, household_size, bmi, pc_visits	13142	0.319561
6	sex, birth_range, rurality, household_size, bmi, elixhauser_cat	13142	0.291064
6	sex, birth_range, rurality, household_size, pc_visits, elixhauser_cat	13182	0.268667
6	sex, birth_range, rurality, health_status, bmi, pc_visits	13146	0.28775
6	sex, birth_range, rurality, health_status, bmi, elixhauser_cat	13146	0.286689
6	sex, birth_range, rurality, health_status, pc_visits, elixhauser_cat	13186	0.246068
6	sex, birth_range, rurality, bmi, pc_visits, elixhauser_cat	13162	0.279274
6	sex, birth_range, education_idescat, civil_status, employment, smoking_sidiap	13277	0.262857
6	sex, birth_range, education_idescat, civil_status, employment, smoking_esca	13277	0.261549
6	sex, birth_range, education_idescat, civil_status, employment, household_size	13308	0.276945
6	sex, birth_range, education_idescat, civil_status, employment, health_status	13311	0.269776
6	sex, birth_range, education_idescat, civil_status, employment, bmi	13284	0.298973
6	sex, birth_range, education_idescat, civil_status, employment, pc_visits	13325	0.276244
6	sex, birth_range, education_idescat, civil_status, employment, elixhauser_cat	13325	0.283647
6	sex, birth_range, education_idescat, civil_status, occupation_status, smoking_sidiap	13277	0.270501
6	sex, birth_range, education_idescat, civil_status, occupation_status, smoking_esca	13277	0.270114
6	sex, birth_range, education_idescat, civil_status, occupation_status, household_size	13308	0.276864
6	sex, birth_range, education_idescat, civil_status, occupation_status, health_status	13311	0.264575
6	sex, birth_range, education_idescat, civil_status, occupation_status, bmi	13284	0.298324
6	sex, birth_range, education_idescat, civil_status, occupation_status, pc_visits	13325	0.265185
6	sex, birth_range, education_idescat, civil_status, occupation_status, elixhauser_cat	13325	0.283862
6	sex, birth_range, education_idescat, civil_status, smoking_sidiap, household_size	13314	0.264554
6	sex, birth_range, education_idescat, civil_status, smoking_sidiap, health_status	13317	0.258445
6	sex, birth_range, education_idescat, civil_status, smoking_sidiap, bmi	13291	0.291362
6	sex, birth_range, education_idescat, civil_status, smoking_sidiap, pc_visits	13332	0.267763
6	sex, birth_range, education_idescat, civil_status, smoking_sidiap, elixhauser_cat	13332	0.270987
6	sex, birth_range, education_idescat, civil_status, smoking_esca, household_size	13314	0.263745
6	sex, birth_range, education_idescat, civil_status, smoking_esca, health_status	13317	0.25776
6	sex, birth_range, education_idescat, civil_status, smoking_esca, bmi	13291	0.292044
6	sex, birth_range, education_idescat, civil_status, smoking_esca, pc_visits	13332	0.268588
6	sex, birth_range, education_idescat, civil_status, smoking_esca, elixhauser_cat	13332	0.270713
6	sex, birth_range, education_idescat, civil_status, household_size, health_status	13350	0.271246
6	sex, birth_range, education_idescat, civil_status, household_size, bmi	13324	0.301839
6	sex, birth_range, education_idescat, civil_status, household_size, pc_visits	13365	0.28006
6	sex, birth_range, education_idescat, civil_status, household_size, elixhauser_cat	13365	0.283401
6	sex, birth_range, education_idescat, civil_status, health_status, bmi	13326	0.291854
6	sex, birth_range, education_idescat, civil_status, health_status, pc_visits	13367	0.245547
6	sex, birth_range, education_idescat, civil_status, health_status, elixhauser_cat	13367	0.270619
6	sex, birth_range, education_idescat, civil_status, bmi, pc_visits	13342	0.313802
6	sex, birth_range, education_idescat, civil_status, bmi, elixhauser_cat	13342	0.29692
6	sex, birth_range, education_idescat, civil_status, pc_visits, elixhauser_cat	13383	0.262991
6	sex, birth_range, education_idescat, employment, smoking_sidiap, household_size	13276	0.265898
6	sex, birth_range, education_idescat, employment, smoking_sidiap, health_status	13282	0.257508
6	sex, birth_range, education_idescat, employment, smoking_sidiap, bmi	13254	0.293588
6	sex, birth_range, education_idescat, employment, smoking_sidiap, pc_visits	13295	0.270088
6	sex, birth_range, education_idescat, employment, smoking_sidiap, elixhauser_cat	13295	0.274639
6	sex, birth_range, education_idescat, employment, smoking_esca, household_size	13276	0.264519
6	sex, birth_range, education_idescat, employment, smoking_esca, health_status	13282	0.256123
6	sex, birth_range, education_idescat, employment, smoking_esca, bmi	13254	0.293895
6	sex, birth_range, education_idescat, employment, smoking_esca, pc_visits	13295	0.270776
6	sex, birth_range, education_idescat, employment, smoking_esca, elixhauser_cat	13295	0.27349
6	sex, birth_range, education_idescat, employment, household_size, health_status	13311	0.271601
6	sex, birth_range, education_idescat, employment, household_size, bmi	13283	0.30458
6	sex, birth_range, education_idescat, employment, household_size, pc_visits	13324	0.28241
6	sex, birth_range, education_idescat, employment, household_size, elixhauser_cat	13324	0.28949
6	sex, birth_range, education_idescat, employment, health_status, bmi	13288	0.293215
6	sex, birth_range, education_idescat, employment, health_status, pc_visits	13329	0.245461
6	sex, birth_range, education_idescat, employment, health_status, elixhauser_cat	13329	0.272682
6	sex, birth_range, education_idescat, employment, bmi, pc_visits	13302	0.314904
6	sex, birth_range, education_idescat, employment, bmi, elixhauser_cat	13302	0.304936
6	sex, birth_range, education_idescat, employment, pc_visits, elixhauser_cat	13343	0.268116
6	sex, birth_range, education_idescat, occupation_status, smoking_sidiap, household_size	13276	0.271965
6	sex, birth_range, education_idescat, occupation_status, smoking_sidiap, health_status	13282	0.258399
6	sex, birth_range, education_idescat, occupation_status, smoking_sidiap, bmi	13254	0.294158
6	sex, birth_range, education_idescat, occupation_status, smoking_sidiap, pc_visits	13295	0.260501
6	sex, birth_range, education_idescat, occupation_status, smoking_sidiap, elixhauser_cat	13295	0.280126
6	sex, birth_range, education_idescat, occupation_status, smoking_esca, household_size	13276	0.271473
6	sex, birth_range, education_idescat, occupation_status, smoking_esca, health_status	13282	0.25865
6	sex, birth_range, education_idescat, occupation_status, smoking_esca, bmi	13254	0.292562
6	sex, birth_range, education_idescat, occupation_status, smoking_esca, pc_visits	13295	0.26014
6	sex, birth_range, education_idescat, occupation_status, smoking_esca, elixhauser_cat	13295	0.279176
6	sex, birth_range, education_idescat, occupation_status, household_size, health_status	13311	0.271246
6	sex, birth_range, education_idescat, occupation_status, household_size, bmi	13283	0.302182
6	sex, birth_range, education_idescat, occupation_status, household_size, pc_visits	13324	0.269493
6	sex, birth_range, education_idescat, occupation_status, household_size, elixhauser_cat	13324	0.288977
6	sex, birth_range, education_idescat, occupation_status, health_status, bmi	13288	0.290719
6	sex, birth_range, education_idescat, occupation_status, health_status, pc_visits	13329	0.240635
6	sex, birth_range, education_idescat, occupation_status, health_status, elixhauser_cat	13329	0.273971
6	sex, birth_range, education_idescat, occupation_status, bmi, pc_visits	13302	0.306651
6	sex, birth_range, education_idescat, occupation_status, bmi, elixhauser_cat	13302	0.309417
6	sex, birth_range, education_idescat, occupation_status, pc_visits, elixhauser_cat	13343	0.264421
6	sex, birth_range, education_idescat, smoking_sidiap, household_size, health_status	13318	0.258043
6	sex, birth_range, education_idescat, smoking_sidiap, household_size, bmi	13291	0.29422
6	sex, birth_range, education_idescat, smoking_sidiap, household_size, pc_visits	13332	0.272023
6	sex, birth_range, education_idescat, smoking_sidiap, household_size, elixhauser_cat	13332	0.274151
6	sex, birth_range, education_idescat, smoking_sidiap, health_status, bmi	13296	0.285076
6	sex, birth_range, education_idescat, smoking_sidiap, health_status, pc_visits	13337	0.233366
6	sex, birth_range, education_idescat, smoking_sidiap, health_status, elixhauser_cat	13337	0.263242
6	sex, birth_range, education_idescat, smoking_sidiap, bmi, pc_visits	13311	0.307421
6	sex, birth_range, education_idescat, smoking_sidiap, bmi, elixhauser_cat	13311	0.292204
6	sex, birth_range, education_idescat, smoking_sidiap, pc_visits, elixhauser_cat	13352	0.25176
6	sex, birth_range, education_idescat, smoking_esca, household_size, health_status	13318	0.256844
6	sex, birth_range, education_idescat, smoking_esca, household_size, bmi	13291	0.29458
6	sex, birth_range, education_idescat, smoking_esca, household_size, pc_visits	13332	0.272557
6	sex, birth_range, education_idescat, smoking_esca, household_size, elixhauser_cat	13332	0.273005
6	sex, birth_range, education_idescat, smoking_esca, health_status, bmi	13296	0.283875
6	sex, birth_range, education_idescat, smoking_esca, health_status, pc_visits	13337	0.233602
6	sex, birth_range, education_idescat, smoking_esca, health_status, elixhauser_cat	13337	0.264144
6	sex, birth_range, education_idescat, smoking_esca, bmi, pc_visits	13311	0.30734
6	sex, birth_range, education_idescat, smoking_esca, bmi, elixhauser_cat	13311	0.290872
6	sex, birth_range, education_idescat, smoking_esca, pc_visits, elixhauser_cat	13352	0.251384
6	sex, birth_range, education_idescat, household_size, health_status, bmi	13327	0.293194
6	sex, birth_range, education_idescat, household_size, health_status, pc_visits	13368	0.245795
6	sex, birth_range, education_idescat, household_size, health_status, elixhauser_cat	13368	0.275205
6	sex, birth_range, education_idescat, household_size, bmi, pc_visits	13342	0.317337
6	sex, birth_range, education_idescat, household_size, bmi, elixhauser_cat	13342	0.301488
6	sex, birth_range, education_idescat, household_size, pc_visits, elixhauser_cat	13383	0.267956
6	sex, birth_range, education_idescat, health_status, bmi, pc_visits	13346	0.280099
6	sex, birth_range, education_idescat, health_status, bmi, elixhauser_cat	13346	0.295287
6	sex, birth_range, education_idescat, health_status, pc_visits, elixhauser_cat	13387	0.246555
6	sex, birth_range, education_idescat, bmi, pc_visits, elixhauser_cat	13362	0.278469
6	sex, birth_range, education_esca, civil_status, employment, smoking_sidiap	13277	0.258287
6	sex, birth_range, education_esca, civil_status, employment, smoking_esca	13277	0.258188
6	sex, birth_range, education_esca, civil_status, employment, household_size	13308	0.265456
6	sex, birth_range, education_esca, civil_status, employment, health_status	13311	0.263566
6	sex, birth_range, education_esca, civil_status, employment, bmi	13284	0.287141
6	sex, birth_range, education_esca, civil_status, employment, pc_visits	13325	0.262085
6	sex, birth_range, education_esca, civil_status, employment, elixhauser_cat	13325	0.269277
6	sex, birth_range, education_esca, civil_status, occupation_status, smoking_sidiap	13277	0.256054
6	sex, birth_range, education_esca, civil_status, occupation_status, smoking_esca	13277	0.257079
6	sex, birth_range, education_esca, civil_status, occupation_status, household_size	13308	0.258514
6	sex, birth_range, education_esca, civil_status, occupation_status, health_status	13311	0.259845
6	sex, birth_range, education_esca, civil_status, occupation_status, bmi	13284	0.280288
6	sex, birth_range, education_esca, civil_status, occupation_status, pc_visits	13325	0.244641
6	sex, birth_range, education_esca, civil_status, occupation_status, elixhauser_cat	13325	0.263343
6	sex, birth_range, education_esca, civil_status, smoking_sidiap, household_size	13314	0.257144
6	sex, birth_range, education_esca, civil_status, smoking_sidiap, health_status	13317	0.254466
6	sex, birth_range, education_esca, civil_status, smoking_sidiap, bmi	13291	0.280067
6	sex, birth_range, education_esca, civil_status, smoking_sidiap, pc_visits	13332	0.257012
6	sex, birth_range, education_esca, civil_status, smoking_sidiap, elixhauser_cat	13332	0.263018
6	sex, birth_range, education_esca, civil_status, smoking_esca, household_size	13314	0.257158
6	sex, birth_range, education_esca, civil_status, smoking_esca, health_status	13317	0.254751
6	sex, birth_range, education_esca, civil_status, smoking_esca, bmi	13291	0.28106
6	sex, birth_range, education_esca, civil_status, smoking_esca, pc_visits	13332	0.258756
6	sex, birth_range, education_esca, civil_status, smoking_esca, elixhauser_cat	13332	0.2639
6	sex, birth_range, education_esca, civil_status, household_size, health_status	13350	0.264825
6	sex, birth_range, education_esca, civil_status, household_size, bmi	13324	0.286037
6	sex, birth_range, education_esca, civil_status, household_size, pc_visits	13365	0.26756
6	sex, birth_range, education_esca, civil_status, household_size, elixhauser_cat	13365	0.268778
6	sex, birth_range, education_esca, civil_status, health_status, bmi	13326	0.28478
6	sex, birth_range, education_esca, civil_status, health_status, pc_visits	13367	0.240726
6	sex, birth_range, education_esca, civil_status, health_status, elixhauser_cat	13367	0.264887
6	sex, birth_range, education_esca, civil_status, bmi, pc_visits	13342	0.303739
6	sex, birth_range, education_esca, civil_status, bmi, elixhauser_cat	13342	0.286711
6	sex, birth_range, education_esca, civil_status, pc_visits, elixhauser_cat	13383	0.254043
6	sex, birth_range, education_esca, employment, smoking_sidiap, household_size	13276	0.259087
6	sex, birth_range, education_esca, employment, smoking_sidiap, health_status	13282	0.253859
6	sex, birth_range, education_esca, employment, smoking_sidiap, bmi	13254	0.281202
6	sex, birth_range, education_esca, employment, smoking_sidiap, pc_visits	13295	0.258057
6	sex, birth_range, education_esca, employment, smoking_sidiap, elixhauser_cat	13295	0.264487
6	sex, birth_range, education_esca, employment, smoking_esca, household_size	13276	0.258611
6	sex, birth_range, education_esca, employment, smoking_esca, health_status	13282	0.253421
6	sex, birth_range, education_esca, employment, smoking_esca, bmi	13254	0.281641
6	sex, birth_range, education_esca, employment, smoking_esca, pc_visits	13295	0.259677
6	sex, birth_range, education_esca, employment, smoking_esca, elixhauser_cat	13295	0.264766
6	sex, birth_range, education_esca, employment, household_size, health_status	13311	0.266446
6	sex, birth_range, education_esca, employment, household_size, bmi	13283	0.289576
6	sex, birth_range, education_esca, employment, household_size, pc_visits	13324	0.266506
6	sex, birth_range, education_esca, employment, household_size, elixhauser_cat	13324	0.273195
6	sex, birth_range, education_esca, employment, health_status, bmi	13288	0.285839
6	sex, birth_range, education_esca, employment, health_status, pc_visits	13329	0.240834
6	sex, birth_range, education_esca, employment, health_status, elixhauser_cat	13329	0.266632
6	sex, birth_range, education_esca, employment, bmi, pc_visits	13302	0.303208
6	sex, birth_range, education_esca, employment, bmi, elixhauser_cat	13302	0.290623
6	sex, birth_range, education_esca, employment, pc_visits, elixhauser_cat	13343	0.255977
6	sex, birth_range, education_esca, occupation_status, smoking_sidiap, household_size	13276	0.256664
6	sex, birth_range, education_esca, occupation_status, smoking_sidiap, health_status	13282	0.250372
6	sex, birth_range, education_esca, occupation_status, smoking_sidiap, bmi	13254	0.281718
6	sex, birth_range, education_esca, occupation_status, smoking_sidiap, pc_visits	13295	0.240086
6	sex, birth_range, education_esca, occupation_status, smoking_sidiap, elixhauser_cat	13295	0.261596
6	sex, birth_range, education_esca, occupation_status, smoking_esca, household_size	13276	0.257352
6	sex, birth_range, education_esca, occupation_status, smoking_esca, health_status	13282	0.249573
6	sex, birth_range, education_esca, occupation_status, smoking_esca, bmi	13254	0.281936
6	sex, birth_range, education_esca, occupation_status, smoking_esca, pc_visits	13295	0.240489
6	sex, birth_range, education_esca, occupation_status, smoking_esca, elixhauser_cat	13295	0.262958
6	sex, birth_range, education_esca, occupation_status, household_size, health_status	13311	0.262257
6	sex, birth_range, education_esca, occupation_status, household_size, bmi	13283	0.282175
6	sex, birth_range, education_esca, occupation_status, household_size, pc_visits	13324	0.246311
6	sex, birth_range, education_esca, occupation_status, household_size, elixhauser_cat	13324	0.265842
6	sex, birth_range, education_esca, occupation_status, health_status, bmi	13288	0.278691
6	sex, birth_range, education_esca, occupation_status, health_status, pc_visits	13329	0.233084
6	sex, birth_range, education_esca, occupation_status, health_status, elixhauser_cat	13329	0.263381
6	sex, birth_range, education_esca, occupation_status, bmi, pc_visits	13302	0.281242
6	sex, birth_range, education_esca, occupation_status, bmi, elixhauser_cat	13302	0.287472
6	sex, birth_range, education_esca, occupation_status, pc_visits, elixhauser_cat	13343	0.242983
6	sex, birth_range, education_esca, smoking_sidiap, household_size, health_status	13318	0.255516
6	sex, birth_range, education_esca, smoking_sidiap, household_size, bmi	13291	0.28192
6	sex, birth_range, education_esca, smoking_sidiap, household_size, pc_visits	13332	0.261376
6	sex, birth_range, education_esca, smoking_sidiap, household_size, elixhauser_cat	13332	0.264465
6	sex, birth_range, education_esca, smoking_sidiap, health_status, bmi	13296	0.278205
6	sex, birth_range, education_esca, smoking_sidiap, health_status, pc_visits	13337	0.229303
6	sex, birth_range, education_esca, smoking_sidiap, health_status, elixhauser_cat	13337	0.256328
6	sex, birth_range, education_esca, smoking_sidiap, bmi, pc_visits	13311	0.298279
6	sex, birth_range, education_esca, smoking_sidiap, bmi, elixhauser_cat	13311	0.280765
6	sex, birth_range, education_esca, smoking_sidiap, pc_visits, elixhauser_cat	13352	0.243685
6	sex, birth_range, education_esca, smoking_esca, household_size, health_status	13318	0.25412
6	sex, birth_range, education_esca, smoking_esca, household_size, bmi	13291	0.282765
6	sex, birth_range, education_esca, smoking_esca, household_size, pc_visits	13332	0.26286
6	sex, birth_range, education_esca, smoking_esca, household_size, elixhauser_cat	13332	0.264706
6	sex, birth_range, education_esca, smoking_esca, health_status, bmi	13296	0.277953
6	sex, birth_range, education_esca, smoking_esca, health_status, pc_visits	13337	0.229194
6	sex, birth_range, education_esca, smoking_esca, health_status, elixhauser_cat	13337	0.254834
6	sex, birth_range, education_esca, smoking_esca, bmi, pc_visits	13311	0.298649
6	sex, birth_range, education_esca, smoking_esca, bmi, elixhauser_cat	13311	0.279776
6	sex, birth_range, education_esca, smoking_esca, pc_visits, elixhauser_cat	13352	0.243948
6	sex, birth_range, education_esca, household_size, health_status, bmi	13327	0.286424
6	sex, birth_range, education_esca, household_size, health_status, pc_visits	13368	0.242663
6	sex, birth_range, education_esca, household_size, health_status, elixhauser_cat	13368	0.268972
6	sex, birth_range, education_esca, household_size, bmi, pc_visits	13342	0.307086
6	sex, birth_range, education_esca, household_size, bmi, elixhauser_cat	13342	0.290406
6	sex, birth_range, education_esca, household_size, pc_visits, elixhauser_cat	13383	0.256932
6	sex, birth_range, education_esca, health_status, bmi, pc_visits	13346	0.272413
6	sex, birth_range, education_esca, health_status, bmi, elixhauser_cat	13346	0.28859
6	sex, birth_range, education_esca, health_status, pc_visits, elixhauser_cat	13387	0.238691
6	sex, birth_range, education_esca, bmi, pc_visits, elixhauser_cat	13362	0.266625
6	sex, birth_range, civil_status, employment, smoking_sidiap, household_size	13286	0.258041
6	sex, birth_range, civil_status, employment, smoking_sidiap, health_status	13291	0.253858
6	sex, birth_range, civil_status, employment, smoking_sidiap, bmi	13263	0.292952
6	sex, birth_range, civil_status, employment, smoking_sidiap, pc_visits	13304	0.266229
6	sex, birth_range, civil_status, employment, smoking_sidiap, elixhauser_cat	13304	0.266001
6	sex, birth_range, civil_status, employment, smoking_esca, household_size	13286	0.259124
6	sex, birth_range, civil_status, employment, smoking_esca, health_status	13291	0.25503
6	sex, birth_range, civil_status, employment, smoking_esca, bmi	13263	0.294419
6	sex, birth_range, civil_status, employment, smoking_esca, pc_visits	13304	0.268285
6	sex, birth_range, civil_status, employment, smoking_esca, elixhauser_cat	13304	0.267559
6	sex, birth_range, civil_status, employment, household_size, health_status	13323	0.260093
6	sex, birth_range, civil_status, employment, household_size, bmi	13295	0.300581
6	sex, birth_range, civil_status, employment, household_size, pc_visits	13336	0.27642
6	sex, birth_range, civil_status, employment, household_size, elixhauser_cat	13336	0.270179
6	sex, birth_range, civil_status, employment, health_status, bmi	13299	0.288298
6	sex, birth_range, civil_status, employment, health_status, pc_visits	13340	0.249053
6	sex, birth_range, civil_status, employment, health_status, elixhauser_cat	13340	0.263568
6	sex, birth_range, civil_status, employment, bmi, pc_visits	13313	0.308782
6	sex, birth_range, civil_status, employment, bmi, elixhauser_cat	13313	0.28715
6	sex, birth_range, civil_status, employment, pc_visits, elixhauser_cat	13354	0.261953
6	sex, birth_range, civil_status, occupation_status, smoking_sidiap, household_size	13286	0.258769
6	sex, birth_range, civil_status, occupation_status, smoking_sidiap, health_status	13291	0.252168
6	sex, birth_range, civil_status, occupation_status, smoking_sidiap, bmi	13263	0.284558
6	sex, birth_range, civil_status, occupation_status, smoking_sidiap, pc_visits	13304	0.250922
6	sex, birth_range, civil_status, occupation_status, smoking_sidiap, elixhauser_cat	13304	0.267093
6	sex, birth_range, civil_status, occupation_status, smoking_esca, household_size	13286	0.260162
6	sex, birth_range, civil_status, occupation_status, smoking_esca, health_status	13291	0.252208
6	sex, birth_range, civil_status, occupation_status, smoking_esca, bmi	13263	0.287394
6	sex, birth_range, civil_status, occupation_status, smoking_esca, pc_visits	13304	0.252632
6	sex, birth_range, civil_status, occupation_status, smoking_esca, elixhauser_cat	13304	0.26941
6	sex, birth_range, civil_status, occupation_status, household_size, health_status	13323	0.259275
6	sex, birth_range, civil_status, occupation_status, household_size, bmi	13295	0.282253
6	sex, birth_range, civil_status, occupation_status, household_size, pc_visits	13336	0.255891
6	sex, birth_range, civil_status, occupation_status, household_size, elixhauser_cat	13336	0.266808
6	sex, birth_range, civil_status, occupation_status, health_status, bmi	13299	0.278015
6	sex, birth_range, civil_status, occupation_status, health_status, pc_visits	13340	0.242607
6	sex, birth_range, civil_status, occupation_status, health_status, elixhauser_cat	13340	0.263652
6	sex, birth_range, civil_status, occupation_status, bmi, pc_visits	13313	0.289251
6	sex, birth_range, civil_status, occupation_status, bmi, elixhauser_cat	13313	0.284457
6	sex, birth_range, civil_status, occupation_status, pc_visits, elixhauser_cat	13354	0.252083
6	sex, birth_range, civil_status, smoking_sidiap, household_size, health_status	13327	0.25028
6	sex, birth_range, civil_status, smoking_sidiap, household_size, bmi	13300	0.298923
6	sex, birth_range, civil_status, smoking_sidiap, household_size, pc_visits	13341	0.270919
6	sex, birth_range, civil_status, smoking_sidiap, household_size, elixhauser_cat	13341	0.263139
6	sex, birth_range, civil_status, smoking_sidiap, health_status, bmi	13304	0.282852
6	sex, birth_range, civil_status, smoking_sidiap, health_status, pc_visits	13345	0.242239
6	sex, birth_range, civil_status, smoking_sidiap, health_status, elixhauser_cat	13345	0.254349
6	sex, birth_range, civil_status, smoking_sidiap, bmi, pc_visits	13319	0.303792
6	sex, birth_range, civil_status, smoking_sidiap, bmi, elixhauser_cat	13319	0.279109
6	sex, birth_range, civil_status, smoking_sidiap, pc_visits, elixhauser_cat	13360	0.252065
6	sex, birth_range, civil_status, smoking_esca, household_size, health_status	13327	0.251639
6	sex, birth_range, civil_status, smoking_esca, household_size, bmi	13300	0.300047
6	sex, birth_range, civil_status, smoking_esca, household_size, pc_visits	13341	0.272204
6	sex, birth_range, civil_status, smoking_esca, household_size, elixhauser_cat	13341	0.264728
6	sex, birth_range, civil_status, smoking_esca, health_status, bmi	13304	0.283325
6	sex, birth_range, civil_status, smoking_esca, health_status, pc_visits	13345	0.243495
6	sex, birth_range, civil_status, smoking_esca, health_status, elixhauser_cat	13345	0.256227
6	sex, birth_range, civil_status, smoking_esca, bmi, pc_visits	13319	0.304542
6	sex, birth_range, civil_status, smoking_esca, bmi, elixhauser_cat	13319	0.279852
6	sex, birth_range, civil_status, smoking_esca, pc_visits, elixhauser_cat	13360	0.252893
6	sex, birth_range, civil_status, household_size, health_status, bmi	13338	0.28509
6	sex, birth_range, civil_status, household_size, health_status, pc_visits	13379	0.246471
6	sex, birth_range, civil_status, household_size, health_status, elixhauser_cat	13379	0.262222
6	sex, birth_range, civil_status, household_size, bmi, pc_visits	13353	0.313995
6	sex, birth_range, civil_status, household_size, bmi, elixhauser_cat	13353	0.283292
6	sex, birth_range, civil_status, household_size, pc_visits, elixhauser_cat	13394	0.263607
6	sex, birth_range, civil_status, health_status, bmi, pc_visits	13356	0.282411
6	sex, birth_range, civil_status, health_status, bmi, elixhauser_cat	13356	0.282255
6	sex, birth_range, civil_status, health_status, pc_visits, elixhauser_cat	13397	0.241935
6	sex, birth_range, civil_status, bmi, pc_visits, elixhauser_cat	13372	0.274204
6	sex, birth_range, employment, smoking_sidiap, household_size, health_status	13291	0.251356
6	sex, birth_range, employment, smoking_sidiap, household_size, bmi	13262	0.294377
6	sex, birth_range, employment, smoking_sidiap, household_size, pc_visits	13303	0.268688
6	sex, birth_range, employment, smoking_sidiap, household_size, elixhauser_cat	13303	0.264335
6	sex, birth_range, employment, smoking_sidiap, health_status, bmi	13269	0.283842
6	sex, birth_range, employment, smoking_sidiap, health_status, pc_visits	13310	0.239955
6	sex, birth_range, employment, smoking_sidiap, health_status, elixhauser_cat	13310	0.255088
6	sex, birth_range, employment, smoking_sidiap, bmi, pc_visits	13282	0.302395
6	sex, birth_range, employment, smoking_sidiap, bmi, elixhauser_cat	13282	0.28106
6	sex, birth_range, employment, smoking_sidiap, pc_visits, elixhauser_cat	13323	0.249789
6	sex, birth_range, employment, smoking_esca, household_size, health_status	13291	0.25283
6	sex, birth_range, employment, smoking_esca, household_size, bmi	13262	0.295619
6	sex, birth_range, employment, smoking_esca, household_size, pc_visits	13303	0.270334
6	sex, birth_range, employment, smoking_esca, household_size, elixhauser_cat	13303	0.265392
6	sex, birth_range, employment, smoking_esca, health_status, bmi	13269	0.284109
6	sex, birth_range, employment, smoking_esca, health_status, pc_visits	13310	0.241703
6	sex, birth_range, employment, smoking_esca, health_status, elixhauser_cat	13310	0.257193
6	sex, birth_range, employment, smoking_esca, bmi, pc_visits	13282	0.303087
6	sex, birth_range, employment, smoking_esca, bmi, elixhauser_cat	13282	0.281292
6	sex, birth_range, employment, smoking_esca, pc_visits, elixhauser_cat	13323	0.250636
6	sex, birth_range, employment, household_size, health_status, bmi	13299	0.285313
6	sex, birth_range, employment, household_size, health_status, pc_visits	13340	0.244957
6	sex, birth_range, employment, household_size, health_status, elixhauser_cat	13340	0.263481
6	sex, birth_range, employment, household_size, bmi, pc_visits	13312	0.310116
6	sex, birth_range, employment, household_size, bmi, elixhauser_cat	13312	0.286964
6	sex, birth_range, employment, household_size, pc_visits, elixhauser_cat	13353	0.260031
6	sex, birth_range, employment, health_status, bmi, pc_visits	13318	0.280926
6	sex, birth_range, employment, health_status, bmi, elixhauser_cat	13318	0.283342
6	sex, birth_range, employment, health_status, pc_visits, elixhauser_cat	13359	0.244234
6	sex, birth_range, employment, bmi, pc_visits, elixhauser_cat	13332	0.274318
6	sex, birth_range, occupation_status, smoking_sidiap, household_size, health_status	13291	0.250919
6	sex, birth_range, occupation_status, smoking_sidiap, household_size, bmi	13262	0.281378
6	sex, birth_range, occupation_status, smoking_sidiap, household_size, pc_visits	13303	0.248135
6	sex, birth_range, occupation_status, smoking_sidiap, household_size, elixhauser_cat	13303	0.264281
6	sex, birth_range, occupation_status, smoking_sidiap, health_status, bmi	13269	0.272654
6	sex, birth_range, occupation_status, smoking_sidiap, health_status, pc_visits	13310	0.23337
6	sex, birth_range, occupation_status, smoking_sidiap, health_status, elixhauser_cat	13310	0.2578
6	sex, birth_range, occupation_status, smoking_sidiap, bmi, pc_visits	13282	0.284434
6	sex, birth_range, occupation_status, smoking_sidiap, bmi, elixhauser_cat	13282	0.28493
6	sex, birth_range, occupation_status, smoking_sidiap, pc_visits, elixhauser_cat	13323	0.24529
6	sex, birth_range, occupation_status, smoking_esca, household_size, health_status	13291	0.250638
6	sex, birth_range, occupation_status, smoking_esca, household_size, bmi	13262	0.284193
6	sex, birth_range, occupation_status, smoking_esca, household_size, pc_visits	13303	0.249241
6	sex, birth_range, occupation_status, smoking_esca, household_size, elixhauser_cat	13303	0.266131
6	sex, birth_range, occupation_status, smoking_esca, health_status, bmi	13269	0.272743
6	sex, birth_range, occupation_status, smoking_esca, health_status, pc_visits	13310	0.234213
6	sex, birth_range, occupation_status, smoking_esca, health_status, elixhauser_cat	13310	0.258215
6	sex, birth_range, occupation_status, smoking_esca, bmi, pc_visits	13282	0.286129
6	sex, birth_range, occupation_status, smoking_esca, bmi, elixhauser_cat	13282	0.286779
6	sex, birth_range, occupation_status, smoking_esca, pc_visits, elixhauser_cat	13323	0.247158
6	sex, birth_range, occupation_status, household_size, health_status, bmi	13299	0.276929
6	sex, birth_range, occupation_status, household_size, health_status, pc_visits	13340	0.241267
6	sex, birth_range, occupation_status, household_size, health_status, elixhauser_cat	13340	0.264428
6	sex, birth_range, occupation_status, household_size, bmi, pc_visits	13312	0.287559
6	sex, birth_range, occupation_status, household_size, bmi, elixhauser_cat	13312	0.283722
6	sex, birth_range, occupation_status, household_size, pc_visits, elixhauser_cat	13353	0.249539
6	sex, birth_range, occupation_status, health_status, bmi, pc_visits	13318	0.269638
6	sex, birth_range, occupation_status, health_status, bmi, elixhauser_cat	13318	0.281626
6	sex, birth_range, occupation_status, health_status, pc_visits, elixhauser_cat	13359	0.244686
6	sex, birth_range, occupation_status, bmi, pc_visits, elixhauser_cat	13332	0.266262
6	sex, birth_range, smoking_sidiap, household_size, health_status, bmi	13305	0.280794
6	sex, birth_range, smoking_sidiap, household_size, health_status, pc_visits	13346	0.238326
6	sex, birth_range, smoking_sidiap, household_size, health_status, elixhauser_cat	13346	0.252207
6	sex, birth_range, smoking_sidiap, household_size, bmi, pc_visits	13319	0.305291
6	sex, birth_range, smoking_sidiap, household_size, bmi, elixhauser_cat	13319	0.277407
6	sex, birth_range, smoking_sidiap, household_size, pc_visits, elixhauser_cat	13360	0.248513
6	sex, birth_range, smoking_sidiap, health_status, bmi, pc_visits	13325	0.275929
6	sex, birth_range, smoking_sidiap, health_status, bmi, elixhauser_cat	13325	0.277806
6	sex, birth_range, smoking_sidiap, health_status, pc_visits, elixhauser_cat	13366	0.236851
6	sex, birth_range, smoking_sidiap, bmi, pc_visits, elixhauser_cat	13340	0.264348
6	sex, birth_range, smoking_esca, household_size, health_status, bmi	13305	0.281347
6	sex, birth_range, smoking_esca, household_size, health_status, pc_visits	13346	0.239516
6	sex, birth_range, smoking_esca, household_size, health_status, elixhauser_cat	13346	0.25418
6	sex, birth_range, smoking_esca, household_size, bmi, pc_visits	13319	0.305863
6	sex, birth_range, smoking_esca, household_size, bmi, elixhauser_cat	13319	0.277588
6	sex, birth_range, smoking_esca, household_size, pc_visits, elixhauser_cat	13360	0.249264
6	sex, birth_range, smoking_esca, health_status, bmi, pc_visits	13325	0.278349
6	sex, birth_range, smoking_esca, health_status, bmi, elixhauser_cat	13325	0.278646
6	sex, birth_range, smoking_esca, health_status, pc_visits, elixhauser_cat	13366	0.239073
6	sex, birth_range, smoking_esca, bmi, pc_visits, elixhauser_cat	13340	0.265385
6	sex, birth_range, household_size, health_status, bmi, pc_visits	13357	0.279197
6	sex, birth_range, household_size, health_status, bmi, elixhauser_cat	13357	0.282745
6	sex, birth_range, household_size, health_status, pc_visits, elixhauser_cat	13398	0.241614
6	sex, birth_range, household_size, bmi, pc_visits, elixhauser_cat	13372	0.272878
6	sex, birth_range, health_status, bmi, pc_visits, elixhauser_cat	13377	0.260746
7	sex, birth_range, deprivation_index, rurality, education_idescat, civil_status, employment	13093	0.298525
7	sex, birth_range, deprivation_index, rurality, education_idescat, civil_status, occupation_status	13093	0.296685
7	sex, birth_range, deprivation_index, rurality, education_idescat, civil_status, smoking_sidiap	13101	0.285554
7	sex, birth_range, deprivation_index, rurality, education_idescat, civil_status, smoking_esca	13101	0.284961
7	sex, birth_range, deprivation_index, rurality, education_idescat, civil_status, household_size	13134	0.298639
7	sex, birth_range, deprivation_index, rurality, education_idescat, civil_status, health_status	13135	0.303458
7	sex, birth_range, deprivation_index, rurality, education_idescat, civil_status, bmi	13111	0.313579
7	sex, birth_range, deprivation_index, rurality, education_idescat, civil_status, pc_visits	13151	0.29726
7	sex, birth_range, deprivation_index, rurality, education_idescat, civil_status, elixhauser_cat	13151	0.302072
7	sex, birth_range, deprivation_index, rurality, education_idescat, employment, smoking_sidiap	13064	0.287249
7	sex, birth_range, deprivation_index, rurality, education_idescat, employment, smoking_esca	13064	0.28551
7	sex, birth_range, deprivation_index, rurality, education_idescat, employment, household_size	13093	0.303272
7	sex, birth_range, deprivation_index, rurality, education_idescat, employment, health_status	13097	0.304389
7	sex, birth_range, deprivation_index, rurality, education_idescat, employment, bmi	13071	0.31642
7	sex, birth_range, deprivation_index, rurality, education_idescat, employment, pc_visits	13111	0.298524
7	sex, birth_range, deprivation_index, rurality, education_idescat, employment, elixhauser_cat	13111	0.305953
7	sex, birth_range, deprivation_index, rurality, education_idescat, occupation_status, smoking_sidiap	13064	0.284911
7	sex, birth_range, deprivation_index, rurality, education_idescat, occupation_status, smoking_esca	13064	0.283531
7	sex, birth_range, deprivation_index, rurality, education_idescat, occupation_status, household_size	13093	0.300261
7	sex, birth_range, deprivation_index, rurality, education_idescat, occupation_status, health_status	13097	0.292856
7	sex, birth_range, deprivation_index, rurality, education_idescat, occupation_status, bmi	13071	0.309197
7	sex, birth_range, deprivation_index, rurality, education_idescat, occupation_status, pc_visits	13111	0.279151
7	sex, birth_range, deprivation_index, rurality, education_idescat, occupation_status, elixhauser_cat	13111	0.302398
7	sex, birth_range, deprivation_index, rurality, education_idescat, smoking_sidiap, household_size	13102	0.286753
7	sex, birth_range, deprivation_index, rurality, education_idescat, smoking_sidiap, health_status	13106	0.290933
7	sex, birth_range, deprivation_index, rurality, education_idescat, smoking_sidiap, bmi	13081	0.309899
7	sex, birth_range, deprivation_index, rurality, education_idescat, smoking_sidiap, pc_visits	13121	0.287071
7	sex, birth_range, deprivation_index, rurality, education_idescat, smoking_sidiap, elixhauser_cat	13121	0.291862
7	sex, birth_range, deprivation_index, rurality, education_idescat, smoking_esca, household_size	13102	0.284725
7	sex, birth_range, deprivation_index, rurality, education_idescat, smoking_esca, health_status	13106	0.289424
7	sex, birth_range, deprivation_index, rurality, education_idescat, smoking_esca, bmi	13081	0.309607
7	sex, birth_range, deprivation_index, rurality, education_idescat, smoking_esca, pc_visits	13121	0.285741
7	sex, birth_range, deprivation_index, rurality, education_idescat, smoking_esca, elixhauser_cat	13121	0.291446
7	sex, birth_range, deprivation_index, rurality, education_idescat, household_size, health_status	13137	0.305692
7	sex, birth_range, deprivation_index, rurality, education_idescat, household_size, bmi	13112	0.317469
7	sex, birth_range, deprivation_index, rurality, education_idescat, household_size, pc_visits	13152	0.300954
7	sex, birth_range, deprivation_index, rurality, education_idescat, household_size, elixhauser_cat	13152	0.307153
7	sex, birth_range, deprivation_index, rurality, education_idescat, health_status, bmi	13115	0.320195
7	sex, birth_range, deprivation_index, rurality, education_idescat, health_status, pc_visits	13155	0.268788
7	sex, birth_range, deprivation_index, rurality, education_idescat, health_status, elixhauser_cat	13155	0.304509
7	sex, birth_range, deprivation_index, rurality, education_idescat, bmi, pc_visits	13131	0.335228
7	sex, birth_range, deprivation_index, rurality, education_idescat, bmi, elixhauser_cat	13131	0.3168
7	sex, birth_range, deprivation_index, rurality, education_idescat, pc_visits, elixhauser_cat	13171	0.284732
7	sex, birth_range, deprivation_index, rurality, education_esca, civil_status, employment	13093	0.296224
7	sex, birth_range, deprivation_index, rurality, education_esca, civil_status, occupation_status	13093	0.291523
7	sex, birth_range, deprivation_index, rurality, education_esca, civil_status, smoking_sidiap	13101	0.284023
7	sex, birth_range, deprivation_index, rurality, education_esca, civil_status, smoking_esca	13101	0.282686
7	sex, birth_range, deprivation_index, rurality, education_esca, civil_status, household_size	13134	0.295816
7	sex, birth_range, deprivation_index, rurality, education_esca, civil_status, health_status	13135	0.29963
7	sex, birth_range, deprivation_index, rurality, education_esca, civil_status, bmi	13111	0.311501
7	sex, birth_range, deprivation_index, rurality, education_esca, civil_status, pc_visits	13151	0.288186
7	sex, birth_range, deprivation_index, rurality, education_esca, civil_status, elixhauser_cat	13151	0.296517
7	sex, birth_range, deprivation_index, rurality, education_esca, employment, smoking_sidiap	13064	0.283701
7	sex, birth_range, deprivation_index, rurality, education_esca, employment, smoking_esca	13064	0.282277
7	sex, birth_range, deprivation_index, rurality, education_esca, employment, household_size	13093	0.298408
7	sex, birth_range, deprivation_index, rurality, education_esca, employment, health_status	13097	0.298622
7	sex, birth_range, deprivation_index, rurality, education_esca, employment, bmi	13071	0.312736
7	sex, birth_range, deprivation_index, rurality, education_esca, employment, pc_visits	13111	0.287273
7	sex, birth_range, deprivation_index, rurality, education_esca, employment, elixhauser_cat	13111	0.298457
7	sex, birth_range, deprivation_index, rurality, education_esca, occupation_status, smoking_sidiap	13064	0.281601
7	sex, birth_range, deprivation_index, rurality, education_esca, occupation_status, smoking_esca	13064	0.280321
7	sex, birth_range, deprivation_index, rurality, education_esca, occupation_status, household_size	13093	0.29233
7	sex, birth_range, deprivation_index, rurality, education_esca, occupation_status, health_status	13097	0.287552
7	sex, birth_range, deprivation_index, rurality, education_esca, occupation_status, bmi	13071	0.305524
7	sex, birth_range, deprivation_index, rurality, education_esca, occupation_status, pc_visits	13111	0.271405
7	sex, birth_range, deprivation_index, rurality, education_esca, occupation_status, elixhauser_cat	13111	0.291992
7	sex, birth_range, deprivation_index, rurality, education_esca, smoking_sidiap, household_size	13102	0.285451
7	sex, birth_range, deprivation_index, rurality, education_esca, smoking_sidiap, health_status	13106	0.28742
7	sex, birth_range, deprivation_index, rurality, education_esca, smoking_sidiap, bmi	13081	0.300958
7	sex, birth_range, deprivation_index, rurality, education_esca, smoking_sidiap, pc_visits	13121	0.277302
7	sex, birth_range, deprivation_index, rurality, education_esca, smoking_sidiap, elixhauser_cat	13121	0.286133
7	sex, birth_range, deprivation_index, rurality, education_esca, smoking_esca, household_size	13102	0.283969
7	sex, birth_range, deprivation_index, rurality, education_esca, smoking_esca, health_status	13106	0.286236
7	sex, birth_range, deprivation_index, rurality, education_esca, smoking_esca, bmi	13081	0.29993
7	sex, birth_range, deprivation_index, rurality, education_esca, smoking_esca, pc_visits	13121	0.27635
7	sex, birth_range, deprivation_index, rurality, education_esca, smoking_esca, elixhauser_cat	13121	0.285115
7	sex, birth_range, deprivation_index, rurality, education_esca, household_size, health_status	13137	0.301639
7	sex, birth_range, deprivation_index, rurality, education_esca, household_size, bmi	13112	0.311168
7	sex, birth_range, deprivation_index, rurality, education_esca, household_size, pc_visits	13152	0.291994
7	sex, birth_range, deprivation_index, rurality, education_esca, household_size, elixhauser_cat	13152	0.299739
7	sex, birth_range, deprivation_index, rurality, education_esca, health_status, bmi	13115	0.313046
7	sex, birth_range, deprivation_index, rurality, education_esca, health_status, pc_visits	13155	0.265135
7	sex, birth_range, deprivation_index, rurality, education_esca, health_status, elixhauser_cat	13155	0.296698
7	sex, birth_range, deprivation_index, rurality, education_esca, bmi, pc_visits	13131	0.325132
7	sex, birth_range, deprivation_index, rurality, education_esca, bmi, elixhauser_cat	13131	0.313793
7	sex, birth_range, deprivation_index, rurality, education_esca, pc_visits, elixhauser_cat	13171	0.280963
7	sex, birth_range, deprivation_index, rurality, civil_status, employment, smoking_sidiap	13073	0.287142
7	sex, birth_range, deprivation_index, rurality, civil_status, employment, smoking_esca	13073	0.286354
7	sex, birth_range, deprivation_index, rurality, civil_status, employment, household_size	13105	0.29526
7	sex, birth_range, deprivation_index, rurality, civil_status, employment, health_status	13108	0.300503
7	sex, birth_range, deprivation_index, rurality, civil_status, employment, bmi	13082	0.316268
7	sex, birth_range, deprivation_index, rurality, civil_status, employment, pc_visits	13122	0.292398
7	sex, birth_range, deprivation_index, rurality, civil_status, employment, elixhauser_cat	13122	0.298119
7	sex, birth_range, deprivation_index, rurality, civil_status, occupation_status, smoking_sidiap	13073	0.284828
7	sex, birth_range, deprivation_index, rurality, civil_status, occupation_status, smoking_esca	13073	0.284998
7	sex, birth_range, deprivation_index, rurality, civil_status, occupation_status, household_size	13105	0.290709
7	sex, birth_range, deprivation_index, rurality, civil_status, occupation_status, health_status	13108	0.288929
7	sex, birth_range, deprivation_index, rurality, civil_status, occupation_status, bmi	13082	0.308156
7	sex, birth_range, deprivation_index, rurality, civil_status, occupation_status, pc_visits	13122	0.274023
7	sex, birth_range, deprivation_index, rurality, civil_status, occupation_status, elixhauser_cat	13122	0.292586
7	sex, birth_range, deprivation_index, rurality, civil_status, smoking_sidiap, household_size	13111	0.28459
7	sex, birth_range, deprivation_index, rurality, civil_status, smoking_sidiap, health_status	13114	0.290116
7	sex, birth_range, deprivation_index, rurality, civil_status, smoking_sidiap, bmi	13089	0.306004
7	sex, birth_range, deprivation_index, rurality, civil_status, smoking_sidiap, pc_visits	13129	0.281268
7	sex, birth_range, deprivation_index, rurality, civil_status, smoking_sidiap, elixhauser_cat	13129	0.288307
7	sex, birth_range, deprivation_index, rurality, civil_status, smoking_esca, household_size	13111	0.284776
7	sex, birth_range, deprivation_index, rurality, civil_status, smoking_esca, health_status	13114	0.29086
7	sex, birth_range, deprivation_index, rurality, civil_status, smoking_esca, bmi	13089	0.306073
7	sex, birth_range, deprivation_index, rurality, civil_status, smoking_esca, pc_visits	13129	0.281607
7	sex, birth_range, deprivation_index, rurality, civil_status, smoking_esca, elixhauser_cat	13129	0.288501
7	sex, birth_range, deprivation_index, rurality, civil_status, household_size, health_status	13148	0.29861
7	sex, birth_range, deprivation_index, rurality, civil_status, household_size, bmi	13123	0.313097
7	sex, birth_range, deprivation_index, rurality, civil_status, household_size, pc_visits	13163	0.296726
7	sex, birth_range, deprivation_index, rurality, civil_status, household_size, elixhauser_cat	13163	0.295391
7	sex, birth_range, deprivation_index, rurality, civil_status, health_status, bmi	13125	0.316537
7	sex, birth_range, deprivation_index, rurality, civil_status, health_status, pc_visits	13165	0.271308
7	sex, birth_range, deprivation_index, rurality, civil_status, health_status, elixhauser_cat	13165	0.297414
7	sex, birth_range, deprivation_index, rurality, civil_status, bmi, pc_visits	13141	0.329052
7	sex, birth_range, deprivation_index, rurality, civil_status, bmi, elixhauser_cat	13141	0.31459
7	sex, birth_range, deprivation_index, rurality, civil_status, pc_visits, elixhauser_cat	13181	0.284286
7	sex, birth_range, deprivation_index, rurality, employment, smoking_sidiap, household_size	13073	0.285825
7	sex, birth_range, deprivation_index, rurality, employment, smoking_sidiap, health_status	13079	0.289542
7	sex, birth_range, deprivation_index, rurality, employment, smoking_sidiap, bmi	13052	0.306373
7	sex, birth_range, deprivation_index, rurality, employment, smoking_sidiap, pc_visits	13092	0.277531
7	sex, birth_range, deprivation_index, rurality, employment, smoking_sidiap, elixhauser_cat	13092	0.287709
7	sex, birth_range, deprivation_index, rurality, employment, smoking_esca, household_size	13073	0.285292
7	sex, birth_range, deprivation_index, rurality, employment, smoking_esca, health_status	13079	0.289388
7	sex, birth_range, deprivation_index, rurality, employment, smoking_esca, bmi	13052	0.3063
7	sex, birth_range, deprivation_index, rurality, employment, smoking_esca, pc_visits	13092	0.277208
7	sex, birth_range, deprivation_index, rurality, employment, smoking_esca, elixhauser_cat	13092	0.287055
7	sex, birth_range, deprivation_index, rurality, employment, household_size, health_status	13109	0.300305
7	sex, birth_range, deprivation_index, rurality, employment, household_size, bmi	13082	0.31336
7	sex, birth_range, deprivation_index, rurality, employment, household_size, pc_visits	13122	0.292208
7	sex, birth_range, deprivation_index, rurality, employment, household_size, elixhauser_cat	13122	0.297856
7	sex, birth_range, deprivation_index, rurality, employment, health_status, bmi	13087	0.316298
7	sex, birth_range, deprivation_index, rurality, employment, health_status, pc_visits	13127	0.269499
7	sex, birth_range, deprivation_index, rurality, employment, health_status, elixhauser_cat	13127	0.298331
7	sex, birth_range, deprivation_index, rurality, employment, bmi, pc_visits	13101	0.325895
7	sex, birth_range, deprivation_index, rurality, employment, bmi, elixhauser_cat	13101	0.31501
7	sex, birth_range, deprivation_index, rurality, employment, pc_visits, elixhauser_cat	13141	0.282409
7	sex, birth_range, deprivation_index, rurality, occupation_status, smoking_sidiap, household_size	13073	0.282223
7	sex, birth_range, deprivation_index, rurality, occupation_status, smoking_sidiap, health_status	13079	0.283292
7	sex, birth_range, deprivation_index, rurality, occupation_status, smoking_sidiap, bmi	13052	0.300081
7	sex, birth_range, deprivation_index, rurality, occupation_status, smoking_sidiap, pc_visits	13092	0.257759
7	sex, birth_range, deprivation_index, rurality, occupation_status, smoking_sidiap, elixhauser_cat	13092	0.284069
7	sex, birth_range, deprivation_index, rurality, occupation_status, smoking_esca, household_size	13073	0.282356
7	sex, birth_range, deprivation_index, rurality, occupation_status, smoking_esca, health_status	13079	0.284536
7	sex, birth_range, deprivation_index, rurality, occupation_status, smoking_esca, bmi	13052	0.299621
7	sex, birth_range, deprivation_index, rurality, occupation_status, smoking_esca, pc_visits	13092	0.258231
7	sex, birth_range, deprivation_index, rurality, occupation_status, smoking_esca, elixhauser_cat	13092	0.284671
7	sex, birth_range, deprivation_index, rurality, occupation_status, household_size, health_status	13109	0.288771
7	sex, birth_range, deprivation_index, rurality, occupation_status, household_size, bmi	13082	0.303647
7	sex, birth_range, deprivation_index, rurality, occupation_status, household_size, pc_visits	13122	0.27216
7	sex, birth_range, deprivation_index, rurality, occupation_status, household_size, elixhauser_cat	13122	0.291301
7	sex, birth_range, deprivation_index, rurality, occupation_status, health_status, bmi	13087	0.305768
7	sex, birth_range, deprivation_index, rurality, occupation_status, health_status, pc_visits	13127	0.253762
7	sex, birth_range, deprivation_index, rurality, occupation_status, health_status, elixhauser_cat	13127	0.28567
7	sex, birth_range, deprivation_index, rurality, occupation_status, bmi, pc_visits	13101	0.302803
7	sex, birth_range, deprivation_index, rurality, occupation_status, bmi, elixhauser_cat	13101	0.309848
7	sex, birth_range, deprivation_index, rurality, occupation_status, pc_visits, elixhauser_cat	13141	0.271125
7	sex, birth_range, deprivation_index, rurality, smoking_sidiap, household_size, health_status	13116	0.289792
7	sex, birth_range, deprivation_index, rurality, smoking_sidiap, household_size, bmi	13090	0.305004
7	sex, birth_range, deprivation_index, rurality, smoking_sidiap, household_size, pc_visits	13130	0.284227
7	sex, birth_range, deprivation_index, rurality, smoking_sidiap, household_size, elixhauser_cat	13130	0.287321
7	sex, birth_range, deprivation_index, rurality, smoking_sidiap, health_status, bmi	13095	0.305634
7	sex, birth_range, deprivation_index, rurality, smoking_sidiap, health_status, pc_visits	13135	0.259997
7	sex, birth_range, deprivation_index, rurality, smoking_sidiap, health_status, elixhauser_cat	13135	0.287947
7	sex, birth_range, deprivation_index, rurality, smoking_sidiap, bmi, pc_visits	13110	0.318038
7	sex, birth_range, deprivation_index, rurality, smoking_sidiap, bmi, elixhauser_cat	13110	0.302454
7	sex, birth_range, deprivation_index, rurality, smoking_sidiap, pc_visits, elixhauser_cat	13150	0.270571
7	sex, birth_range, deprivation_index, rurality, smoking_esca, household_size, health_status	13116	0.289881
7	sex, birth_range, deprivation_index, rurality, smoking_esca, household_size, bmi	13090	0.305834
7	sex, birth_range, deprivation_index, rurality, smoking_esca, household_size, pc_visits	13130	0.284568
7	sex, birth_range, deprivation_index, rurality, smoking_esca, household_size, elixhauser_cat	13130	0.28751
7	sex, birth_range, deprivation_index, rurality, smoking_esca, health_status, bmi	13095	0.305838
7	sex, birth_range, deprivation_index, rurality, smoking_esca, health_status, pc_visits	13135	0.259918
7	sex, birth_range, deprivation_index, rurality, smoking_esca, health_status, elixhauser_cat	13135	0.288187
7	sex, birth_range, deprivation_index, rurality, smoking_esca, bmi, pc_visits	13110	0.317748
7	sex, birth_range, deprivation_index, rurality, smoking_esca, bmi, elixhauser_cat	13110	0.301473
7	sex, birth_range, deprivation_index, rurality, smoking_esca, pc_visits, elixhauser_cat	13150	0.270284
7	sex, birth_range, deprivation_index, rurality, household_size, health_status, bmi	13127	0.313753
7	sex, birth_range, deprivation_index, rurality, household_size, health_status, pc_visits	13167	0.271811
7	sex, birth_range, deprivation_index, rurality, household_size, health_status, elixhauser_cat	13167	0.298099
7	sex, birth_range, deprivation_index, rurality, household_size, bmi, pc_visits	13142	0.33179
7	sex, birth_range, deprivation_index, rurality, household_size, bmi, elixhauser_cat	13142	0.312673
7	sex, birth_range, deprivation_index, rurality, household_size, pc_visits, elixhauser_cat	13182	0.282733
7	sex, birth_range, deprivation_index, rurality, health_status, bmi, pc_visits	13146	0.301936
7	sex, birth_range, deprivation_index, rurality, health_status, bmi, elixhauser_cat	13146	0.31583
7	sex, birth_range, deprivation_index, rurality, health_status, pc_visits, elixhauser_cat	13186	0.270634
7	sex, birth_range, deprivation_index, rurality, bmi, pc_visits, elixhauser_cat	13162	0.295068
7	sex, birth_range, deprivation_index, education_idescat, civil_status, employment, smoking_sidiap	13046	0.280924
7	sex, birth_range, deprivation_index, education_idescat, civil_status, employment, smoking_esca	13046	0.281504
7	sex, birth_range, deprivation_index, education_idescat, civil_status, employment, household_size	13077	0.294647
7	sex, birth_range, deprivation_index, education_idescat, civil_status, employment, health_status	13079	0.29935
7	sex, birth_range, deprivation_index, education_idescat, civil_status, employment, bmi	13053	0.310304
7	sex, birth_range, deprivation_index, education_idescat, civil_status, employment, pc_visits	13093	0.286989
7	sex, birth_range, deprivation_index, education_idescat, civil_status, employment, elixhauser_cat	13093	0.297701
7	sex, birth_range, deprivation_index, education_idescat, civil_status, occupation_status, smoking_sidiap	13046	0.279467
7	sex, birth_range, deprivation_index, education_idescat, civil_status, occupation_status, smoking_esca	13046	0.278567
7	sex, birth_range, deprivation_index, education_idescat, civil_status, occupation_status, household_size	13077	0.291705
7	sex, birth_range, deprivation_index, education_idescat, civil_status, occupation_status, health_status	13079	0.287258
7	sex, birth_range, deprivation_index, education_idescat, civil_status, occupation_status, bmi	13053	0.304076
7	sex, birth_range, deprivation_index, education_idescat, civil_status, occupation_status, pc_visits	13093	0.269836
7	sex, birth_range, deprivation_index, education_idescat, civil_status, occupation_status, elixhauser_cat	13093	0.293911
7	sex, birth_range, deprivation_index, education_idescat, civil_status, smoking_sidiap, household_size	13084	0.28104
7	sex, birth_range, deprivation_index, education_idescat, civil_status, smoking_sidiap, health_status	13086	0.289443
7	sex, birth_range, deprivation_index, education_idescat, civil_status, smoking_sidiap, bmi	13061	0.306252
7	sex, birth_range, deprivation_index, education_idescat, civil_status, smoking_sidiap, pc_visits	13101	0.277026
7	sex, birth_range, deprivation_index, education_idescat, civil_status, smoking_sidiap, elixhauser_cat	13101	0.286794
7	sex, birth_range, deprivation_index, education_idescat, civil_status, smoking_esca, household_size	13084	0.281316
7	sex, birth_range, deprivation_index, education_idescat, civil_status, smoking_esca, health_status	13086	0.288423
7	sex, birth_range, deprivation_index, education_idescat, civil_status, smoking_esca, bmi	13061	0.306807
7	sex, birth_range, deprivation_index, education_idescat, civil_status, smoking_esca, pc_visits	13101	0.27687
7	sex, birth_range, deprivation_index, education_idescat, civil_status, smoking_esca, elixhauser_cat	13101	0.286958
7	sex, birth_range, deprivation_index, education_idescat, civil_status, household_size, health_status	13119	0.300208
7	sex, birth_range, deprivation_index, education_idescat, civil_status, household_size, bmi	13094	0.311887
7	sex, birth_range, deprivation_index, education_idescat, civil_status, household_size, pc_visits	13134	0.291419
7	sex, birth_range, deprivation_index, education_idescat, civil_status, household_size, elixhauser_cat	13134	0.300623
7	sex, birth_range, deprivation_index, education_idescat, civil_status, health_status, bmi	13095	0.317208
7	sex, birth_range, deprivation_index, education_idescat, civil_status, health_status, pc_visits	13135	0.264118
7	sex, birth_range, deprivation_index, education_idescat, civil_status, health_status, elixhauser_cat	13135	0.29928
7	sex, birth_range, deprivation_index, education_idescat, civil_status, bmi, pc_visits	13111	0.325616
7	sex, birth_range, deprivation_index, education_idescat, civil_status, bmi, elixhauser_cat	13111	0.311278
7	sex, birth_range, deprivation_index, education_idescat, civil_status, pc_visits, elixhauser_cat	13151	0.278424
7	sex, birth_range, deprivation_index, education_idescat, employment, smoking_sidiap, household_size	13046	0.282844
7	sex, birth_range, deprivation_index, education_idescat, employment, smoking_sidiap, health_status	13051	0.286186
7	sex, birth_range, deprivation_index, education_idescat, employment, smoking_sidiap, bmi	13024	0.30762
7	sex, birth_range, deprivation_index, education_idescat, employment, smoking_sidiap, pc_visits	13064	0.279382
7	sex, birth_range, deprivation_index, education_idescat, employment, smoking_sidiap, elixhauser_cat	13064	0.287514
7	sex, birth_range, deprivation_index, education_idescat, employment, smoking_esca, household_size	13046	0.282598
7	sex, birth_range, deprivation_index, education_idescat, employment, smoking_esca, health_status	13051	0.284623
7	sex, birth_range, deprivation_index, education_idescat, employment, smoking_esca, bmi	13024	0.307851
7	sex, birth_range, deprivation_index, education_idescat, employment, smoking_esca, pc_visits	13064	0.27955
7	sex, birth_range, deprivation_index, education_idescat, employment, smoking_esca, elixhauser_cat	13064	0.286761
7	sex, birth_range, deprivation_index, education_idescat, employment, household_size, health_status	13080	0.301601
7	sex, birth_range, deprivation_index, education_idescat, employment, household_size, bmi	13053	0.315009
7	sex, birth_range, deprivation_index, education_idescat, employment, household_size, pc_visits	13093	0.290266
7	sex, birth_range, deprivation_index, education_idescat, employment, household_size, elixhauser_cat	13093	0.303429
7	sex, birth_range, deprivation_index, education_idescat, employment, health_status, bmi	13057	0.315791
7	sex, birth_range, deprivation_index, education_idescat, employment, health_status, pc_visits	13097	0.263381
7	sex, birth_range, deprivation_index, education_idescat, employment, health_status, elixhauser_cat	13097	0.29971
7	sex, birth_range, deprivation_index, education_idescat, employment, bmi, pc_visits	13071	0.327263
7	sex, birth_range, deprivation_index, education_idescat, employment, bmi, elixhauser_cat	13071	0.314347
7	sex, birth_range, deprivation_index, education_idescat, employment, pc_visits, elixhauser_cat	13111	0.279604
7	sex, birth_range, deprivation_index, education_idescat, occupation_status, smoking_sidiap, household_size	13046	0.279383
7	sex, birth_range, deprivation_index, education_idescat, occupation_status, smoking_sidiap, health_status	13051	0.276813
7	sex, birth_range, deprivation_index, education_idescat, occupation_status, smoking_sidiap, bmi	13024	0.297336
7	sex, birth_range, deprivation_index, education_idescat, occupation_status, smoking_sidiap, pc_visits	13064	0.259648
7	sex, birth_range, deprivation_index, education_idescat, occupation_status, smoking_sidiap, elixhauser_cat	13064	0.28265
7	sex, birth_range, deprivation_index, education_idescat, occupation_status, smoking_esca, household_size	13046	0.276828
7	sex, birth_range, deprivation_index, education_idescat, occupation_status, smoking_esca, health_status	13051	0.275947
7	sex, birth_range, deprivation_index, education_idescat, occupation_status, smoking_esca, bmi	13024	0.297746
7	sex, birth_range, deprivation_index, education_idescat, occupation_status, smoking_esca, pc_visits	13064	0.259296
7	sex, birth_range, deprivation_index, education_idescat, occupation_status, smoking_esca, elixhauser_cat	13064	0.28158
7	sex, birth_range, deprivation_index, education_idescat, occupation_status, household_size, health_status	13080	0.288945
7	sex, birth_range, deprivation_index, education_idescat, occupation_status, household_size, bmi	13053	0.305622
7	sex, birth_range, deprivation_index, education_idescat, occupation_status, household_size, pc_visits	13093	0.272779
7	sex, birth_range, deprivation_index, education_idescat, occupation_status, household_size, elixhauser_cat	13093	0.298358
7	sex, birth_range, deprivation_index, education_idescat, occupation_status, health_status, bmi	13057	0.303146
7	sex, birth_range, deprivation_index, education_idescat, occupation_status, health_status, pc_visits	13097	0.252049
7	sex, birth_range, deprivation_index, education_idescat, occupation_status, health_status, elixhauser_cat	13097	0.287874
7	sex, birth_range, deprivation_index, education_idescat, occupation_status, bmi, pc_visits	13071	0.304689
7	sex, birth_range, deprivation_index, education_idescat, occupation_status, bmi, elixhauser_cat	13071	0.311712
7	sex, birth_range, deprivation_index, education_idescat, occupation_status, pc_visits, elixhauser_cat	13111	0.267788
7	sex, birth_range, deprivation_index, education_idescat, smoking_sidiap, household_size, health_status	13088	0.288123
7	sex, birth_range, deprivation_index, education_idescat, smoking_sidiap, household_size, bmi	13062	0.310156
7	sex, birth_range, deprivation_index, education_idescat, smoking_sidiap, household_size, pc_visits	13102	0.279652
7	sex, birth_range, deprivation_index, education_idescat, smoking_sidiap, household_size, elixhauser_cat	13102	0.288743
7	sex, birth_range, deprivation_index, education_idescat, smoking_sidiap, health_status, bmi	13066	0.304939
7	sex, birth_range, deprivation_index, education_idescat, smoking_sidiap, health_status, pc_visits	13106	0.251486
7	sex, birth_range, deprivation_index, education_idescat, smoking_sidiap, health_status, elixhauser_cat	13106	0.288515
7	sex, birth_range, deprivation_index, education_idescat, smoking_sidiap, bmi, pc_visits	13081	0.319366
7	sex, birth_range, deprivation_index, education_idescat, smoking_sidiap, bmi, elixhauser_cat	13081	0.304253
7	sex, birth_range, deprivation_index, education_idescat, smoking_sidiap, pc_visits, elixhauser_cat	13121	0.263948
7	sex, birth_range, deprivation_index, education_idescat, smoking_esca, household_size, health_status	13088	0.286595
7	sex, birth_range, deprivation_index, education_idescat, smoking_esca, household_size, bmi	13062	0.310167
7	sex, birth_range, deprivation_index, education_idescat, smoking_esca, household_size, pc_visits	13102	0.279974
7	sex, birth_range, deprivation_index, education_idescat, smoking_esca, household_size, elixhauser_cat	13102	0.287273
7	sex, birth_range, deprivation_index, education_idescat, smoking_esca, health_status, bmi	13066	0.302969
7	sex, birth_range, deprivation_index, education_idescat, smoking_esca, health_status, pc_visits	13106	0.250697
7	sex, birth_range, deprivation_index, education_idescat, smoking_esca, health_status, elixhauser_cat	13106	0.28725
7	sex, birth_range, deprivation_index, education_idescat, smoking_esca, bmi, pc_visits	13081	0.319481
7	sex, birth_range, deprivation_index, education_idescat, smoking_esca, bmi, elixhauser_cat	13081	0.303411
7	sex, birth_range, deprivation_index, education_idescat, smoking_esca, pc_visits, elixhauser_cat	13121	0.263664
7	sex, birth_range, deprivation_index, education_idescat, household_size, health_status, bmi	13097	0.318848
7	sex, birth_range, deprivation_index, education_idescat, household_size, health_status, pc_visits	13137	0.265407
7	sex, birth_range, deprivation_index, education_idescat, household_size, health_status, elixhauser_cat	13137	0.302633
7	sex, birth_range, deprivation_index, education_idescat, household_size, bmi, pc_visits	13112	0.330666
7	sex, birth_range, deprivation_index, education_idescat, household_size, bmi, elixhauser_cat	13112	0.315211
7	sex, birth_range, deprivation_index, education_idescat, household_size, pc_visits, elixhauser_cat	13152	0.279828
7	sex, birth_range, deprivation_index, education_idescat, health_status, bmi, pc_visits	13115	0.299827
7	sex, birth_range, deprivation_index, education_idescat, health_status, bmi, elixhauser_cat	13115	0.316226
7	sex, birth_range, deprivation_index, education_idescat, health_status, pc_visits, elixhauser_cat	13155	0.265315
7	sex, birth_range, deprivation_index, education_idescat, bmi, pc_visits, elixhauser_cat	13131	0.289042
7	sex, birth_range, deprivation_index, education_esca, civil_status, employment, smoking_sidiap	13046	0.278084
7	sex, birth_range, deprivation_index, education_esca, civil_status, employment, smoking_esca	13046	0.277516
7	sex, birth_range, deprivation_index, education_esca, civil_status, employment, household_size	13077	0.288496
7	sex, birth_range, deprivation_index, education_esca, civil_status, employment, health_status	13079	0.29158
7	sex, birth_range, deprivation_index, education_esca, civil_status, employment, bmi	13053	0.306432
7	sex, birth_range, deprivation_index, education_esca, civil_status, employment, pc_visits	13093	0.277039
7	sex, birth_range, deprivation_index, education_esca, civil_status, employment, elixhauser_cat	13093	0.289472
7	sex, birth_range, deprivation_index, education_esca, civil_status, occupation_status, smoking_sidiap	13046	0.275802
7	sex, birth_range, deprivation_index, education_esca, civil_status, occupation_status, smoking_esca	13046	0.275652
7	sex, birth_range, deprivation_index, education_esca, civil_status, occupation_status, household_size	13077	0.283196
7	sex, birth_range, deprivation_index, education_esca, civil_status, occupation_status, health_status	13079	0.281499
7	sex, birth_range, deprivation_index, education_esca, civil_status, occupation_status, bmi	13053	0.29993
7	sex, birth_range, deprivation_index, education_esca, civil_status, occupation_status, pc_visits	13093	0.26227
7	sex, birth_range, deprivation_index, education_esca, civil_status, occupation_status, elixhauser_cat	13093	0.283393
7	sex, birth_range, deprivation_index, education_esca, civil_status, smoking_sidiap, household_size	13084	0.279759
7	sex, birth_range, deprivation_index, education_esca, civil_status, smoking_sidiap, health_status	13086	0.283046
7	sex, birth_range, deprivation_index, education_esca, civil_status, smoking_sidiap, bmi	13061	0.297795
7	sex, birth_range, deprivation_index, education_esca, civil_status, smoking_sidiap, pc_visits	13101	0.268899
7	sex, birth_range, deprivation_index, education_esca, civil_status, smoking_sidiap, elixhauser_cat	13101	0.281497
7	sex, birth_range, deprivation_index, education_esca, civil_status, smoking_esca, household_size	13084	0.279712
7	sex, birth_range, deprivation_index, education_esca, civil_status, smoking_esca, health_status	13086	0.283186
7	sex, birth_range, deprivation_index, education_esca, civil_status, smoking_esca, bmi	13061	0.297995
7	sex, birth_range, deprivation_index, education_esca, civil_status, smoking_esca, pc_visits	13101	0.268889
7	sex, birth_range, deprivation_index, education_esca, civil_status, smoking_esca, elixhauser_cat	13101	0.281825
7	sex, birth_range, deprivation_index, education_esca, civil_status, household_size, health_status	13119	0.293791
7	sex, birth_range, deprivation_index, education_esca, civil_status, household_size, bmi	13094	0.303933
7	sex, birth_range, deprivation_index, education_esca, civil_status, household_size, pc_visits	13134	0.283851
7	sex, birth_range, deprivation_index, education_esca, civil_status, household_size, elixhauser_cat	13134	0.290033
7	sex, birth_range, deprivation_index, education_esca, civil_status, health_status, bmi	13095	0.308485
7	sex, birth_range, deprivation_index, education_esca, civil_status, health_status, pc_visits	13135	0.260985
7	sex, birth_range, deprivation_index, education_esca, civil_status, health_status, elixhauser_cat	13135	0.289726
7	sex, birth_range, deprivation_index, education_esca, civil_status, bmi, pc_visits	13111	0.316698
7	sex, birth_range, deprivation_index, education_esca, civil_status, bmi, elixhauser_cat	13111	0.308779
7	sex, birth_range, deprivation_index, education_esca, civil_status, pc_visits, elixhauser_cat	13151	0.274885
7	sex, birth_range, deprivation_index, education_esca, employment, smoking_sidiap, household_size	13046	0.279609
7	sex, birth_range, deprivation_index, education_esca, employment, smoking_sidiap, health_status	13051	0.279849
7	sex, birth_range, deprivation_index, education_esca, employment, smoking_sidiap, bmi	13024	0.29814
7	sex, birth_range, deprivation_index, education_esca, employment, smoking_sidiap, pc_visits	13064	0.267418
7	sex, birth_range, deprivation_index, education_esca, employment, smoking_sidiap, elixhauser_cat	13064	0.280808
7	sex, birth_range, deprivation_index, education_esca, employment, smoking_esca, household_size	13046	0.278995
7	sex, birth_range, deprivation_index, education_esca, employment, smoking_esca, health_status	13051	0.279335
7	sex, birth_range, deprivation_index, education_esca, employment, smoking_esca, bmi	13024	0.298165
7	sex, birth_range, deprivation_index, education_esca, employment, smoking_esca, pc_visits	13064	0.267533
7	sex, birth_range, deprivation_index, education_esca, employment, smoking_esca, elixhauser_cat	13064	0.28057
7	sex, birth_range, deprivation_index, education_esca, employment, household_size, health_status	13080	0.293685
7	sex, birth_range, deprivation_index, education_esca, employment, household_size, bmi	13053	0.307196
7	sex, birth_range, deprivation_index, education_esca, employment, household_size, pc_visits	13093	0.281277
7	sex, birth_range, deprivation_index, education_esca, employment, household_size, elixhauser_cat	13093	0.293041
7	sex, birth_range, deprivation_index, education_esca, employment, health_status, bmi	13057	0.306397
7	sex, birth_range, deprivation_index, education_esca, employment, health_status, pc_visits	13097	0.259117
7	sex, birth_range, deprivation_index, education_esca, employment, health_status, elixhauser_cat	13097	0.289095
7	sex, birth_range, deprivation_index, education_esca, employment, bmi, pc_visits	13071	0.315911
7	sex, birth_range, deprivation_index, education_esca, employment, bmi, elixhauser_cat	13071	0.309678
7	sex, birth_range, deprivation_index, education_esca, employment, pc_visits, elixhauser_cat	13111	0.274661
7	sex, birth_range, deprivation_index, education_esca, occupation_status, smoking_sidiap, household_size	13046	0.276144
7	sex, birth_range, deprivation_index, education_esca, occupation_status, smoking_sidiap, health_status	13051	0.272345
7	sex, birth_range, deprivation_index, education_esca, occupation_status, smoking_sidiap, bmi	13024	0.292629
7	sex, birth_range, deprivation_index, education_esca, occupation_status, smoking_sidiap, pc_visits	13064	0.250948
7	sex, birth_range, deprivation_index, education_esca, occupation_status, smoking_sidiap, elixhauser_cat	13064	0.276766
7	sex, birth_range, deprivation_index, education_esca, occupation_status, smoking_esca, household_size	13046	0.275934
7	sex, birth_range, deprivation_index, education_esca, occupation_status, smoking_esca, health_status	13051	0.272559
7	sex, birth_range, deprivation_index, education_esca, occupation_status, smoking_esca, bmi	13024	0.290916
7	sex, birth_range, deprivation_index, education_esca, occupation_status, smoking_esca, pc_visits	13064	0.250809
7	sex, birth_range, deprivation_index, education_esca, occupation_status, smoking_esca, elixhauser_cat	13064	0.276652
7	sex, birth_range, deprivation_index, education_esca, occupation_status, household_size, health_status	13080	0.283229
7	sex, birth_range, deprivation_index, education_esca, occupation_status, household_size, bmi	13053	0.29912
7	sex, birth_range, deprivation_index, education_esca, occupation_status, household_size, pc_visits	13093	0.264885
7	sex, birth_range, deprivation_index, education_esca, occupation_status, household_size, elixhauser_cat	13093	0.285526
7	sex, birth_range, deprivation_index, education_esca, occupation_status, health_status, bmi	13057	0.29631
7	sex, birth_range, deprivation_index, education_esca, occupation_status, health_status, pc_visits	13097	0.244577
7	sex, birth_range, deprivation_index, education_esca, occupation_status, health_status, elixhauser_cat	13097	0.278513
7	sex, birth_range, deprivation_index, education_esca, occupation_status, bmi, pc_visits	13071	0.293831
7	sex, birth_range, deprivation_index, education_esca, occupation_status, bmi, elixhauser_cat	13071	0.303585
7	sex, birth_range, deprivation_index, education_esca, occupation_status, pc_visits, elixhauser_cat	13111	0.265497
7	sex, birth_range, deprivation_index, education_esca, smoking_sidiap, household_size, health_status	13088	0.283025
7	sex, birth_range, deprivation_index, education_esca, smoking_sidiap, household_size, bmi	13062	0.300085
7	sex, birth_range, deprivation_index, education_esca, smoking_sidiap, household_size, pc_visits	13102	0.272712
7	sex, birth_range, deprivation_index, education_esca, smoking_sidiap, household_size, elixhauser_cat	13102	0.283445
7	sex, birth_range, deprivation_index, education_esca, smoking_sidiap, health_status, bmi	13066	0.297516
7	sex, birth_range, deprivation_index, education_esca, smoking_sidiap, health_status, pc_visits	13106	0.247726
7	sex, birth_range, deprivation_index, education_esca, smoking_sidiap, health_status, elixhauser_cat	13106	0.279578
7	sex, birth_range, deprivation_index, education_esca, smoking_sidiap, bmi, pc_visits	13081	0.30919
7	sex, birth_range, deprivation_index, education_esca, smoking_sidiap, bmi, elixhauser_cat	13081	0.297835
7	sex, birth_range, deprivation_index, education_esca, smoking_sidiap, pc_visits, elixhauser_cat	13121	0.262699
7	sex, birth_range, deprivation_index, education_esca, smoking_esca, household_size, health_status	13088	0.282101
7	sex, birth_range, deprivation_index, education_esca, smoking_esca, household_size, bmi	13062	0.300795
7	sex, birth_range, deprivation_index, education_esca, smoking_esca, household_size, pc_visits	13102	0.27308
7	sex, birth_range, deprivation_index, education_esca, smoking_esca, household_size, elixhauser_cat	13102	0.283489
7	sex, birth_range, deprivation_index, education_esca, smoking_esca, health_status, bmi	13066	0.296746
7	sex, birth_range, deprivation_index, education_esca, smoking_esca, health_status, pc_visits	13106	0.247196
7	sex, birth_range, deprivation_index, education_esca, smoking_esca, health_status, elixhauser_cat	13106	0.279536
7	sex, birth_range, deprivation_index, education_esca, smoking_esca, bmi, pc_visits	13081	0.309053
7	sex, birth_range, deprivation_index, education_esca, smoking_esca, bmi, elixhauser_cat	13081	0.296359
7	sex, birth_range, deprivation_index, education_esca, smoking_esca, pc_visits, elixhauser_cat	13121	0.262235
7	sex, birth_range, deprivation_index, education_esca, household_size, health_status, bmi	13097	0.308654
7	sex, birth_range, deprivation_index, education_esca, household_size, health_status, pc_visits	13137	0.260788
7	sex, birth_range, deprivation_index, education_esca, household_size, health_status, elixhauser_cat	13137	0.292237
7	sex, birth_range, deprivation_index, education_esca, household_size, bmi, pc_visits	13112	0.320685
7	sex, birth_range, deprivation_index, education_esca, household_size, bmi, elixhauser_cat	13112	0.310715
7	sex, birth_range, deprivation_index, education_esca, household_size, pc_visits, elixhauser_cat	13152	0.277495
7	sex, birth_range, deprivation_index, education_esca, health_status, bmi, pc_visits	13115	0.28775
7	sex, birth_range, deprivation_index, education_esca, health_status, bmi, elixhauser_cat	13115	0.308304
7	sex, birth_range, deprivation_index, education_esca, health_status, pc_visits, elixhauser_cat	13155	0.260173
7	sex, birth_range, deprivation_index, education_esca, bmi, pc_visits, elixhauser_cat	13131	0.285219
7	sex, birth_range, deprivation_index, civil_status, employment, smoking_sidiap, household_size	13056	0.280334
7	sex, birth_range, deprivation_index, civil_status, employment, smoking_sidiap, health_status	13060	0.284493
7	sex, birth_range, deprivation_index, civil_status, employment, smoking_sidiap, bmi	13033	0.303613
7	sex, birth_range, deprivation_index, civil_status, employment, smoking_sidiap, pc_visits	13073	0.270012
7	sex, birth_range, deprivation_index, civil_status, employment, smoking_sidiap, elixhauser_cat	13073	0.284162
7	sex, birth_range, deprivation_index, civil_status, employment, smoking_esca, household_size	13056	0.280595
7	sex, birth_range, deprivation_index, civil_status, employment, smoking_esca, health_status	13060	0.284835
7	sex, birth_range, deprivation_index, civil_status, employment, smoking_esca, bmi	13033	0.304336
7	sex, birth_range, deprivation_index, civil_status, employment, smoking_esca, pc_visits	13073	0.270523
7	sex, birth_range, deprivation_index, civil_status, employment, smoking_esca, elixhauser_cat	13073	0.284895
7	sex, birth_range, deprivation_index, civil_status, employment, household_size, health_status	13092	0.293448
7	sex, birth_range, deprivation_index, civil_status, employment, household_size, bmi	13065	0.309497
7	sex, birth_range, deprivation_index, civil_status, employment, household_size, pc_visits	13105	0.285986
7	sex, birth_range, deprivation_index, civil_status, employment, household_size, elixhauser_cat	13105	0.291282
7	sex, birth_range, deprivation_index, civil_status, employment, health_status, bmi	13068	0.312147
7	sex, birth_range, deprivation_index, civil_status, employment, health_status, pc_visits	13108	0.266834
7	sex, birth_range, deprivation_index, civil_status, employment, health_status, elixhauser_cat	13108	0.292223
7	sex, birth_range, deprivation_index, civil_status, employment, bmi, pc_visits	13082	0.320041
7	sex, birth_range, deprivation_index, civil_status, employment, bmi, elixhauser_cat	13082	0.3119
7	sex, birth_range, deprivation_index, civil_status, employment, pc_visits, elixhauser_cat	13122	0.278916
7	sex, birth_range, deprivation_index, civil_status, occupation_status, smoking_sidiap, household_size	13056	0.277437
7	sex, birth_range, deprivation_index, civil_status, occupation_status, smoking_sidiap, health_status	13060	0.27782
7	sex, birth_range, deprivation_index, civil_status, occupation_status, smoking_sidiap, bmi	13033	0.298252
7	sex, birth_range, deprivation_index, civil_status, occupation_status, smoking_sidiap, pc_visits	13073	0.255689
7	sex, birth_range, deprivation_index, civil_status, occupation_status, smoking_sidiap, elixhauser_cat	13073	0.280945
7	sex, birth_range, deprivation_index, civil_status, occupation_status, smoking_esca, household_size	13056	0.277757
7	sex, birth_range, deprivation_index, civil_status, occupation_status, smoking_esca, health_status	13060	0.278518
7	sex, birth_range, deprivation_index, civil_status, occupation_status, smoking_esca, bmi	13033	0.298858
7	sex, birth_range, deprivation_index, civil_status, occupation_status, smoking_esca, pc_visits	13073	0.25707
7	sex, birth_range, deprivation_index, civil_status, occupation_status, smoking_esca, elixhauser_cat	13073	0.281845
7	sex, birth_range, deprivation_index, civil_status, occupation_status, household_size, health_status	13092	0.283302
7	sex, birth_range, deprivation_index, civil_status, occupation_status, household_size, bmi	13065	0.29899
7	sex, birth_range, deprivation_index, civil_status, occupation_status, household_size, pc_visits	13105	0.267306
7	sex, birth_range, deprivation_index, civil_status, occupation_status, household_size, elixhauser_cat	13105	0.285392
7	sex, birth_range, deprivation_index, civil_status, occupation_status, health_status, bmi	13068	0.301544
7	sex, birth_range, deprivation_index, civil_status, occupation_status, health_status, pc_visits	13108	0.252857
7	sex, birth_range, deprivation_index, civil_status, occupation_status, health_status, elixhauser_cat	13108	0.28099
7	sex, birth_range, deprivation_index, civil_status, occupation_status, bmi, pc_visits	13082	0.298736
7	sex, birth_range, deprivation_index, civil_status, occupation_status, bmi, elixhauser_cat	13082	0.306774
7	sex, birth_range, deprivation_index, civil_status, occupation_status, pc_visits, elixhauser_cat	13122	0.268274
7	sex, birth_range, deprivation_index, civil_status, smoking_sidiap, household_size, health_status	13097	0.284836
7	sex, birth_range, deprivation_index, civil_status, smoking_sidiap, household_size, bmi	13071	0.302266
7	sex, birth_range, deprivation_index, civil_status, smoking_sidiap, household_size, pc_visits	13111	0.278437
7	sex, birth_range, deprivation_index, civil_status, smoking_sidiap, household_size, elixhauser_cat	13111	0.284032
7	sex, birth_range, deprivation_index, civil_status, smoking_sidiap, health_status, bmi	13074	0.30263
7	sex, birth_range, deprivation_index, civil_status, smoking_sidiap, health_status, pc_visits	13114	0.257071
7	sex, birth_range, deprivation_index, civil_status, smoking_sidiap, health_status, elixhauser_cat	13114	0.283453
7	sex, birth_range, deprivation_index, civil_status, smoking_sidiap, bmi, pc_visits	13089	0.313313
7	sex, birth_range, deprivation_index, civil_status, smoking_sidiap, bmi, elixhauser_cat	13089	0.301655
7	sex, birth_range, deprivation_index, civil_status, smoking_sidiap, pc_visits, elixhauser_cat	13129	0.269166
7	sex, birth_range, deprivation_index, civil_status, smoking_esca, household_size, health_status	13097	0.285679
7	sex, birth_range, deprivation_index, civil_status, smoking_esca, household_size, bmi	13071	0.303332
7	sex, birth_range, deprivation_index, civil_status, smoking_esca, household_size, pc_visits	13111	0.278994
7	sex, birth_range, deprivation_index, civil_status, smoking_esca, household_size, elixhauser_cat	13111	0.285121
7	sex, birth_range, deprivation_index, civil_status, smoking_esca, health_status, bmi	13074	0.302493
7	sex, birth_range, deprivation_index, civil_status, smoking_esca, health_status, pc_visits	13114	0.25745
7	sex, birth_range, deprivation_index, civil_status, smoking_esca, health_status, elixhauser_cat	13114	0.284448
7	sex, birth_range, deprivation_index, civil_status, smoking_esca, bmi, pc_visits	13089	0.313397
7	sex, birth_range, deprivation_index, civil_status, smoking_esca, bmi, elixhauser_cat	13089	0.301255
7	sex, birth_range, deprivation_index, civil_status, smoking_esca, pc_visits, elixhauser_cat	13129	0.269669
7	sex, birth_range, deprivation_index, civil_status, household_size, health_status, bmi	13108	0.309083
7	sex, birth_range, deprivation_index, civil_status, household_size, health_status, pc_visits	13148	0.267739
7	sex, birth_range, deprivation_index, civil_status, household_size, health_status, elixhauser_cat	13148	0.291361
7	sex, birth_range, deprivation_index, civil_status, household_size, bmi, pc_visits	13123	0.326386
7	sex, birth_range, deprivation_index, civil_status, household_size, bmi, elixhauser_cat	13123	0.308758
7	sex, birth_range, deprivation_index, civil_status, household_size, pc_visits, elixhauser_cat	13163	0.281049
7	sex, birth_range, deprivation_index, civil_status, health_status, bmi, pc_visits	13125	0.297496
7	sex, birth_range, deprivation_index, civil_status, health_status, bmi, elixhauser_cat	13125	0.313025
7	sex, birth_range, deprivation_index, civil_status, health_status, pc_visits, elixhauser_cat	13165	0.266859
7	sex, birth_range, deprivation_index, civil_status, bmi, pc_visits, elixhauser_cat	13141	0.293676
7	sex, birth_range, deprivation_index, employment, smoking_sidiap, household_size, health_status	13061	0.284511
7	sex, birth_range, deprivation_index, employment, smoking_sidiap, household_size, bmi	13033	0.30182
7	sex, birth_range, deprivation_index, employment, smoking_sidiap, household_size, pc_visits	13073	0.273493
7	sex, birth_range, deprivation_index, employment, smoking_sidiap, household_size, elixhauser_cat	13073	0.283751
7	sex, birth_range, deprivation_index, employment, smoking_sidiap, health_status, bmi	13039	0.301351
7	sex, birth_range, deprivation_index, employment, smoking_sidiap, health_status, pc_visits	13079	0.256096
7	sex, birth_range, deprivation_index, employment, smoking_sidiap, health_status, elixhauser_cat	13079	0.282416
7	sex, birth_range, deprivation_index, employment, smoking_sidiap, bmi, pc_visits	13052	0.310205
7	sex, birth_range, deprivation_index, employment, smoking_sidiap, bmi, elixhauser_cat	13052	0.300504
7	sex, birth_range, deprivation_index, employment, smoking_sidiap, pc_visits, elixhauser_cat	13092	0.26539
7	sex, birth_range, deprivation_index, employment, smoking_esca, household_size, health_status	13061	0.28485
7	sex, birth_range, deprivation_index, employment, smoking_esca, household_size, bmi	13033	0.302716
7	sex, birth_range, deprivation_index, employment, smoking_esca, household_size, pc_visits	13073	0.275014
7	sex, birth_range, deprivation_index, employment, smoking_esca, household_size, elixhauser_cat	13073	0.284254
7	sex, birth_range, deprivation_index, employment, smoking_esca, health_status, bmi	13039	0.3019
7	sex, birth_range, deprivation_index, employment, smoking_esca, health_status, pc_visits	13079	0.255835
7	sex, birth_range, deprivation_index, employment, smoking_esca, health_status, elixhauser_cat	13079	0.282817
7	sex, birth_range, deprivation_index, employment, smoking_esca, bmi, pc_visits	13052	0.310241
7	sex, birth_range, deprivation_index, employment, smoking_esca, bmi, elixhauser_cat	13052	0.299684
7	sex, birth_range, deprivation_index, employment, smoking_esca, pc_visits, elixhauser_cat	13092	0.265514
7	sex, birth_range, deprivation_index, employment, household_size, health_status, bmi	13069	0.31026
7	sex, birth_range, deprivation_index, employment, household_size, health_status, pc_visits	13109	0.267009
7	sex, birth_range, deprivation_index, employment, household_size, health_status, elixhauser_cat	13109	0.29308
7	sex, birth_range, deprivation_index, employment, household_size, bmi, pc_visits	13082	0.322951
7	sex, birth_range, deprivation_index, employment, household_size, bmi, elixhauser_cat	13082	0.310906
7	sex, birth_range, deprivation_index, employment, household_size, pc_visits, elixhauser_cat	13122	0.278538
7	sex, birth_range, deprivation_index, employment, health_status, bmi, pc_visits	13087	0.295291
7	sex, birth_range, deprivation_index, employment, health_status, bmi, elixhauser_cat	13087	0.312317
7	sex, birth_range, deprivation_index, employment, health_status, pc_visits, elixhauser_cat	13127	0.267393
7	sex, birth_range, deprivation_index, employment, bmi, pc_visits, elixhauser_cat	13101	0.292885
7	sex, birth_range, deprivation_index, occupation_status, smoking_sidiap, household_size, health_status	13061	0.278528
7	sex, birth_range, deprivation_index, occupation_status, smoking_sidiap, household_size, bmi	13033	0.294941
7	sex, birth_range, deprivation_index, occupation_status, smoking_sidiap, household_size, pc_visits	13073	0.253761
7	sex, birth_range, deprivation_index, occupation_status, smoking_sidiap, household_size, elixhauser_cat	13073	0.279257
7	sex, birth_range, deprivation_index, occupation_status, smoking_sidiap, health_status, bmi	13039	0.295245
7	sex, birth_range, deprivation_index, occupation_status, smoking_sidiap, health_status, pc_visits	13079	0.246746
7	sex, birth_range, deprivation_index, occupation_status, smoking_sidiap, health_status, elixhauser_cat	13079	0.275864
7	sex, birth_range, deprivation_index, occupation_status, smoking_sidiap, bmi, pc_visits	13052	0.291362
7	sex, birth_range, deprivation_index, occupation_status, smoking_sidiap, bmi, elixhauser_cat	13052	0.300137
7	sex, birth_range, deprivation_index, occupation_status, smoking_sidiap, pc_visits, elixhauser_cat	13092	0.255607
7	sex, birth_range, deprivation_index, occupation_status, smoking_esca, household_size, health_status	13061	0.279484
7	sex, birth_range, deprivation_index, occupation_status, smoking_esca, household_size, bmi	13033	0.29566
7	sex, birth_range, deprivation_index, occupation_status, smoking_esca, household_size, pc_visits	13073	0.25554
7	sex, birth_range, deprivation_index, occupation_status, smoking_esca, household_size, elixhauser_cat	13073	0.279944
7	sex, birth_range, deprivation_index, occupation_status, smoking_esca, health_status, bmi	13039	0.295446
7	sex, birth_range, deprivation_index, occupation_status, smoking_esca, health_status, pc_visits	13079	0.247994
7	sex, birth_range, deprivation_index, occupation_status, smoking_esca, health_status, elixhauser_cat	13079	0.27719
7	sex, birth_range, deprivation_index, occupation_status, smoking_esca, bmi, pc_visits	13052	0.291453
7	sex, birth_range, deprivation_index, occupation_status, smoking_esca, bmi, elixhauser_cat	13052	0.300255
7	sex, birth_range, deprivation_index, occupation_status, smoking_esca, pc_visits, elixhauser_cat	13092	0.255969
7	sex, birth_range, deprivation_index, occupation_status, household_size, health_status, bmi	13069	0.300546
7	sex, birth_range, deprivation_index, occupation_status, household_size, health_status, pc_visits	13109	0.253189
7	sex, birth_range, deprivation_index, occupation_status, household_size, health_status, elixhauser_cat	13109	0.281198
7	sex, birth_range, deprivation_index, occupation_status, household_size, bmi, pc_visits	13082	0.299462
7	sex, birth_range, deprivation_index, occupation_status, household_size, bmi, elixhauser_cat	13082	0.30461
7	sex, birth_range, deprivation_index, occupation_status, household_size, pc_visits, elixhauser_cat	13122	0.266525
7	sex, birth_range, deprivation_index, occupation_status, health_status, bmi, pc_visits	13087	0.279265
7	sex, birth_range, deprivation_index, occupation_status, health_status, bmi, elixhauser_cat	13087	0.304601
7	sex, birth_range, deprivation_index, occupation_status, health_status, pc_visits, elixhauser_cat	13127	0.253832
7	sex, birth_range, deprivation_index, occupation_status, bmi, pc_visits, elixhauser_cat	13101	0.281633
7	sex, birth_range, deprivation_index, smoking_sidiap, household_size, health_status, bmi	13076	0.30149
7	sex, birth_range, deprivation_index, smoking_sidiap, household_size, health_status, pc_visits	13116	0.257384
7	sex, birth_range, deprivation_index, smoking_sidiap, household_size, health_status, elixhauser_cat	13116	0.283947
7	sex, birth_range, deprivation_index, smoking_sidiap, household_size, bmi, pc_visits	13090	0.316549
7	sex, birth_range, deprivation_index, smoking_sidiap, household_size, bmi, elixhauser_cat	13090	0.300387
7	sex, birth_range, deprivation_index, smoking_sidiap, household_size, pc_visits, elixhauser_cat	13130	0.267651
7	sex, birth_range, deprivation_index, smoking_sidiap, health_status, bmi, pc_visits	13095	0.290247
7	sex, birth_range, deprivation_index, smoking_sidiap, health_status, bmi, elixhauser_cat	13095	0.304074
7	sex, birth_range, deprivation_index, smoking_sidiap, health_status, pc_visits, elixhauser_cat	13135	0.260392
7	sex, birth_range, deprivation_index, smoking_sidiap, bmi, pc_visits, elixhauser_cat	13110	0.280918
7	sex, birth_range, deprivation_index, smoking_esca, household_size, health_status, bmi	13076	0.303567
7	sex, birth_range, deprivation_index, smoking_esca, household_size, health_status, pc_visits	13116	0.25674
7	sex, birth_range, deprivation_index, smoking_esca, household_size, health_status, elixhauser_cat	13116	0.284992
7	sex, birth_range, deprivation_index, smoking_esca, household_size, bmi, pc_visits	13090	0.316835
7	sex, birth_range, deprivation_index, smoking_esca, household_size, bmi, elixhauser_cat	13090	0.299891
7	sex, birth_range, deprivation_index, smoking_esca, household_size, pc_visits, elixhauser_cat	13130	0.267693
7	sex, birth_range, deprivation_index, smoking_esca, health_status, bmi, pc_visits	13095	0.291741
7	sex, birth_range, deprivation_index, smoking_esca, health_status, bmi, elixhauser_cat	13095	0.303779
7	sex, birth_range, deprivation_index, smoking_esca, health_status, pc_visits, elixhauser_cat	13135	0.261649
7	sex, birth_range, deprivation_index, smoking_esca, bmi, pc_visits, elixhauser_cat	13110	0.280774
7	sex, birth_range, deprivation_index, household_size, health_status, bmi, pc_visits	13127	0.298112
7	sex, birth_range, deprivation_index, household_size, health_status, bmi, elixhauser_cat	13127	0.312579
7	sex, birth_range, deprivation_index, household_size, health_status, pc_visits, elixhauser_cat	13167	0.268863
7	sex, birth_range, deprivation_index, household_size, bmi, pc_visits, elixhauser_cat	13142	0.293633
7	sex, birth_range, deprivation_index, health_status, bmi, pc_visits, elixhauser_cat	13146	0.287015
7	sex, birth_range, rurality, education_idescat, civil_status, employment, smoking_sidiap	13046	0.264894
7	sex, birth_range, rurality, education_idescat, civil_status, employment, smoking_esca	13046	0.263194
7	sex, birth_range, rurality, education_idescat, civil_status, employment, household_size	13077	0.282665
7	sex, birth_range, rurality, education_idescat, civil_status, employment, health_status	13079	0.275544
7	sex, birth_range, rurality, education_idescat, civil_status, employment, bmi	13053	0.305438
7	sex, birth_range, rurality, education_idescat, civil_status, employment, pc_visits	13093	0.282379
7	sex, birth_range, rurality, education_idescat, civil_status, employment, elixhauser_cat	13093	0.289273
7	sex, birth_range, rurality, education_idescat, civil_status, occupation_status, smoking_sidiap	13046	0.273589
7	sex, birth_range, rurality, education_idescat, civil_status, occupation_status, smoking_esca	13046	0.272122
7	sex, birth_range, rurality, education_idescat, civil_status, occupation_status, household_size	13077	0.283338
7	sex, birth_range, rurality, education_idescat, civil_status, occupation_status, health_status	13079	0.270441
7	sex, birth_range, rurality, education_idescat, civil_status, occupation_status, bmi	13053	0.303638
7	sex, birth_range, rurality, education_idescat, civil_status, occupation_status, pc_visits	13093	0.27057
7	sex, birth_range, rurality, education_idescat, civil_status, occupation_status, elixhauser_cat	13093	0.290198
7	sex, birth_range, rurality, education_idescat, civil_status, smoking_sidiap, household_size	13084	0.266249
7	sex, birth_range, rurality, education_idescat, civil_status, smoking_sidiap, health_status	13086	0.260516
7	sex, birth_range, rurality, education_idescat, civil_status, smoking_sidiap, bmi	13061	0.294695
7	sex, birth_range, rurality, education_idescat, civil_status, smoking_sidiap, pc_visits	13101	0.270216
7	sex, birth_range, rurality, education_idescat, civil_status, smoking_sidiap, elixhauser_cat	13101	0.272431
7	sex, birth_range, rurality, education_idescat, civil_status, smoking_esca, household_size	13084	0.264971
7	sex, birth_range, rurality, education_idescat, civil_status, smoking_esca, health_status	13086	0.258807
7	sex, birth_range, rurality, education_idescat, civil_status, smoking_esca, bmi	13061	0.294296
7	sex, birth_range, rurality, education_idescat, civil_status, smoking_esca, pc_visits	13101	0.27011
7	sex, birth_range, rurality, education_idescat, civil_status, smoking_esca, elixhauser_cat	13101	0.271358
7	sex, birth_range, rurality, education_idescat, civil_status, household_size, health_status	13119	0.277437
7	sex, birth_range, rurality, education_idescat, civil_status, household_size, bmi	13094	0.308532
7	sex, birth_range, rurality, education_idescat, civil_status, household_size, pc_visits	13134	0.287196
7	sex, birth_range, rurality, education_idescat, civil_status, household_size, elixhauser_cat	13134	0.288746
7	sex, birth_range, rurality, education_idescat, civil_status, health_status, bmi	13095	0.29801
7	sex, birth_range, rurality, education_idescat, civil_status, health_status, pc_visits	13135	0.251625
7	sex, birth_range, rurality, education_idescat, civil_status, health_status, elixhauser_cat	13135	0.275725
7	sex, birth_range, rurality, education_idescat, civil_status, bmi, pc_visits	13111	0.320754
7	sex, birth_range, rurality, education_idescat, civil_status, bmi, elixhauser_cat	13111	0.302651
7	sex, birth_range, rurality, education_idescat, civil_status, pc_visits, elixhauser_cat	13151	0.268222
7	sex, birth_range, rurality, education_idescat, employment, smoking_sidiap, household_size	13046	0.26765
7	sex, birth_range, rurality, education_idescat, employment, smoking_sidiap, health_status	13051	0.259544
7	sex, birth_range, rurality, education_idescat, employment, smoking_sidiap, bmi	13024	0.298433
7	sex, birth_range, rurality, education_idescat, employment, smoking_sidiap, pc_visits	13064	0.272708
7	sex, birth_range, rurality, education_idescat, employment, smoking_sidiap, elixhauser_cat	13064	0.276251
7	sex, birth_range, rurality, education_idescat, employment, smoking_esca, household_size	13046	0.265997
7	sex, birth_range, rurality, education_idescat, employment, smoking_esca, health_status	13051	0.257081
7	sex, birth_range, rurality, education_idescat, employment, smoking_esca, bmi	13024	0.296681
7	sex, birth_range, rurality, education_idescat, employment, smoking_esca, pc_visits	13064	0.272303
7	sex, birth_range, rurality, education_idescat, employment, smoking_esca, elixhauser_cat	13064	0.274435
7	sex, birth_range, rurality, education_idescat, employment, household_size, health_status	13080	0.277501
7	sex, birth_range, rurality, education_idescat, employment, household_size, bmi	13053	0.311015
7	sex, birth_range, rurality, education_idescat, employment, household_size, pc_visits	13093	0.288291
7	sex, birth_range, rurality, education_idescat, employment, household_size, elixhauser_cat	13093	0.294966
7	sex, birth_range, rurality, education_idescat, employment, health_status, bmi	13057	0.299389
7	sex, birth_range, rurality, education_idescat, employment, health_status, pc_visits	13097	0.252044
7	sex, birth_range, rurality, education_idescat, employment, health_status, elixhauser_cat	13097	0.277571
7	sex, birth_range, rurality, education_idescat, employment, bmi, pc_visits	13071	0.320925
7	sex, birth_range, rurality, education_idescat, employment, bmi, elixhauser_cat	13071	0.310682
7	sex, birth_range, rurality, education_idescat, employment, pc_visits, elixhauser_cat	13111	0.272301
7	sex, birth_range, rurality, education_idescat, occupation_status, smoking_sidiap, household_size	13046	0.274795
7	sex, birth_range, rurality, education_idescat, occupation_status, smoking_sidiap, health_status	13051	0.259249
7	sex, birth_range, rurality, education_idescat, occupation_status, smoking_sidiap, bmi	13024	0.296139
7	sex, birth_range, rurality, education_idescat, occupation_status, smoking_sidiap, pc_visits	13064	0.263678
7	sex, birth_range, rurality, education_idescat, occupation_status, smoking_sidiap, elixhauser_cat	13064	0.282486
7	sex, birth_range, rurality, education_idescat, occupation_status, smoking_esca, household_size	13046	0.273234
7	sex, birth_range, rurality, education_idescat, occupation_status, smoking_esca, health_status	13051	0.259004
7	sex, birth_range, rurality, education_idescat, occupation_status, smoking_esca, bmi	13024	0.29363
7	sex, birth_range, rurality, education_idescat, occupation_status, smoking_esca, pc_visits	13064	0.26253
7	sex, birth_range, rurality, education_idescat, occupation_status, smoking_esca, elixhauser_cat	13064	0.28071
7	sex, birth_range, rurality, education_idescat, occupation_status, household_size, health_status	13080	0.275576
7	sex, birth_range, rurality, education_idescat, occupation_status, household_size, bmi	13053	0.307436
7	sex, birth_range, rurality, education_idescat, occupation_status, household_size, pc_visits	13093	0.275165
7	sex, birth_range, rurality, education_idescat, occupation_status, household_size, elixhauser_cat	13093	0.295049
7	sex, birth_range, rurality, education_idescat, occupation_status, health_status, bmi	13057	0.294613
7	sex, birth_range, rurality, education_idescat, occupation_status, health_status, pc_visits	13097	0.245365
7	sex, birth_range, rurality, education_idescat, occupation_status, health_status, elixhauser_cat	13097	0.278049
7	sex, birth_range, rurality, education_idescat, occupation_status, bmi, pc_visits	13071	0.312506
7	sex, birth_range, rurality, education_idescat, occupation_status, bmi, elixhauser_cat	13071	0.315855
7	sex, birth_range, rurality, education_idescat, occupation_status, pc_visits, elixhauser_cat	13111	0.268326
7	sex, birth_range, rurality, education_idescat, smoking_sidiap, household_size, health_status	13088	0.259789
7	sex, birth_range, rurality, education_idescat, smoking_sidiap, household_size, bmi	13062	0.298538
7	sex, birth_range, rurality, education_idescat, smoking_sidiap, household_size, pc_visits	13102	0.274586
7	sex, birth_range, rurality, education_idescat, smoking_sidiap, household_size, elixhauser_cat	13102	0.275008
7	sex, birth_range, rurality, education_idescat, smoking_sidiap, health_status, bmi	13066	0.286881
7	sex, birth_range, rurality, education_idescat, smoking_sidiap, health_status, pc_visits	13106	0.235509
7	sex, birth_range, rurality, education_idescat, smoking_sidiap, health_status, elixhauser_cat	13106	0.262937
7	sex, birth_range, rurality, education_idescat, smoking_sidiap, bmi, pc_visits	13081	0.310595
7	sex, birth_range, rurality, education_idescat, smoking_sidiap, bmi, elixhauser_cat	13081	0.292932
7	sex, birth_range, rurality, education_idescat, smoking_sidiap, pc_visits, elixhauser_cat	13121	0.250268
7	sex, birth_range, rurality, education_idescat, smoking_esca, household_size, health_status	13088	0.25729
7	sex, birth_range, rurality, education_idescat, smoking_esca, household_size, bmi	13062	0.296789
7	sex, birth_range, rurality, education_idescat, smoking_esca, household_size, pc_visits	13102	0.274117
7	sex, birth_range, rurality, education_idescat, smoking_esca, household_size, elixhauser_cat	13102	0.273161
7	sex, birth_range, rurality, education_idescat, smoking_esca, health_status, bmi	13066	0.284535
7	sex, birth_range, rurality, education_idescat, smoking_esca, health_status, pc_visits	13106	0.234289
7	sex, birth_range, rurality, education_idescat, smoking_esca, health_status, elixhauser_cat	13106	0.262898
7	sex, birth_range, rurality, education_idescat, smoking_esca, bmi, pc_visits	13081	0.309461
7	sex, birth_range, rurality, education_idescat, smoking_esca, bmi, elixhauser_cat	13081	0.290337
7	sex, birth_range, rurality, education_idescat, smoking_esca, pc_visits, elixhauser_cat	13121	0.248851
7	sex, birth_range, rurality, education_idescat, household_size, health_status, bmi	13097	0.299338
7	sex, birth_range, rurality, education_idescat, household_size, health_status, pc_visits	13137	0.252658
7	sex, birth_range, rurality, education_idescat, household_size, health_status, elixhauser_cat	13137	0.279867
7	sex, birth_range, rurality, education_idescat, household_size, bmi, pc_visits	13112	0.324309
7	sex, birth_range, rurality, education_idescat, household_size, bmi, elixhauser_cat	13112	0.307287
7	sex, birth_range, rurality, education_idescat, household_size, pc_visits, elixhauser_cat	13152	0.271556
7	sex, birth_range, rurality, education_idescat, health_status, bmi, pc_visits	13115	0.287589
7	sex, birth_range, rurality, education_idescat, health_status, bmi, elixhauser_cat	13115	0.299658
7	sex, birth_range, rurality, education_idescat, health_status, pc_visits, elixhauser_cat	13155	0.249544
7	sex, birth_range, rurality, education_idescat, bmi, pc_visits, elixhauser_cat	13131	0.282799
7	sex, birth_range, rurality, education_esca, civil_status, employment, smoking_sidiap	13046	0.261434
7	sex, birth_range, rurality, education_esca, civil_status, employment, smoking_esca	13046	0.26039
7	sex, birth_range, rurality, education_esca, civil_status, employment, household_size	13077	0.271572
7	sex, birth_range, rurality, education_esca, civil_status, employment, health_status	13079	0.269738
7	sex, birth_range, rurality, education_esca, civil_status, employment, bmi	13053	0.29287
7	sex, birth_range, rurality, education_esca, civil_status, employment, pc_visits	13093	0.26981
7	sex, birth_range, rurality, education_esca, civil_status, employment, elixhauser_cat	13093	0.274574
7	sex, birth_range, rurality, education_esca, civil_status, occupation_status, smoking_sidiap	13046	0.259081
7	sex, birth_range, rurality, education_esca, civil_status, occupation_status, smoking_esca	13046	0.259516
7	sex, birth_range, rurality, education_esca, civil_status, occupation_status, household_size	13077	0.263519
7	sex, birth_range, rurality, education_esca, civil_status, occupation_status, health_status	13079	0.265059
7	sex, birth_range, rurality, education_esca, civil_status, occupation_status, bmi	13053	0.284309
7	sex, birth_range, rurality, education_esca, civil_status, occupation_status, pc_visits	13093	0.249195
7	sex, birth_range, rurality, education_esca, civil_status, occupation_status, elixhauser_cat	13093	0.267887
7	sex, birth_range, rurality, education_esca, civil_status, smoking_sidiap, household_size	13084	0.260366
7	sex, birth_range, rurality, education_esca, civil_status, smoking_sidiap, health_status	13086	0.258045
7	sex, birth_range, rurality, education_esca, civil_status, smoking_sidiap, bmi	13061	0.282199
7	sex, birth_range, rurality, education_esca, civil_status, smoking_sidiap, pc_visits	13101	0.25924
7	sex, birth_range, rurality, education_esca, civil_status, smoking_sidiap, elixhauser_cat	13101	0.264705
7	sex, birth_range, rurality, education_esca, civil_status, smoking_esca, household_size	13084	0.259396
7	sex, birth_range, rurality, education_esca, civil_status, smoking_esca, health_status	13086	0.257671
7	sex, birth_range, rurality, education_esca, civil_status, smoking_esca, bmi	13061	0.281701
7	sex, birth_range, rurality, education_esca, civil_status, smoking_esca, pc_visits	13101	0.260125
7	sex, birth_range, rurality, education_esca, civil_status, smoking_esca, elixhauser_cat	13101	0.264652
7	sex, birth_range, rurality, education_esca, civil_status, household_size, health_status	13119	0.271433
7	sex, birth_range, rurality, education_esca, civil_status, household_size, bmi	13094	0.292892
7	sex, birth_range, rurality, education_esca, civil_status, household_size, pc_visits	13134	0.275312
7	sex, birth_range, rurality, education_esca, civil_status, household_size, elixhauser_cat	13134	0.27428
7	sex, birth_range, rurality, education_esca, civil_status, health_status, bmi	13095	0.289675
7	sex, birth_range, rurality, education_esca, civil_status, health_status, pc_visits	13135	0.247827
7	sex, birth_range, rurality, education_esca, civil_status, health_status, elixhauser_cat	13135	0.270624
7	sex, birth_range, rurality, education_esca, civil_status, bmi, pc_visits	13111	0.30966
7	sex, birth_range, rurality, education_esca, civil_status, bmi, elixhauser_cat	13111	0.290931
7	sex, birth_range, rurality, education_esca, civil_status, pc_visits, elixhauser_cat	13151	0.259402
7	sex, birth_range, rurality, education_esca, employment, smoking_sidiap, household_size	13046	0.261962
7	sex, birth_range, rurality, education_esca, employment, smoking_sidiap, health_status	13051	0.257295
7	sex, birth_range, rurality, education_esca, employment, smoking_sidiap, bmi	13024	0.283886
7	sex, birth_range, rurality, education_esca, employment, smoking_sidiap, pc_visits	13064	0.260709
7	sex, birth_range, rurality, education_esca, employment, smoking_sidiap, elixhauser_cat	13064	0.266573
7	sex, birth_range, rurality, education_esca, employment, smoking_esca, household_size	13046	0.260414
7	sex, birth_range, rurality, education_esca, employment, smoking_esca, health_status	13051	0.256251
7	sex, birth_range, rurality, education_esca, employment, smoking_esca, bmi	13024	0.282354
7	sex, birth_range, rurality, education_esca, employment, smoking_esca, pc_visits	13064	0.261494
7	sex, birth_range, rurality, education_esca, employment, smoking_esca, elixhauser_cat	13064	0.265868
7	sex, birth_range, rurality, education_esca, employment, household_size, health_status	13080	0.272575
7	sex, birth_range, rurality, education_esca, employment, household_size, bmi	13053	0.296477
7	sex, birth_range, rurality, education_esca, employment, household_size, pc_visits	13093	0.274051
7	sex, birth_range, rurality, education_esca, employment, household_size, elixhauser_cat	13093	0.278513
7	sex, birth_range, rurality, education_esca, employment, health_status, bmi	13057	0.291138
7	sex, birth_range, rurality, education_esca, employment, health_status, pc_visits	13097	0.248529
7	sex, birth_range, rurality, education_esca, employment, health_status, elixhauser_cat	13097	0.272561
7	sex, birth_range, rurality, education_esca, employment, bmi, pc_visits	13071	0.309187
7	sex, birth_range, rurality, education_esca, employment, bmi, elixhauser_cat	13071	0.2947
7	sex, birth_range, rurality, education_esca, employment, pc_visits, elixhauser_cat	13111	0.261427
7	sex, birth_range, rurality, education_esca, occupation_status, smoking_sidiap, household_size	13046	0.259552
7	sex, birth_range, rurality, education_esca, occupation_status, smoking_sidiap, health_status	13051	0.253348
7	sex, birth_range, rurality, education_esca, occupation_status, smoking_sidiap, bmi	13024	0.28368
7	sex, birth_range, rurality, education_esca, occupation_status, smoking_sidiap, pc_visits	13064	0.241503
7	sex, birth_range, rurality, education_esca, occupation_status, smoking_sidiap, elixhauser_cat	13064	0.263851
7	sex, birth_range, rurality, education_esca, occupation_status, smoking_esca, household_size	13046	0.259509
7	sex, birth_range, rurality, education_esca, occupation_status, smoking_esca, health_status	13051	0.251671
7	sex, birth_range, rurality, education_esca, occupation_status, smoking_esca, bmi	13024	0.283364
7	sex, birth_range, rurality, education_esca, occupation_status, smoking_esca, pc_visits	13064	0.241218
7	sex, birth_range, rurality, education_esca, occupation_status, smoking_esca, elixhauser_cat	13064	0.264317
7	sex, birth_range, rurality, education_esca, occupation_status, household_size, health_status	13080	0.268116
7	sex, birth_range, rurality, education_esca, occupation_status, household_size, bmi	13053	0.286307
7	sex, birth_range, rurality, education_esca, occupation_status, household_size, pc_visits	13093	0.250548
7	sex, birth_range, rurality, education_esca, occupation_status, household_size, elixhauser_cat	13093	0.270562
7	sex, birth_range, rurality, education_esca, occupation_status, health_status, bmi	13057	0.283212
7	sex, birth_range, rurality, education_esca, occupation_status, health_status, pc_visits	13097	0.235319
7	sex, birth_range, rurality, education_esca, occupation_status, health_status, elixhauser_cat	13097	0.268574
7	sex, birth_range, rurality, education_esca, occupation_status, bmi, pc_visits	13071	0.286976
7	sex, birth_range, rurality, education_esca, occupation_status, bmi, elixhauser_cat	13071	0.291498
7	sex, birth_range, rurality, education_esca, occupation_status, pc_visits, elixhauser_cat	13111	0.246347
7	sex, birth_range, rurality, education_esca, smoking_sidiap, household_size, health_status	13088	0.258094
7	sex, birth_range, rurality, education_esca, smoking_sidiap, household_size, bmi	13062	0.28522
7	sex, birth_range, rurality, education_esca, smoking_sidiap, household_size, pc_visits	13102	0.26391
7	sex, birth_range, rurality, education_esca, smoking_sidiap, household_size, elixhauser_cat	13102	0.266004
7	sex, birth_range, rurality, education_esca, smoking_sidiap, health_status, bmi	13066	0.281296
7	sex, birth_range, rurality, education_esca, smoking_sidiap, health_status, pc_visits	13106	0.232119
7	sex, birth_range, rurality, education_esca, smoking_sidiap, health_status, elixhauser_cat	13106	0.258566
7	sex, birth_range, rurality, education_esca, smoking_sidiap, bmi, pc_visits	13081	0.301135
7	sex, birth_range, rurality, education_esca, smoking_sidiap, bmi, elixhauser_cat	13081	0.281354
7	sex, birth_range, rurality, education_esca, smoking_sidiap, pc_visits, elixhauser_cat	13121	0.244813
7	sex, birth_range, rurality, education_esca, smoking_esca, household_size, health_status	13088	0.256525
7	sex, birth_range, rurality, education_esca, smoking_esca, household_size, bmi	13062	0.283981
7	sex, birth_range, rurality, education_esca, smoking_esca, household_size, pc_visits	13102	0.264763
7	sex, birth_range, rurality, education_esca, smoking_esca, household_size, elixhauser_cat	13102	0.26521
7	sex, birth_range, rurality, education_esca, smoking_esca, health_status, bmi	13066	0.280003
7	sex, birth_range, rurality, education_esca, smoking_esca, health_status, pc_visits	13106	0.231101
7	sex, birth_range, rurality, education_esca, smoking_esca, health_status, elixhauser_cat	13106	0.256344
7	sex, birth_range, rurality, education_esca, smoking_esca, bmi, pc_visits	13081	0.30045
7	sex, birth_range, rurality, education_esca, smoking_esca, bmi, elixhauser_cat	13081	0.279407
7	sex, birth_range, rurality, education_esca, smoking_esca, pc_visits, elixhauser_cat	13121	0.243116
7	sex, birth_range, rurality, education_esca, household_size, health_status, bmi	13097	0.291432
7	sex, birth_range, rurality, education_esca, household_size, health_status, pc_visits	13137	0.248441
7	sex, birth_range, rurality, education_esca, household_size, health_status, elixhauser_cat	13137	0.274814
7	sex, birth_range, rurality, education_esca, household_size, bmi, pc_visits	13112	0.313529
7	sex, birth_range, rurality, education_esca, household_size, bmi, elixhauser_cat	13112	0.294947
7	sex, birth_range, rurality, education_esca, household_size, pc_visits, elixhauser_cat	13152	0.262197
7	sex, birth_range, rurality, education_esca, health_status, bmi, pc_visits	13115	0.27957
7	sex, birth_range, rurality, education_esca, health_status, bmi, elixhauser_cat	13115	0.292877
7	sex, birth_range, rurality, education_esca, health_status, pc_visits, elixhauser_cat	13155	0.242337
7	sex, birth_range, rurality, education_esca, bmi, pc_visits, elixhauser_cat	13131	0.269719
7	sex, birth_range, rurality, civil_status, employment, smoking_sidiap, household_size	13056	0.262091
[truncated: 4,913 more rows]

## Sheet: Table S3
Table S3. Table of the comparison results in sociodemographic variables between GCAT cohort and general population of Catalonia.
Variable	Value	Sex	Age	GCAT	General Population	Source	OR	CI 95% lower	CI 95% upper	p-value
Sex	Female	Female	All	7868	810108	SIDIAP	1.42205	1.37368	1.4722	1.93481e-90
Sex	Male	Male	All	5566	814967	SIDIAP	0.703208	0.679258	0.72797	1.93481e-90
Age	Mean (SD)	All	All	57.18 (5.4)	57.61 (5.72)	SIDIAP				4.15927e-20
Age	Mean (SD)	Female	All	57.11 (5.35)	57.77 (5.72)	SIDIAP				1.82066e-27
Age	Mean (SD)	Male	All	57.29 (5.48)	57.46 (5.7)	SIDIAP				0.0201718
Age	Birth year	All	1951_1955	2183	326585	SIDIAP	0.771448	0.736436	0.807833	6.72955e-30
Age	Birth year	Female	1951_1955	1212	169008	SIDIAP	0.690736	0.649013	0.73463	1.20174e-34
Age	Birth year	Male	1951_1955	971	157577	SIDIAP	0.881585	0.8216	0.945171	0.000346537
Age	Birth year	All	1956_1960	3053	378748	SIDIAP	0.96775	0.92901	1.0079	0.114575
Age	Birth year	Female	1956_1960	1814	192327	SIDIAP	0.962455	0.91255	1.01475	0.158176
Age	Birth year	Male	1956_1960	1239	186421	SIDIAP	0.965429	0.905437	1.02885	0.283372
Age	Birth year	All	1961_1965	4106	430404	SIDIAP	1.22184	1.17729	1.26784	7.93852e-26
Age	Birth year	Female	1961_1965	2441	212997	SIDIAP	1.26095	1.20132	1.32323	1.16123e-20
Age	Birth year	Male	1961_1965	1665	217407	SIDIAP	1.1731	1.10682	1.243	7.92963e-08
Age	Birth year	All	1966_1970	4092	489338	SIDIAP	1.01663	0.979577	1.05495	0.379891
Age	Birth year	Female	1966_1970	2401	235776	SIDIAP	1.06981	1.01903	1.1229	0.00632185
Age	Birth year	Male	1966_1970	1691	253562	SIDIAP	0.96622	0.91183	1.02346	0.245188
Deprivation index	Quintile 1 (%)	All	All	47.32	14.14	SIDIAP	5.45464	5.26868	5.6471	0
Deprivation index	Quintile 2 (%)	All	All	27.64	31.11	SIDIAP	0.845855	0.813827	0.878971	4.87607e-18
Deprivation index	Quintile 3 (%)	All	All	13.71	31.76	SIDIAP	0.341442	0.324709	0.358877	0
Deprivation index	Quintile 4 (%)	All	All	8.95	18.5	SIDIAP	0.433271	0.407742	0.460082	3.58153e-206
Deprivation index	Quintile 5 (%)	All	All	2.38	4.5	SIDIAP	0.517339	0.460947	0.578868	2.05633e-37
Rurality	Urban (%)	All	All	98.63	93.32	SIDIAP	5.14587	4.44311	5.99204	6.9248e-189
Rurality	Rural (%)	All	All	1.37	6.68	SIDIAP	0.194331	0.166888	0.225068	6.9248e-189
Education	Primary or less (%)	All	All	13.24	8.84	IDESCAT	1.5737	1.49579	1.65491	4.63788e-63
Education	Secondary 1 (%)	All	All	10.99	34.79	IDESCAT	0.231418	0.219064	0.244321	0
Education	Secondary 2 (%)	All	All	27.37	25.33	IDESCAT	1.11045	1.06865	1.15366	9.2378e-08
Education	Higher (%)	All	All	48.4	31.03	IDESCAT	2.08487	2.01487	2.15728	0
Education	Primary or less (%)	Male	All	10.27	8.84	IDESCAT	1.34124	1.22748	1.46332	1.80019e-10
Education	Secondary 1 (%)	Male	All	10.47	34.79	IDESCAT	0.220849	0.202312	0.240699	0
Education	Secondary 2 (%)	Male	All	27.2	25.33	IDESCAT	1.06613	1.00415	1.1315	0.0355527
Education	Higher (%)	Male	All	52.06	31.03	IDESCAT	2.35439	2.2325	2.48294	7.28891e-218
Education	Primary or less (%)	Female	All	15.35	8.84	IDESCAT	1.67377	1.57227	1.78068	1.17103e-53
Education	Secondary 1 (%)	Female	All	11.36	34.79	IDESCAT	0.238453	0.222109	0.255731	0
Education	Secondary 2 (%)	Female	All	27.49	25.33	IDESCAT	1.15248	1.09603	1.21155	3.20815e-08
Education	Higher (%)	Female	All	45.81	31.03	IDESCAT	1.92423	1.83966	2.01235	1.3544e-175
Education	Primary or less (%)	Male	1966_1970	5.44	5.32	IDESCAT	1.02506	0.821042	1.26611	0.785881
Education	Primary or less (%)	Male	1961_1965	7.75	6.25	IDESCAT	1.25873	1.04271	1.50846	0.014757
Education	Primary or less (%)	Male	1956_1960	12.27	8.43	IDESCAT	1.52315	1.27595	1.80781	4.59993e-06
Education	Primary or less (%)	Male	1951_1955	20.39	13.51	IDESCAT	1.64139	1.39619	1.92236	3.42394e-09
Education	Secondary 1 (%)	Male	1966_1970	10.88	29.94	IDESCAT	0.286301	0.244293	0.333997	8.66813e-78
Education	Secondary 1 (%)	Male	1961_1965	11.47	34.39	IDESCAT	0.247177	0.211415	0.287623	4.31483e-102
Education	Secondary 1 (%)	Male	1956_1960	9.12	37.4	IDESCAT	0.168411	0.137556	0.204574	9.53705e-114
Education	Secondary 1 (%)	Male	1951_1955	9.68	39.14	IDESCAT	0.166845	0.133368	0.206602	1.72985e-94
Education	Secondary 2 (%)	Male	1966_1970	26.49	28.32	IDESCAT	0.914239	0.818528	1.01972	0.109919
Education	Secondary 2 (%)	Male	1961_1965	29.19	27.25	IDESCAT	1.1005	0.987748	1.22464	0.0772789
Education	Secondary 2 (%)	Male	1956_1960	28.41	25.35	IDESCAT	1.17243	1.03286	1.32864	0.0127083
Education	Secondary 2 (%)	Male	1951_1955	23.27	21.03	IDESCAT	1.14041	0.977834	1.32573	0.0893928
Education	Higher (%)	Male	1966_1970	57.01	36.41	IDESCAT	2.32498	2.10849	2.56444	2.93499e-66
Education	Higher (%)	Male	1961_1965	51.59	32.1	IDESCAT	2.25431	2.04463	2.48568	3.36536e-60
Education	Higher (%)	Male	1956_1960	49.96	28.82	IDESCAT	2.47778	2.21186	2.77586	3.54809e-55
Education	Higher (%)	Male	1951_1955	46.55	26.31	IDESCAT	2.44432	2.1488	2.77972	2.15004e-41
Education	Primary or less (%)	Female	1966_1970	7.71	5.26	IDESCAT	1.50715	1.28899	1.75347	4.13998e-07
Education	Primary or less (%)	Female	1961_1965	11.1	6.83	IDESCAT	1.70744	1.49793	1.94002	1.06387e-14
Education	Primary or less (%)	Female	1956_1960	20.89	10.42	IDESCAT	2.2832	2.03181	2.56094	5.01616e-39
Education	Primary or less (%)	Female	1951_1955	30.45	19.12	IDESCAT	1.86313	1.64312	2.1094	2.79645e-21
Education	Secondary 1 (%)	Female	1966_1970	10	26.47	IDESCAT	0.309295	0.269471	0.353696	5.61791e-89
Education	Secondary 1 (%)	Female	1961_1965	11.02	33.09	IDESCAT	0.250973	0.220218	0.28508	7.84707e-141
Education	Secondary 1 (%)	Female	1956_1960	14.39	40.41	IDESCAT	0.249067	0.217552	0.28424	3.76681e-127
Education	Secondary 1 (%)	Female	1951_1955	9.98	42.94	IDESCAT	0.148089	0.121671	0.178858	1.261e-139
Education	Secondary 2 (%)	Female	1966_1970	27.16	27.37	IDESCAT	0.992842	0.905702	1.0874	0.890196
Education	Secondary 2 (%)	Female	1961_1965	28.64	27.5	IDESCAT	1.06081	0.969849	1.15927	0.193916
Education	Secondary 2 (%)	Female	1956_1960	26.35	23.58	IDESCAT	1.16669	1.04826	1.29685	0.00453366
Education	Secondary 2 (%)	Female	1951_1955	26.98	18.91	IDESCAT	1.59364	1.39868	1.81228	4.625e-12
Education	Higher (%)	Female	1966_1970	54.89	40.9	IDESCAT	1.76838	1.62981	1.91913	1.14073e-43
Education	Higher (%)	Female	1961_1965	49.04	32.57	IDESCAT	1.99996	1.84486	2.16788	1.93755e-63
Education	Higher (%)	Female	1956_1960	37.93	25.59	IDESCAT	1.7895	1.62425	1.97057	3.93266e-31
Education	Higher (%)	Female	1951_1955	32.18	19.04	IDESCAT	2.02982	1.79352	2.29387	9.12134e-28
Education	Primary or less (%)	All	All	13.24	22.15	ESCA	0.536644	0.468989	0.615311	2.16228e-18
Education	Secondary 1 (%)	All	All	10.99	22.01	ESCA	0.437608	0.381621	0.502661	1.68748e-29
Education	Secondary 2 (%)	All	All	27.37	24.07	ESCA	1.18846	1.04645	1.35218	0.00749476
Education	Higher (%)	All	All	48.4	31.77	ESCA	2.01389	1.79206	2.26555	2.94751e-34
Education	Primary or less (%)	Male	All	10.27	21.15	ESCA	0.485808	0.3992	0.593572	3.25637e-12
Education	Secondary 1 (%)	Male	All	10.47	20.87	ESCA	0.501634	0.412001	0.61326	3.14161e-11
Education	Secondary 2 (%)	Male	All	27.2	24.56	ESCA	1.10759	0.930111	1.32399	0.263234
Education	Higher (%)	Male	All	52.06	33.42	ESCA	1.55747	1.33627	1.81985	4.71441e-09
Education	Primary or less (%)	Female	All	15.35	23.16	ESCA	0.662718	0.552989	0.797514	1.37466e-05
Education	Secondary 1 (%)	Female	All	11.36	23.16	ESCA	0.490453	0.407894	0.592079	4.76837e-13
Education	Secondary 2 (%)	Female	All	27.49	23.58	ESCA	1.16571	0.977995	1.3954	0.0879059
Education	Higher (%)	Female	All	45.81	30.1	ESCA	1.52188	1.29887	1.78873	7.30492e-08
Employment	Employed (%)	All	All	71.29	64.08	INE	1.3915	1.33969	1.44561	2.76668e-68
Employment	Unemployed (%)	All	All	10.42	12.06	INE	0.848307	0.801445	0.897285	4.70547e-09
Employment	Inactive (%)	All	All	18.29	23.86	INE	0.714534	0.68328	0.746952	2.20518e-53
Employment	Employed (%)	Male	All	75.61	69.89	INE	1.33556	1.25515	1.42192	7.0362e-21
Employment	Unemployed (%)	Male	All	9.53	11.59	INE	0.803571	0.732621	0.879837	1.19863e-06
Employment	Inactive (%)	Male	All	14.86	18.52	INE	0.767829	0.71168	0.827597	1.1093e-12
Employment	Employed (%)	Female	All	68.22	58.4	INE	1.52889	1.45679	1.60492	7.50937e-70
Employment	Unemployed (%)	Female	All	11.05	12.52	INE	0.868298	0.807509	0.932841	8.6565e-05
Employment	Inactive (%)	Female	All	20.73	29.08	INE	0.637734	0.6031	0.674103	5.47949e-62
Employment	Employed (%)	Male	45-54	89	79.14	INE	2.13149	1.90699	2.3884	6.21765e-49
Employment	Employed (%)	Male	55-65	56.73	58.7	INE	0.922237	0.847878	1.00337	0.0570901
Employment	Unemployed (%)	Male	45-54	7.5	12.68	INE	0.558768	0.487739	0.637675	6.95952e-21
Employment	Unemployed (%)	Male	55-65	12.4	10.28	INE	1.23481	1.08552	1.40033	0.00125997
Employment	Inactive (%)	Male	45-54	3.5	8.18	INE	0.407162	0.334059	0.491847	6.48134e-27
Employment	Inactive (%)	Male	55-65	30.88	31.02	INE	0.993497	0.90732	1.08705	0.909405
Employment	Employed (%)	Female	45-54	78.47	68.74	INE	1.65732	1.54435	1.77985	6.26744e-49
Employment	Employed (%)	Female	55-65	52.75	46.84	INE	1.26721	1.17957	1.36152	7.01021e-11
Employment	Unemployed (%)	Female	45-54	9.42	14.02	INE	0.637392	0.576043	0.703829	3.34579e-21
Employment	Unemployed (%)	Female	55-65	13.52	10.84	INE	1.2863	1.15663	1.42764	4.13398e-06
Employment	Inactive (%)	Female	45-54	12.12	17.24	INE	0.661855	0.604688	0.72332	9.14805e-22
Employment	Inactive (%)	Female	55-65	33.72	42.32	INE	0.693495	0.642734	0.747892	2.50686e-22
Occupation	Working (%)	All	All	71.47	61.63	ESCA	1.55356	1.38579	1.74058	3.70666e-14
Occupation	Retired (%)	All	All	7.08	4.59	ESCA	1.57309	1.21866	2.05964	0.000289491
Occupation	Home duties (%)	All	All	6.54	11.21	ESCA	0.552836	0.462426	0.663896	4.87499e-10
Occupation	Incapacity (%)	All	All	2.4	7.85	ESCA	0.288262	0.230274	0.362824	1.37787e-23
Occupation	Unemployed (%)	All	All	12.5	14.71	ESCA	0.839112	0.717875	0.984265	0.0277685
Occupation	Working (%)	Male	All	75.81	66.57	ESCA	1.13952	1.00808	1.28892	0.0348132
Occupation	Retired (%)	Male	All	9.54	5.7	ESCA	1.67697	1.21075	2.37637	0.00117636
Occupation	Home duties (%)	Male	All	0.76	0.01	ESCA	Inf	1.4436	Inf	0.0125356
Occupation	Incapacity (%)	Male	All	2.49	9.44	ESCA	0.262116	0.193056	0.358337	4.41711e-16
Occupation	Unemployed (%)	Male	All	11.4	18.28	ESCA	0.623208	0.50831	0.767914	9.35579e-06
Occupation	Working (%)	Female	All	68.39	56.89	ESCA	1.20228	1.05735	1.36841	0.00467001
Occupation	Retired (%)	Female	All	5.33	3.51	ESCA	1.51863	1.00554	2.39137	0.0499446
Occupation	Home duties (%)	Female	All	10.65	22.36	ESCA	0.477049	0.395067	0.578473	1.84577e-13
Occupation	Incapacity (%)	Female	All	2.34	6.3	ESCA	0.370328	0.263322	0.530056	1.12216e-07
Occupation	Unemployed (%)	Female	All	13.29	10.95	ESCA	1.21279	0.94962	1.56645	0.131095
Civil status	Single (%)	All	All	9.29	13.54	IDESCAT	0.654092	0.616503	0.69349	2.41237e-51
Civil status	Married (%)	All	All	73.5	71.26	IDESCAT	1.119	1.07673	1.16319	7.59471e-09
Civil status	Separated/Divorced (%)	All	All	13.82	10.85	IDESCAT	1.31772	1.25383	1.38428	1.95029e-26
Civil status	Widowed (%)	All	All	3.38	4.36	IDESCAT	0.769389	0.698979	0.845091	1.43091e-08
Civil status	Single (%)	Male	All	7.81	15.59	IDESCAT	0.458617	0.414789	0.505991	1.40342e-67
Civil status	Married (%)	Male	All	79.18	72.95	IDESCAT	1.41039	1.32153	1.50626	8.28144e-27
Civil status	Separated/Divorced (%)	Male	All	11.46	9.88	IDESCAT	1.18054	1.08512	1.28261	0.000117243
Civil status	Widowed (%)	Male	All	1.55	1.58	IDESCAT	0.979785	0.782094	1.2128	0.91409
Civil status	Single (%)	Female	All	10.34	11.51	IDESCAT	0.88671	0.823459	0.95384	0.00110017
Civil status	Married (%)	Female	All	69.48	69.58	IDESCAT	0.995492	0.948511	1.04504	0.853674
Civil status	Separated/Divorced (%)	Female	All	15.49	11.81	IDESCAT	1.36892	1.28645	1.45577	3.42087e-22
Civil status	Widowed (%)	Female	All	4.68	7.1	IDESCAT	0.642823	0.577289	0.713991	1.20193e-18
Civil status	Single (%)	Male	45-49	12.56	19.52	IDESCAT	0.594265	0.507776	0.692302	1.12944e-12
Civil status	Single (%)	Male	50-54	8.14	13.42	IDESCAT	0.571636	0.476243	0.681419	1.97043e-11
Civil status	Single (%)	Male	55-59	4.73	9.45	IDESCAT	0.476538	0.360342	0.619387	7.13942e-10
Civil status	Single (%)	Male	60-64	3.42	8.05	IDESCAT	0.404524	0.276683	0.572404	6.29409e-09
Civil status	Married (%)	Male	45-49	73.31	68.43	IDESCAT	1.28296	1.14325	1.4421	1.51428e-05
Civil status	Married (%)	Male	50-54	78.15	73.76	IDESCAT	1.2756	1.135	1.43651	2.97813e-05
Civil status	Married (%)	Male	55-59	82.28	77.84	IDESCAT	1.33366	1.15112	1.55084	8.09053e-05
Civil status	Married (%)	Male	60-64	85.39	81.04	IDESCAT	1.36735	1.14194	1.64723	0.000456122
Civil status	Separated/Divorced (%)	Male	45-49	13.15	11.34	IDESCAT	1.18846	1.01858	1.38074	0.0254848
Civil status	Separated/Divorced (%)	Male	50-54	12.65	11.64	IDESCAT	1.10039	0.948122	1.27202	0.194756
Civil status	Separated/Divorced (%)	Male	55-59	10.83	10.85	IDESCAT	0.999595	0.829351	1.19676	1
Civil status	Separated/Divorced (%)	Male	60-64	7.67	8.23	IDESCAT	0.925753	0.719812	1.17514	0.557344
Civil status	Widowed (%)	Male	45-49	0.66	0.71	IDESCAT	0.92371	0.441369	1.70691	1
Civil status	Widowed (%)	Male	50-54	1.01	1.18	IDESCAT	0.852695	0.49483	1.37185	0.649451
Civil status	Widowed (%)	Male	55-59	2	1.86	IDESCAT	1.08151	0.696232	1.60679	0.67322
Civil status	Widowed (%)	Male	60-64	3.52	2.68	IDESCAT	1.32614	0.91178	1.86897	0.109423
Civil status	Single (%)	Female	45-49	13.06	14.14	IDESCAT	0.913192	0.803654	1.0347	0.157819
Civil status	Single (%)	Female	50-54	11.14	10	IDESCAT	1.13079	0.992504	1.28427	0.0620582
Civil status	Single (%)	Female	55-59	7.83	7.75	IDESCAT	1.0145	0.850238	1.2028	0.861672
Civil status	Single (%)	Female	60-64	7.3	6.74	IDESCAT	1.09089	0.863639	1.36238	0.445576
Civil status	Married (%)	Female	45-49	68.44	69.47	IDESCAT	0.9555	0.872467	1.04726	0.329384
Civil status	Married (%)	Female	50-54	69.15	71.69	IDESCAT	0.891249	0.816869	0.973094	0.00999878
Civil status	Married (%)	Female	55-59	70.17	72.07	IDESCAT	0.91846	0.830471	1.01682	0.0968254
Civil status	Married (%)	Female	60-64	70.9	70.83	IDESCAT	1.00929	0.887789	1.14941	0.922694
Civil status	Separated/Divorced (%)	Female	45-49	17.14	13.81	IDESCAT	1.29232	1.15315	1.44526	1.06642e-05
Civil status	Separated/Divorced (%)	Female	50-54	16.06	13.67	IDESCAT	1.21142	1.08391	1.35122	0.000728577
Civil status	Separated/Divorced (%)	Female	55-59	15.24	12.59	IDESCAT	1.25132	1.09818	1.42171	0.000750324
Civil status	Separated/Divorced (%)	Female	60-64	11.59	9.53	IDESCAT	1.24631	1.03317	1.49353	0.0185854
Civil status	Widowed (%)	Female	45-49	1.27	2.58	IDESCAT	0.486982	0.322582	0.706454	3.33179e-05
Civil status	Widowed (%)	Female	50-54	3.44	4.64	IDESCAT	0.733768	0.582618	0.913085	0.00422962
Civil status	Widowed (%)	Female	55-59	6.55	7.6	IDESCAT	0.853509	0.703985	1.02671	0.0947406
Civil status	Widowed (%)	Female	60-64	10.04	12.89	IDESCAT	0.755621	0.618484	0.915888	0.00372005
Household size	1 (%)	All	All	10.09	8.51	ESCA	1.20882	0.995887	1.47741	0.0529953
Household size	2 (%)	All	All	28.46	32.66	ESCA	0.821479	0.73079	0.924256	0.00101236
Household size	3 (%)	All	All	26.8	25.35	ESCA	1.0777	0.950902	1.22341	0.248746
Household size	4 (%)	All	All	28.32	25.47	ESCA	1.15421	1.01884	1.30969	0.0231442
Household size	5+ (%)	All	All	6.33	8.01	ESCA	0.775095	0.632653	0.956334	0.0160124
Household size	1 (%)	Male	All	8.72	8.38	ESCA	1.03851	0.786286	1.39092	0.835291
Household size	2 (%)	Male	All	26.68	30.19	ESCA	0.882898	0.750604	1.04133	0.130704
Household size	3 (%)	Male	All	26.19	25.72	ESCA	1.01735	0.85696	1.21197	0.863237
Household size	4 (%)	Male	All	31.25	27.65	ESCA	1.13037	0.957454	1.33883	0.153322
Household size	5+ (%)	Male	All	7.16	8.06	ESCA	0.895538	0.671913	1.21109	0.452521
Household size	1 (%)	Female	All	11.06	8.65	ESCA	1.28665	0.981474	1.71187	0.0685826
Household size	2 (%)	Female	All	29.72	35.07	ESCA	0.846927	0.727284	0.988499	0.0318576
Household size	3 (%)	Female	All	27.23	24.98	ESCA	1.09088	0.918553	1.30065	0.328612
Household size	4 (%)	Female	All	26.24	23.34	ESCA	1.12618	0.943881	1.34952	0.194315
Household size	5+ (%)	Female	All	5.74	7.96	ESCA	0.71386	0.535858	0.965484	0.0224342

## Sheet: Table S4
Table S4. Table of the comparison results in lifestyle habits between GCAT cohort and general population of Catalonia.
Variable	Value	Sex	Age	GCAT	General Population	Source	OR	CI 95% lower	CI 95% upper	p-value
Smoking habit	Smoker (%)	All	All	19.8	28.21	SIDIAP	0.628559	0.602098	0.656027	7.51603e-110
Smoking habit	Ex-smoker (%)	All	All	42.62	26.22	SIDIAP	2.08992	2.01871	2.16357	0
Smoking habit	Non smoker (%)	All	All	37.58	45.57	SIDIAP	0.718906	0.693956	0.74468	2.73517e-77
Smoking habit	Smoker (%)	Male	All	18.08	32.07	SIDIAP	0.467479	0.436079	0.500755	3.10138e-121
Smoking habit	Ex-smoker (%)	Male	All	46.85	32.29	SIDIAP	1.84872	1.75268	1.94984	1.732e-111
Smoking habit	Non smoker (%)	Male	All	35.07	35.65	SIDIAP	0.975208	0.922236	1.03098	0.375603
Smoking habit	Smoker (%)	Female	All	21.03	24.47	SIDIAP	0.822009	0.777831	0.868328	8.88729e-13
Smoking habit	Ex-smoker (%)	Female	All	39.62	20.35	SIDIAP	2.56785	2.45231	2.6884	0
Smoking habit	Non smoker (%)	Female	All	39.35	55.18	SIDIAP	0.527052	0.503387	0.551758	1.4967e-171
Smoking habit	Smoker (%)	Male	1951_1955	11.4286	23.4055	SIDIAP	0.422243	0.503387	0.551758	4.07046e-17
Smoking habit	Smoker (%)	Male	1956_1960	13.1723	30.4855	SIDIAP	0.345939	0.503387	0.551758	3.93888e-34
Smoking habit	Smoker (%)	Male	1961_1965	18.5155	35.5776	SIDIAP	0.411455	0.503387	0.551758	4.84329e-39
Smoking habit	Smoker (%)	Male	1966_1970	19.0552	36.3087	SIDIAP	0.41295	0.503387	0.551758	3.25535e-40
Smoking habit	Ex-smoker (%)	Male	1951_1955	41.1688	43.4524	SIDIAP	0.910647	0.503387	0.551758	0.215197
Smoking habit	Ex-smoker (%)	Male	1956_1960	38.5291	36.4856	SIDIAP	1.09111	0.503387	0.551758	0.201834
Smoking habit	Ex-smoker (%)	Male	1961_1965	30.0979	29.7065	SIDIAP	1.01885	0.503387	0.551758	0.777797
Smoking habit	Ex-smoker (%)	Male	1966_1970	22.498	23.3158	SIDIAP	0.954718	0.503387	0.551758	0.523608
Smoking habit	Non smoker (%)	Male	1951_1955	47.4026	33.1421	SIDIAP	1.81815	0.503387	0.551758	3.4986e-16
Smoking habit	Non smoker (%)	Male	1956_1960	48.2986	33.0289	SIDIAP	1.89427	0.503387	0.551758	2.6918e-21
Smoking habit	Non smoker (%)	Male	1961_1965	51.3866	34.7159	SIDIAP	1.98785	0.503387	0.551758	1.48286e-32
Smoking habit	Non smoker (%)	Male	1966_1970	58.4468	40.3755	SIDIAP	2.07715	0.503387	0.551758	1.53801e-37
Smoking habit	Smoker (%)	Female	1951_1955	9.51417	13.7176	SIDIAP	0.661359	0.503387	0.551758	7.63708e-05
Smoking habit	Smoker (%)	Female	1956_1960	15.6609	23.0207	SIDIAP	0.620947	0.503387	0.551758	1.55887e-11
Smoking habit	Smoker (%)	Female	1961_1965	20.6749	29.5676	SIDIAP	0.620851	0.503387	0.551758	4.99465e-18
Smoking habit	Smoker (%)	Female	1966_1970	22.8118	29.4026	SIDIAP	0.709569	0.503387	0.551758	3.32965e-10
Smoking habit	Ex-smoker (%)	Female	1951_1955	20.5466	18.8546	SIDIAP	1.11297	0.503387	0.551758	0.178244
Smoking habit	Ex-smoker (%)	Female	1956_1960	28.0891	22.4838	SIDIAP	1.34668	0.503387	0.551758	1.11417e-06
Smoking habit	Ex-smoker (%)	Female	1961_1965	25.2276	21.3965	SIDIAP	1.23946	0.503387	0.551758	8.06745e-05
Smoking habit	Ex-smoker (%)	Female	1966_1970	24.0153	18.7072	SIDIAP	1.37343	0.503387	0.551758	2.03292e-08
Smoking habit	Non smoker (%)	Female	1951_1955	69.9393	67.4279	SIDIAP	1.1239	0.503387	0.551758	0.0951949
Smoking habit	Non smoker (%)	Female	1956_1960	56.25	54.4955	SIDIAP	1.07361	0.503387	0.551758	0.194642
Smoking habit	Non smoker (%)	Female	1961_1965	54.0975	49.0358	SIDIAP	1.22487	0.503387	0.551758	1.48643e-05
Smoking habit	Non smoker (%)	Female	1966_1970	53.1729	51.8902	SIDIAP	1.0528	0.503387	0.551758	0.279435
Smoking habit	Smoker (%)	All	All	19.8	29.3	ESCA	0.596126	0.527159	0.674967	6.53743e-16
Smoking habit	Ex-smoker (%)	All	All	42.62	21.77	ESCA	2.66511	2.33705	3.04607	5.5551e-56
Smoking habit	Non smoker (%)	All	All	37.58	48.92	ESCA	0.628719	0.562603	0.70257	1.43793e-16
Smoking habit	Smoker (%)	Male	All	18.08	34.22	ESCA	0.529956	0.451043	0.624047	5.252e-14
Smoking habit	Ex-smoker (%)	Male	All	46.85	26.91	ESCA	1.73762	1.47154	2.0591	8.34865e-12
Smoking habit	Non smoker (%)	Male	All	35.07	38.87	ESCA	0.901031	0.776638	1.04731	0.170075
Smoking habit	Smoker (%)	Female	All	21.03	24.41	ESCA	0.860855	0.720926	1.03221	0.094128
Smoking habit	Ex-smoker (%)	Female	All	39.62	16.66	ESCA	2.37024	1.93711	2.92093	3.83605e-20
Smoking habit	Non smoker (%)	Female	All	39.35	58.94	ESCA	0.668608	0.5869	0.762381	1.80998e-09
Alcohol consumption	High risk (%)	All	All	3.96	2.53	SIDIAP	1.59243	1.45605	1.73847	2.46286e-22
Alcohol consumption	Low risk (%)	All	All	75.24	47.95	SIDIAP	3.29952	3.17173	3.43347	0
Alcohol consumption	Non drinker (%)	All	All	20.79	49.53	SIDIAP	0.267562	0.256427	0.279027	0
Alcohol consumption	High risk (%)	Male	All	4.62	4.36	SIDIAP	1.06195	0.932513	1.2048	0.35499
Alcohol consumption	Low risk (%)	Male	All	84.33	57.63	SIDIAP	3.95566	3.67794	4.25827	0
Alcohol consumption	Non drinker (%)	Male	All	11.06	38.01	SIDIAP	0.202722	0.186092	0.220547	0
Alcohol consumption	High risk (%)	Female	All	3.5	0.79	SIDIAP	4.58387	4.03443	5.18998	7.25556e-87
Alcohol consumption	Low risk (%)	Female	All	68.78	38.74	SIDIAP	3.48387	3.31954	3.65716	0
Alcohol consumption	Non drinker (%)	Female	All	27.72	60.47	SIDIAP	0.250644	0.23836	0.263494	0
Alcohol consumption	High risk (%)	Male	1951_1955	6.41158	3.98011	SIDIAP	1.65274	0.535858	0.965484	0.000361483
Alcohol consumption	High risk (%)	Male	1956_1960	5.98222	4.55743	SIDIAP	1.33252	0.535858	0.965484	0.0199399
Alcohol consumption	High risk (%)	Male	1961_1965	4.7619	4.6945	SIDIAP	1.01508	0.535858	0.965484	0.861167
Alcohol consumption	High risk (%)	Male	1966_1970	2.43757	4.17152	SIDIAP	0.573947	0.535858	0.965484	0.000173211
Alcohol consumption	Low risk (%)	Male	1951_1955	83.5574	60.3476	SIDIAP	3.33901	0.535858	0.965484	8.11351e-55
Alcohol consumption	Low risk (%)	Male	1956_1960	83.8319	58.9979	SIDIAP	3.60339	0.535858	0.965484	9.27787e-79
Alcohol consumption	Low risk (%)	Male	1961_1965	83.484	57.1507	SIDIAP	3.78976	0.535858	0.965484	2.51926e-115
Alcohol consumption	Low risk (%)	Male	1966_1970	85.9691	54.778	SIDIAP	5.05815	0.535858	0.965484	9.1268e-164
Alcohol consumption	Non drinker (%)	Male	1951_1955	10.031	35.6723	SIDIAP	0.201085	0.535858	0.965484	1.1287e-74
Alcohol consumption	Non drinker (%)	Male	1956_1960	10.1859	36.4447	SIDIAP	0.1978	0.535858	0.965484	3.44657e-98
Alcohol consumption	Non drinker (%)	Male	1961_1965	11.7541	38.1548	SIDIAP	0.215901	0.535858	0.965484	3.61243e-127
Alcohol consumption	Non drinker (%)	Male	1966_1970	11.5933	41.0505	SIDIAP	0.188317	0.535858	0.965484	2.08387e-155
Alcohol consumption	High risk (%)	Female	1951_1955	5.3075	0.616376	SIDIAP	9.03705	0.535858	0.965484	1.5606e-36
Alcohol consumption	High risk (%)	Female	1956_1960	3.71809	0.809686	SIDIAP	4.7306	0.535858	0.965484	2.13881e-23
Alcohol consumption	High risk (%)	Female	1961_1965	3.42127	0.885499	SIDIAP	3.96506	0.535858	0.965484	9.498e-24
Alcohol consumption	High risk (%)	Female	1966_1970	2.51572	0.809249	SIDIAP	3.16305	0.535858	0.965484	1.27184e-13
Alcohol consumption	Low risk (%)	Female	1951_1955	67.3968	36.3197	SIDIAP	3.62442	0.535858	0.965484	2.14887e-103
Alcohol consumption	Low risk (%)	Female	1956_1960	69.7003	39.311	SIDIAP	3.55132	0.535858	0.965484	4.55193e-148
Alcohol consumption	Low risk (%)	Female	1961_1965	69.8681	40.0767	SIDIAP	3.46699	0.535858	0.965484	2.50753e-190
Alcohol consumption	Low risk (%)	Female	1966_1970	67.673	38.9916	SIDIAP	3.27541	0.535858	0.965484	1.31828e-173
Alcohol consumption	Non drinker (%)	Female	1951_1955	27.2957	63.0639	SIDIAP	0.219893	0.535858	0.965484	6.58537e-137
Alcohol consumption	Non drinker (%)	Female	1956_1960	26.5816	59.8793	SIDIAP	0.24259	0.535858	0.965484	2.23378e-178
Alcohol consumption	Non drinker (%)	Female	1961_1965	26.7106	59.0378	SIDIAP	0.252872	0.535858	0.965484	5.00784e-225
Alcohol consumption	Non drinker (%)	Female	1966_1970	29.8113	60.1992	SIDIAP	0.280816	0.535858	0.965484	5.54627e-195
Alcohol consumption	High risk (%)	All	All	3.96	3.18	ESCA	1.26762	0.928681	1.76822	0.149045
Alcohol consumption	Low risk (%)	All	All	75.24	67.17	ESCA	1.48304	1.31587	1.66977	1.00868e-10
Alcohol consumption	Non drinker (%)	All	All	20.79	29.65	ESCA	0.623157	0.551388	0.705102	8.32782e-14
Alcohol consumption	High risk (%)	Male	All	4.62	5.47	ESCA	0.839132	0.593504	1.21321	0.308529
Alcohol consumption	Low risk (%)	Male	All	84.33	74.26	ESCA	1.13529	1.00737	1.28003	0.0362629
Alcohol consumption	Non drinker (%)	Male	All	11.06	20.27	ESCA	0.546762	0.448248	0.669913	9.04597e-09
Alcohol consumption	High risk (%)	Female	All	3.5	0.9	ESCA	4.08295	1.84193	11.2647	4.30397e-05
Alcohol consumption	Low risk (%)	Female	All	68.78	60.11	ESCA	1.14361	1.00683	1.30016	0.0365101
Alcohol consumption	Non drinker (%)	Female	All	27.72	39	ESCA	0.710741	0.612	0.827049	8.7252e-06

## Sheet: Table S5
Table S5. Table of the comparison results in health-related factors between GCAT cohort and general population of Catalonia.
Variable	Value	Sex	Age	GCAT	General Population	Source	OR	CI 95% lower	CI 95% upper	p-value
Mortality	Relative mortality (per 1000 person years)	All	All	1.02195	3.76219	SIDIAP	0.271638	0.203433	0.355393	3.82446e-33
Mortality	Relative mortality (per 1000 person years)	Female	All	0.555941	2.38917	SIDIAP	0.232692	0.135501	0.372736	7.56535e-15
Mortality	Relative mortality (per 1000 person years)	Male	All	1.69151	5.13715	SIDIAP	0.32927	0.230559	0.455983	7.30149e-16
Mortality	Relative mortality (per 1000 person years)	Female	40-45	0	0.861849	SIDIAP	0	0	69.5949	1
Mortality	Relative mortality (per 1000 person years)	Female	45-50	0	1.13194	SIDIAP	0	0	0.60088	0.00434362
Mortality	Relative mortality (per 1000 person years)	Female	50-55	0.415927	1.75596	SIDIAP	0.236866	0.0644801	0.60734	0.000419257
Mortality	Relative mortality (per 1000 person years)	Female	55-60	0.497898	2.59849	SIDIAP	0.19161	0.052172	0.49113	1.74506e-05
Mortality	Relative mortality (per 1000 person years)	Female	60-65	1.21895	3.62758	SIDIAP	0.336022	0.134996	0.693088	0.000911427
Mortality	Relative mortality (per 1000 person years)	Female	65-70	1.1842	4.97989	SIDIAP	0.237796	0.0287683	0.860691	0.0202475
Mortality	Relative mortality (per 1000 person years)	Male	40-45	0	1.43392	SIDIAP	0	0	83.5369	1
Mortality	Relative mortality (per 1000 person years)	Male	45-50	0.27383	1.97117	SIDIAP	0.138918	0.00351537	0.774877	0.0123793
Mortality	Relative mortality (per 1000 person years)	Male	50-55	0.898393	3.43776	SIDIAP	0.261331	0.0958516	0.569263	5.97612e-05
Mortality	Relative mortality (per 1000 person years)	Male	55-60	1.30479	5.75989	SIDIAP	0.22653	0.0910389	0.467017	5.43403e-07
Mortality	Relative mortality (per 1000 person years)	Male	60-65	2.38752	8.95897	SIDIAP	0.266495	0.127744	0.490357	2.17984e-07
Mortality	Relative mortality (per 1000 person years)	Male	65-70	8.77435	12.0459	SIDIAP	0.728409	0.37594	1.27435	0.328672
Body mass index	Underweight (%)	All	All	0.2	0.84	ESCA	0.241748	0.118129	0.525112	0.000227404
Body mass index	Normal weight (%)	All	All	29.84	38.86	ESCA	0.668468	0.596882	0.74909	3.80529e-12
Body mass index	Overweight (%)	All	All	43.34	42.95	ESCA	1.01593	0.909277	1.13546	0.780218
Body mass index	Obesity (%)	All	All	26.62	17.34	ESCA	1.72982	1.50007	2.00063	1.97864e-15
Body mass index	Underweight (%)	Male	All	0.09	0.14	ESCA	0.659088	0.073604	31.2128	0.524568
Body mass index	Normal weight (%)	Male	All	20.19	31.84	ESCA	0.628229	0.533991	0.740871	3.4719e-08
Body mass index	Overweight (%)	Male	All	50.72	50.5	ESCA	0.994027	0.868978	1.13839	0.945978
Body mass index	Obesity (%)	Male	All	28.99	16.6	ESCA	1.73716	1.42016	2.13883	1.24019e-08
Body mass index	Underweight (%)	Female	All	0.28	1.52	ESCA	0.182815	0.0845507	0.4193	5.07721e-05
Body mass index	Normal weight (%)	Female	All	36.65	45.18	ESCA	0.806084	0.701196	0.928131	0.00247561
Body mass index	Overweight (%)	Female	All	38.13	34.92	ESCA	1.08486	0.932535	1.2651	0.293159
Body mass index	Obesity (%)	Female	All	24.94	17.81	ESCA	1.39694	1.14798	1.71057	0.000586502
Self-perceived health status	Very good (%)	All	All	15.42	15.25	ESCA	1.01045	0.868555	1.17953	0.908868
Self-perceived health status	Good (%)	All	All	72.56	59.76	ESCA	1.77983	1.58946	1.99209	2.28598e-23
Self-perceived health status	Regular (%)	All	All	11.13	18.95	ESCA	0.536639	0.465142	0.620655	2.41415e-16
Self-perceived health status	Bad or very bad (%)	All	All	0.89	6.04	ESCA	0.140644	0.105293	0.188415	2.92517e-35
Self-perceived health status	Very good (%)	Male	All	14.56	4.77	ESCA	0.902988	0.732257	1.12069	0.328152
Self-perceived health status	Good (%)	Male	All	74.89	29.88	ESCA	1.19883	1.05829	1.35897	0.00395904
Self-perceived health status	Regular (%)	Male	All	9.78	47.98	ESCA	0.5774	0.467118	0.717617	9.23109e-07
Self-perceived health status	Bad or very bad (%)	Male	All	0.77	17.37	ESCA	0.172945	0.106584	0.282934	5.90908e-12
Self-perceived health status	Very good (%)	Female	All	16.03	5.03	ESCA	1.11116	0.895277	1.39012	0.368827
Self-perceived health status	Good (%)	Female	All	70.91	26.59	ESCA	1.24091	1.09248	1.41085	0.000762619
Self-perceived health status	Regular (%)	Female	All	12.08	43.32	ESCA	0.57691	0.476977	0.70099	4.78128e-08
Self-perceived health status	Bad or very bad (%)	Female	All	0.98	25.06	ESCA	0.130946	0.0904598	0.190697	1.14618e-23
Number of visits to the doctor	Mean (SD) visits per person and year	All	All	1.31 (1.09)	1.19 (1.02)	SIDIAP	NA	NA	NA	1.12913e-34
Number of visits to the doctor	Mean (SD) visits per person and year	Male	All	1.05 (0.88)	0.98 (0.84)	SIDIAP	NA	NA	NA	7.41114e-09
Number of visits to the doctor	Mean (SD) visits per person and year	Female	All	1.49 (1.18)	1.41 (1.13)	SIDIAP	NA	NA	NA	1.48243e-10
Number of visits to the doctor	Mean (SD) visits per person and year	Female	1966_1970	1.47 (1.16)	1.3 (1.11)	SIDIAP	NA	NA	NA	1.20498e-11
Number of visits to the doctor	Mean (SD) visits per person and year	Male	1966_1970	0.95 (0.82)	0.84 (0.78)	SIDIAP	NA	NA	NA	2.15328e-08
Number of visits to the doctor	Mean (SD) visits per person and year	Female	1961_1965	1.48 (1.19)	1.38 (1.13)	SIDIAP	NA	NA	NA	5.23289e-05
Number of visits to the doctor	Mean (SD) visits per person and year	Male	1961_1965	1.02 (0.88)	0.92 (0.82)	SIDIAP	NA	NA	NA	1.61988e-05
Number of visits to the doctor	Mean (SD) visits per person and year	Female	1956_1960	1.51 (1.18)	1.45 (1.12)	SIDIAP	NA	NA	NA	0.021155
Number of visits to the doctor	Mean (SD) visits per person and year	Male	1956_1960	1.09 (0.9)	1.04 (0.86)	SIDIAP	NA	NA	NA	0.0581442
Number of visits to the doctor	Mean (SD) visits per person and year	Female	1951_1955	1.56 (1.2)	1.55 (1.13)	SIDIAP	NA	NA	NA	0.719668
Number of visits to the doctor	Mean (SD) visits per person and year	Male	1951_1955	1.22 (0.96)	1.21 (0.91)	SIDIAP	NA	NA	NA	0.774655
Elixhauser Comorbidity Index	Mean (SD)	All	All	1.3 (1.41)	1.67 (1.67)	SIDIAP	NA	NA	NA	2.19547e-186
Disease prevalence	E11 - Type 2 diabetes mellitus (%)	Female	All	3.52059	7.5743	SIDIAP	0.445278	0.393399	0.502178	1.10075e-50
Disease prevalence	E11 - Type 2 diabetes mellitus (%)	Male	All	7.24039	13.1167	SIDIAP	0.517029	0.465926	0.572404	2.8252e-44
Disease prevalence	E66 - Overweight and obesity (%)	Female	All	25.9278	27.2695	SIDIAP	0.93358	0.887035	0.982258	0.00784203
Disease prevalence	E66 - Overweight and obesity (%)	Male	All	26.5361	25.4793	SIDIAP	1.05646	0.994551	1.12175	0.0734316
Disease prevalence	E78 - Disorders of lipoprotein metabolism and other lipidemias (%)	Female	All	29.9568	32.028	SIDIAP	0.907678	0.864371	0.952925	8.33979e-05
Disease prevalence	E78 - Disorders of lipoprotein metabolism and other lipidemias (%)	Male	All	33.6867	33.984	SIDIAP	0.986808	0.932776	1.0437	0.649599
Disease prevalence	F10 - Alcohol related disorders (%)	Female	All	0.521098	1.59115	SIDIAP	0.323963	0.232196	0.440173	2.98555e-18
Disease prevalence	F10 - Alcohol related disorders (%)	Male	All	2.58714	7.97762	SIDIAP	0.306354	0.257748	0.361593	5.7704e-65
Disease prevalence	F17 - Nicotine dependence (%)	Female	All	22.0768	24.7692	SIDIAP	0.860506	0.815219	0.907956	2.58539e-08
Disease prevalence	F17 - Nicotine dependence (%)	Male	All	21.9368	34.3679	SIDIAP	0.536648	0.503156	0.572032	1.12551e-90
Disease prevalence	F32 - Major depressive disorder, single episode (%)	Female	All	14.7306	15.0787	SIDIAP	0.972918	0.913061	1.03599	0.401455
Disease prevalence	F32 - Major depressive disorder, single episode (%)	Male	All	6.97089	7.31931	SIDIAP	0.948829	0.853335	1.05252	0.339258
Disease prevalence	F41 - Other anxiety disorders (%)	Female	All	34.0493	35.0174	SIDIAP	0.958078	0.913889	1.00423	0.0748708
Disease prevalence	F41 - Other anxiety disorders (%)	Male	All	19.3137	18.6984	SIDIAP	1.04079	0.972645	1.11292	0.24091
Disease prevalence	G43 - Migraine (%)	Female	All	9.44331	8.17138	SIDIAP	1.17189	1.0847	1.2646	6.05347e-05
Disease prevalence	G43 - Migraine (%)	Male	All	2.8746	2.2261	SIDIAP	1.29993	1.10301	1.52258	0.00164908
Disease prevalence	I10 - Essential (primary) hypertension (%)	Female	All	17.1581	23.6865	SIDIAP	0.667313	0.628707	0.707848	7.64078e-45
Disease prevalence	I10 - Essential (primary) hypertension (%)	Male	All	27.3626	30.2968	SIDIAP	0.866672	0.816385	0.919687	1.68966e-06
Disease prevalence	I20 - Angina pectoris (%)	Female	All	0.279614	0.471172	SIDIAP	0.592303	0.37052	0.898748	0.0100779
Disease prevalence	I20 - Angina pectoris (%)	Male	All	0.718649	1.27183	SIDIAP	0.561902	0.400748	0.766691	8.91291e-05
Disease prevalence	I25 - Chronic ischemic heart disease (%)	Female	All	0.203355	0.604611	SIDIAP	0.335008	0.191219	0.54491	2.22816e-07
Disease prevalence	I25 - Chronic ischemic heart disease (%)	Male	All	1.14984	2.71066	SIDIAP	0.417493	0.320935	0.534232	1.44738e-15
Disease prevalence	I48 - Atrial fibrillation and flutter (%)	Female	All	0.495679	0.993571	SIDIAP	0.49639	0.352435	0.679793	1.36662e-06
Disease prevalence	I48 - Atrial fibrillation and flutter (%)	Male	All	1.2756	2.12364	SIDIAP	0.595506	0.464172	0.752853	3.49929e-06
Disease prevalence	I50 - Heart failure (%)	Female	All	0.101678	0.500921	SIDIAP	0.202178	0.0872081	0.398936	2.52402e-09
Disease prevalence	I50 - Heart failure (%)	Male	All	0.251527	1.11955	SIDIAP	0.222725	0.121613	0.374162	3.28816e-13
Disease prevalence	I63 - Cerebral infarction (%)	Female	All	0.305033	0.899139	SIDIAP	0.337255	0.215765	0.50253	2.58353e-10
Disease prevalence	I63 - Cerebral infarction (%)	Male	All	0.538987	1.78768	SIDIAP	0.297694	0.200576	0.425708	4.41505e-16
Disease prevalence	I70 - Atherosclerosis (%)	Female	All	0.533808	0.466728	SIDIAP	1.14449	0.822795	1.55147	0.360964
Disease prevalence	I70 - Atherosclerosis (%)	Male	All	0.628818	0.733159	SIDIAP	0.856783	0.595575	1.19442	0.429403
Disease prevalence	J30 - Vasomotor and allergic rhinitis (%)	Female	All	12.786	12.0551	SIDIAP	1.06954	0.999714	1.14324	0.0493616
Disease prevalence	J30 - Vasomotor and allergic rhinitis (%)	Male	All	11.696	8.8422	SIDIAP	1.36549	1.25593	1.48273	8.08324e-13
Disease prevalence	J44 - Other chronic obstructive pulmonary disease (%)	Female	All	1.27097	2.18749	SIDIAP	0.575624	0.467509	0.701523	2.62159e-09
Disease prevalence	J44 - Other chronic obstructive pulmonary disease (%)	Male	All	1.97628	4.48264	SIDIAP	0.429603	0.352329	0.519015	1.10056e-23
Disease prevalence	J45 - Asthma (%)	Female	All	5.7575	6.09548	SIDIAP	0.941163	0.853734	1.03545	0.218162
Disease prevalence	J45 - Asthma (%)	Male	All	4.34783	3.66947	SIDIAP	1.19326	1.04413	1.35835	0.0090096
Disease prevalence	L40 - Psoriasis (%)	Female	All	3.08846	2.88406	SIDIAP	1.0731	0.939951	1.2203	0.27886
Disease prevalence	L40 - Psoriasis (%)	Male	All	3.55731	3.48026	SIDIAP	1.02296	0.882727	1.17964	0.741219
Disease prevalence	M81 - Osteoporosis without current pathological fracture (%)	Female	All	6.03711	6.47136	SIDIAP	0.928584	0.844204	1.01945	0.122777
Disease prevalence	M81 - Osteoporosis without current pathological fracture (%)	Male	All	0.431189	0.403575	SIDIAP	1.0687	0.683156	1.5947	0.749506
Cancer prevalence	C16 - Malignant neoplasm of stomach (%)	Female	All	0.0254194	0.0940615	SIDIAP	0.270063	0.0326347	0.979205	0.0402429
Cancer prevalence	C16 - Malignant neoplasm of stomach (%)	Male	All	0.0718649	0.156325	SIDIAP	0.459333	0.124916	1.17962	0.124035
Cancer prevalence	C18 - Malignant neoplasm of colon (%)	Female	All	0.292323	0.628435	SIDIAP	0.463623	0.293451	0.696921	5.11022e-05
Cancer prevalence	C18 - Malignant neoplasm of colon (%)	Male	All	0.628818	0.86298	SIDIAP	0.726942	0.505394	1.01324	0.0583658
Cancer prevalence	C20 - Malignant neoplasm of rectum (%)	Female	All	0.0381291	0.136895	SIDIAP	0.27826	0.0572899	0.815589	0.0126859
Cancer prevalence	C20 - Malignant neoplasm of rectum (%)	Male	All	0.0898311	0.231789	SIDIAP	0.387014	0.125465	0.905292	0.0237053
Cancer prevalence	C22 - Malignant neoplasm of liver and intrahepatic bile ducts (%)	Female	All	0.0127097	0.0603623	SIDIAP	0.210461	0.00532012	1.17843	0.100536
Cancer prevalence	C22 - Malignant neoplasm of liver and intrahepatic bile ducts (%)	Male	All	0	0.193996	SIDIAP	0	0	0.341481	4.02329e-05
Cancer prevalence	C32 - Malignant neoplasm of larynx (%)	Female	All	0.0254194	0.0285147	SIDIAP	0.891422	0.107295	3.25786	1
Cancer prevalence	C32 - Malignant neoplasm of larynx (%)	Male	All	0.0718649	0.259888	SIDIAP	0.276008	0.0751288	0.708141	0.0031193
Cancer prevalence	C34 - Malignant neoplasm of bronchus and lung (%)	Female	All	0.101678	0.336005	SIDIAP	0.301909	0.130157	0.595998	6.97939e-05
Cancer prevalence	C34 - Malignant neoplasm of bronchus and lung (%)	Male	All	0.28746	0.774264	SIDIAP	0.369474	0.210888	0.60098	4.69304e-06
Cancer prevalence	C43 - Malignant melanoma of skin (%)	Female	All	0.279614	0.426857	SIDIAP	0.654086	0.409097	0.992629	0.0448668
Cancer prevalence	C43 - Malignant melanoma of skin (%)	Male	All	0.215595	0.297435	SIDIAP	0.724251	0.373469	1.26849	0.321391
Cancer prevalence	C44 - Other and unspecified malignant neoplasm of skin (%)	Female	All	1.99542	1.67533	SIDIAP	1.19495	1.01281	1.40094	0.0306162
Cancer prevalence	C44 - Other and unspecified malignant neoplasm of skin (%)	Male	All	1.72476	1.37944	SIDIAP	1.25472	1.01368	1.53666	0.0327507
Cancer prevalence	C50 - Malignant neoplasm of breast (%)	Female	All	1.9573	3.69889	SIDIAP	0.519753	0.440013	0.609947	6.50548e-19
Cancer prevalence	C53 - Malignant neoplasm of cervix uteri (%)	Female	All	0.177936	0.31576	SIDIAP	0.562738	0.307063	0.946483	0.0256943
Cancer prevalence	C54 - Malignant neoplasm of corpus uteri (%)	Female	All	0.152517	0.421796	SIDIAP	0.36063	0.186093	0.631124	4.72825e-05
Cancer prevalence	C56 - Malignant neoplasm of ovary (%)	Female	All	0.101678	0.32292	SIDIAP	0.314184	0.135443	0.620274	0.000120092
Cancer prevalence	C61 - Malignant neoplasm of prostate (%)	Male	All	1.11391	1.09514	SIDIAP	1.01734	0.778188	1.30751	0.84641
Cancer prevalence	C64 - Malignant neoplasm of kidney, except renal pelvis (%)	Female	All	0.139807	0.169854	SIDIAP	0.822853	0.409632	1.47777	0.67791
Cancer prevalence	C64 - Malignant neoplasm of kidney, except renal pelvis (%)	Male	All	0.125764	0.360015	SIDIAP	0.348519	0.139908	0.719455	0.00148924
Cancer prevalence	C67 - Malignant neoplasm of bladder (%)	Female	All	0.088968	0.176026	SIDIAP	0.504985	0.202602	1.04367	0.0759346
Cancer prevalence	C67 - Malignant neoplasm of bladder (%)	Male	All	0.341358	0.817825	SIDIAP	0.415425	0.249739	0.649848	1.7245e-05
Cancer prevalence	C73 - Malignant neoplasm of thyroid gland (%)	Female	All	0.152517	0.323167	SIDIAP	0.471157	0.243009	0.824861	0.00488219
Cancer prevalence	C73 - Malignant neoplasm of thyroid gland (%)	Male	All	0.0179662	0.0946051	SIDIAP	0.189764	0.00480066	1.06086	0.0733271
Cancer prevalence	C78 - Secondary malignant neoplasm of respiratory and digestive organs (%)	Female	All	0.0508388	0.252189	SIDIAP	0.201189	0.0547315	0.51611	3.58302e-05
Cancer prevalence	C78 - Secondary malignant neoplasm of respiratory and digestive organs (%)	Male	All	0.107797	0.307497	SIDIAP	0.349871	0.128245	0.763041	0.00461909
Cancer prevalence	C79 - Secondary malignant neoplasm of other and unspecified sites (%)	Female	All	0.0381291	0.306996	SIDIAP	0.123869	0.0255098	0.362525	1.63863e-07
Cancer prevalence	C79 - Secondary malignant neoplasm of other and unspecified sites (%)	Male	All	0.14373	0.343204	SIDIAP	0.417963	0.180174	0.82525	0.00757783
Cancer prevalence	C80 - Malignant neoplasm without specification of site (%)	Female	All	0.114387	0.176396	SIDIAP	0.648066	0.295619	1.23435	0.223221
Cancer prevalence	C80 - Malignant neoplasm without specification of site (%)	Male	All	0.0898311	0.185529	SIDIAP	0.483735	0.156773	1.13203	0.114878
Cancer prevalence	C96 - Other and unspecified malignant neoplasms of lymphoid, hematopoietic and related tissue (%)	Female	All	0.101678	0.11949	SIDIAP	0.850777	0.366145	1.68387	0.868641
Cancer prevalence	C96 - Other and unspecified malignant neoplasms of lymphoid, hematopoietic and related tissue (%)	Male	All	0.0538987	0.147123	SIDIAP	0.366017	0.0753458	1.07277	0.075939
Cancer incidence	First diagnosis of any cancer (%)	Female	[0,5)	0	0.000642	SIDIAP	0	0	15.6971	1
Cancer incidence	First diagnosis of any cancer (%)	Female	[5,10)	0.00254	0.000518	SIDIAP	4.90354	0.118572	30.4889	0.383065
Cancer incidence	First diagnosis of any cancer (%)	Female	[10,15)	0	0.000963	SIDIAP	0	0	10.2161	1
Cancer incidence	First diagnosis of any cancer (%)	Female	[15,20)	0.00254	0.00212	SIDIAP	1.19739	0.0299713	6.85151	1
Cancer incidence	First diagnosis of any cancer (%)	Female	[20,25)	0.00254	0.00531	SIDIAP	0.478961	0.0120708	2.69715	0.768219
Cancer incidence	First diagnosis of any cancer (%)	Female	[25,30)	0.00509	0.0122543	SIDIAP	0.415093	0.0501303	1.50738	0.284207
Cancer incidence	First diagnosis of any cancer (%)	Female	[30,35)	0.0127236	0.0314833	SIDIAP	0.40414	0.130998	0.945599	0.032904
Cancer incidence	First diagnosis of any cancer (%)	Female	[35,40)	0.0305646	0.0818026	SIDIAP	0.373639	0.192866	0.653559	9.38805e-05
Cancer incidence	First diagnosis of any cancer (%)	Female	[40,45)	0.0817296	0.196474	SIDIAP	0.415981	0.28433	0.587732	1.28754e-08
Cancer incidence	First diagnosis of any cancer (%)	Female	[45,50)	0.217385	0.377518	SIDIAP	0.575826	0.459023	0.713392	4.19057e-08
Cancer incidence	First diagnosis of any cancer (%)	Female	[50,55)	0.392297	0.595823	SIDIAP	0.658412	0.545123	0.788389	1.41353e-06
Cancer incidence	First diagnosis of any cancer (%)	Female	[55,60)	0.639418	0.782694	SIDIAP	0.816945	0.674598	0.980578	0.0289183
Cancer incidence	First diagnosis of any cancer (%)	Female	[60,65)	0.913394	1.0748	SIDIAP	0.849824	0.667924	1.06618	0.171094
Cancer incidence	First diagnosis of any cancer (%)	Female	[65,70)	1.10741	1.2718	SIDIAP	0.870737	0.515338	1.37854	0.654914
Cancer incidence	First diagnosis of any cancer (%)	Male	[0,5)	0	0.000393	SIDIAP	0	0	37.9657	1
Cancer incidence	First diagnosis of any cancer (%)	Male	[5,10)	0	0.00054	SIDIAP	0	0	26.7284	1
Cancer incidence	First diagnosis of any cancer (%)	Male	[10,15)	0	0.000785	SIDIAP	0	0	17.889	1
Cancer incidence	First diagnosis of any cancer (%)	Male	[15,20)	0	0.00189	SIDIAP	0	0	7.18441	1
Cancer incidence	First diagnosis of any cancer (%)	Male	[20,25)	0	0.00395	SIDIAP	0	0	3.39259	0.668313
Cancer incidence	First diagnosis of any cancer (%)	Male	[25,30)	0	0.00719	SIDIAP	0	0	1.85408	0.271928
Cancer incidence	First diagnosis of any cancer (%)	Male	[30,35)	0	0.0154771	SIDIAP	0	0	0.858941	0.027338
Cancer incidence	First diagnosis of any cancer (%)	Male	[35,40)	0.0215694	0.036847	SIDIAP	0.585376	0.214479	1.27712	0.231972
Cancer incidence	First diagnosis of any cancer (%)	Male	[40,45)	0.0287986	0.0877232	SIDIAP	0.328289	0.141622	0.647567	0.00024292
Cancer incidence	First diagnosis of any cancer (%)	Male	[45,50)	0.141761	0.199966	SIDIAP	0.708925	0.503729	0.96999	0.0297962
Cancer incidence	First diagnosis of any cancer (%)	Male	[50,55)	0.317497	0.441901	SIDIAP	0.718479	0.558689	0.909887	0.00476491
Cancer incidence	First diagnosis of any cancer (%)	Male	[55,60)	0.540901	0.862519	SIDIAP	0.627118	0.489543	0.791463	2.92864e-05
Cancer incidence	First diagnosis of any cancer (%)	Male	[60,65)	1.25993	1.49189	SIDIAP	0.844517	0.669242	1.05179	0.139249
Cancer incidence	First diagnosis of any cancer (%)	Male	[65,70)	1.92765	1.84962	SIDIAP	1.04219	0.673615	1.54078	0.891038
Cancer incidence	First diagnosis of any cancer (%)	All	All	0.099085	0.148875	SIDIAP	0.665557	0.619073	0.714616	3.30592e-33
Cancer incidence	First diagnosis of any cancer (%)	Female	All	0.10341	0.163042	SIDIAP	0.634253	0.577806	0.694742	4.45147e-26
Cancer incidence	First diagnosis of any cancer (%)	Male	All	0.0930021	0.134781	SIDIAP	0.690026	0.613734	0.773206	1.28475e-11

## Sheet: Table S6
Table S6. Table of the comparison results in medication between GCAT cohort and general population of Catalonia.
Variable	Value	Sex	Age	GCAT	General Population	Source	OR	CI 95% lower	CI 95% upper	p-value
Drug use prevalence	A02 - Drugs for acid related disorders (%)	Female	All	55.1856	48.8757	SIDIAP	1.28807	1.23157	1.34727	7.91578e-29
Drug use prevalence	A02 - Drugs for acid related disorders (%)	Male	All	47.7003	40.4821	SIDIAP	1.34091	1.27153	1.41409	2.22157e-27
Drug use prevalence	A03 - Drugs for functional gastrointestinal disorders (%)	Female	All	21.8861	21.0945	SIDIAP	1.04805	0.992681	1.10608	0.0877348
Drug use prevalence	A03 - Drugs for functional gastrointestinal disorders (%)	Male	All	13.6543	12.509	SIDIAP	1.10601	1.02293	1.19456	0.0110585
Drug use prevalence	A07 - Antidiarrheals, intestinal antiinflammatory/antiinfective agents (%)	Female	All	7.60041	9.34789	SIDIAP	0.797658	0.732402	0.867474	5.41676e-08
Drug use prevalence	A07 - Antidiarrheals, intestinal antiinflammatory/antiinfective agents (%)	Male	All	6.09055	6.76555	SIDIAP	0.893756	0.798147	0.998084	0.0474052
Drug use prevalence	A10 - Drugs used in diabetes (%)	Female	All	3.63498	7.18164	SIDIAP	0.487548	0.431584	0.548855	2.69111e-40
Drug use prevalence	A10 - Drugs used in diabetes (%)	Male	All	7.00683	12.04	SIDIAP	0.550465	0.495248	0.610376	5.32127e-35
Drug use prevalence	A11 - Vitamins (%)	Female	All	21.365	16.1343	SIDIAP	1.41228	1.33694	1.49125	1.50519e-33
Drug use prevalence	A11 - Vitamins (%)	Male	All	5.83902	4.57331	SIDIAP	1.29392	1.15266	1.44829	1.38232e-05
Drug use prevalence	A12 - Mineral supplements (%)	Female	All	14.0188	13.0588	SIDIAP	1.08553	1.01734	1.15744	0.0128628
Drug use prevalence	A12 - Mineral supplements (%)	Male	All	2.19188	2.30819	SIDIAP	0.94848	0.785608	1.13563	0.591074
Drug use prevalence	B01 - Antithrombotic agents (%)	Female	All	22.8902	16.2539	SIDIAP	1.52949	1.44985	1.61291	8.86912e-52
Drug use prevalence	B01 - Antithrombotic agents (%)	Male	All	23.41	19.0527	SIDIAP	1.2986	1.21929	1.38242	9.23029e-16
Drug use prevalence	B03 - Antianemic preparations (%)	Female	All	24.0595	17.5068	SIDIAP	1.49287	1.41648	1.57293	4.02537e-48
Drug use prevalence	B03 - Antianemic preparations (%)	Male	All	8.53396	6.24283	SIDIAP	1.40123	1.27227	1.54045	2.0107e-11
Drug use prevalence	C03 - Diuretics (%)	Female	All	8.93493	11.4928	SIDIAP	0.755601	0.698076	0.816851	2.5892e-13
Drug use prevalence	C03 - Diuretics (%)	Male	All	7.59971	9.88789	SIDIAP	0.749575	0.677027	0.828058	3.84263e-09
Drug use prevalence	C07 - Beta blocking agents (%)	Female	All	7.04118	8.57984	SIDIAP	0.807062	0.738707	0.880324	6.96416e-07
Drug use prevalence	C07 - Beta blocking agents (%)	Male	All	8.04887	11.2666	SIDIAP	0.689402	0.624376	0.759645	2.98637e-15
Drug use prevalence	C08 - Calcium channel blockers (%)	Female	All	3.90188	5.79256	SIDIAP	0.660335	0.586966	0.740568	4.57731e-14
Drug use prevalence	C08 - Calcium channel blockers (%)	Male	All	7.49192	9.2951	SIDIAP	0.79027	0.71334	0.873682	2.23065e-06
Drug use prevalence	C09 - Agents acting on the renin-angiotensin system (%)	Female	All	15.5186	20.2683	SIDIAP	0.722615	0.679103	0.76839	5.13559e-27
Drug use prevalence	C09 - Agents acting on the renin-angiotensin system (%)	Male	All	26.5181	28.3086	SIDIAP	0.913927	0.860371	0.970415	0.00311224
Drug use prevalence	C10 - Lipid modifying agents (%)	Female	All	18.8231	20.8894	SIDIAP	0.878145	0.829109	0.92961	5.86715e-06
Drug use prevalence	C10 - Lipid modifying agents (%)	Male	All	23.1944	25.959	SIDIAP	0.861344	0.808601	0.917063	2.27443e-06
Drug use prevalence	D01 - Antifungals for dermatological use (%)	Female	All	25.5592	22.2262	SIDIAP	1.20147	1.14122	1.26445	3.34901e-12
Drug use prevalence	D01 - Antifungals for dermatological use (%)	Male	All	20.9666	16.8349	SIDIAP	1.31053	1.22725	1.3986	1.61264e-15
Drug use prevalence	D06 - Antibiotics and chemotherapeutics for dermatological use (%)	Female	All	17.5648	14.7296	SIDIAP	1.23348	1.16272	1.30788	5.62019e-12
Drug use prevalence	D06 - Antibiotics and chemotherapeutics for dermatological use (%)	Male	All	12.6123	10.0491	SIDIAP	1.29187	1.19151	1.39903	8.71987e-10
Drug use prevalence	D07 - Corticosteroids, dermatological preparations (%)	Female	All	30.5669	27.4375	SIDIAP	1.16424	1.10898	1.22201	9.39854e-10
Drug use prevalence	D07 - Corticosteroids, dermatological preparations (%)	Male	All	22.9788	19.3261	SIDIAP	1.24539	1.16877	1.32629	1.69637e-11
Drug use prevalence	G01 - Gynecological antiinfectives and antiseptics (%)	Female	All	13.7646	11.8132	SIDIAP	1.19155	1.11608	1.27114	1.70964e-07
Drug use prevalence	G01 - Gynecological antiinfectives and antiseptics (%)	Male	All	0.844413	0.70874	SIDIAP	1.19305	0.87451	1.59093	0.228672
Drug use prevalence	G03 - Sex hormones and modulators of the genital system (%)	Female	All	12.7478	8.99584	SIDIAP	1.47801	1.3813	1.58015	5.89935e-28
Drug use prevalence	G03 - Sex hormones and modulators of the genital system (%)	Male	All	0.790514	0.558918	SIDIAP	1.41763	1.02737	1.90887	0.0298358
Drug use prevalence	G04 - Urologicals (%)	Female	All	4.47382	3.21081	SIDIAP	1.41176	1.26412	1.57237	2.22906e-09
Drug use prevalence	G04 - Urologicals (%)	Male	All	15.8282	10.8784	SIDIAP	1.54058	1.43149	1.65656	7.01241e-29
Drug use prevalence	H02 - Corticosteroids for systemic use (%)	Female	All	25.6101	21.8323	SIDIAP	1.23261	1.17086	1.29725	2.50357e-15
Drug use prevalence	H02 - Corticosteroids for systemic use (%)	Male	All	18.7747	15.0967	SIDIAP	1.29994	1.21388	1.39114	1.30359e-13
Drug use prevalence	H03 - Thyroid therapy (%)	Female	All	11.2862	10.9671	SIDIAP	1.03281	0.961758	1.1081	0.364825
Drug use prevalence	H03 - Thyroid therapy (%)	Male	All	2.10205	1.99223	SIDIAP	1.05634	0.871333	1.26959	0.563388
Drug use prevalence	J01 - Antibacterials for systemic use (%)	Female	All	74.0849	66.6327	SIDIAP	1.43156	1.36061	1.50668	4.43974e-46
Drug use prevalence	J01 - Antibacterials for systemic use (%)	Male	All	62.6482	55.6864	SIDIAP	1.3347	1.26356	1.41018	1.0394e-25
Drug use prevalence	M01 - Antiinflammatory and antirheumatic products (%)	Female	All	77.8851	70.0079	SIDIAP	1.50881	1.43	1.59257	5.43437e-55
Drug use prevalence	M01 - Antiinflammatory and antirheumatic products (%)	Male	All	69.673	59.3202	SIDIAP	1.57547	1.4873	1.66949	3.09861e-57
Drug use prevalence	M03 - Muscle relaxants (%)	Female	All	22.9792	18.573	SIDIAP	1.30802	1.24004	1.37921	2.46753e-22
Drug use prevalence	M03 - Muscle relaxants (%)	Male	All	13.7981	11.1911	SIDIAP	1.27023	1.17514	1.37152	2.61544e-09
Drug use prevalence	M04 - Antigout preparations (%)	Female	All	1.09304	1.266	SIDIAP	0.861864	0.687961	1.06682	0.187138
Drug use prevalence	M04 - Antigout preparations (%)	Male	All	5.89292	6.35265	SIDIAP	0.923099	0.822839	1.03263	0.167864
Drug use prevalence	M05 - Drugs for treatment of bone diseases (%)	Female	All	5.8846	5.85922	SIDIAP	1.0046	0.912187	1.10415	0.92314
Drug use prevalence	M05 - Drugs for treatment of bone diseases (%)	Male	All	0.610852	0.606037	SIDIAP	1.00799	0.696525	1.41222	0.930856
Drug use prevalence	N02 - Analgesics (%)	Female	All	70.4245	65.5769	SIDIAP	1.2499	1.19039	1.31279	8.43233e-20
Drug use prevalence	N02 - Analgesics (%)	Male	All	62.774	55.1752	SIDIAP	1.36995	1.29686	1.44746	2.76749e-30
Drug use prevalence	N03 - Antiepileptics (%)	Female	All	18.2511	16.1711	SIDIAP	1.15731	1.09192	1.22605	9.24826e-07
Drug use prevalence	N03 - Antiepileptics (%)	Male	All	12.8279	11.6076	SIDIAP	1.12057	1.03419	1.21277	0.00523612
Drug use prevalence	N05 - Psycholeptics (%)	Female	All	52.1352	49.4544	SIDIAP	1.11325	1.0646	1.16416	2.29886e-06
Drug use prevalence	N05 - Psycholeptics (%)	Male	All	35.0341	31.7115	SIDIAP	1.16127	1.09826	1.22765	1.43059e-07
Drug use prevalence	N06 - Psychoanaleptics (%)	Female	All	32.3589	30.9216	SIDIAP	1.06872	1.0188	1.12091	0.00627931
Drug use prevalence	N06 - Psychoanaleptics (%)	Male	All	16.9062	15.088	SIDIAP	1.145	1.06613	1.22874	0.000199212
Drug use prevalence	N07 - Other nervous system drugs (%)	Female	All	13.4596	13.3313	SIDIAP	1.01112	0.946554	1.07925	0.738932
Drug use prevalence	N07 - Other nervous system drugs (%)	Male	All	7.77937	7.07231	SIDIAP	1.1084	1.00216	1.22335	0.0434001
Drug use prevalence	R01 - Nasal preparations (%)	Female	All	26.9573	21.1189	SIDIAP	1.37848	1.31053	1.44952	1.61551e-34
Drug use prevalence	R01 - Nasal preparations (%)	Male	All	23.1405	15.0909	SIDIAP	1.69399	1.59	1.80384	1.06003e-55
Drug use prevalence	R03 - Drugs for obstructive airway diseases (%)	Female	All	26.8302	27.0027	SIDIAP	0.991268	0.942379	1.04238	0.740112
Drug use prevalence	R03 - Drugs for obstructive airway diseases (%)	Male	All	18.8645	19.5396	SIDIAP	0.957408	0.894172	1.02436	0.209426
Drug use prevalence	R05 - Cough and cold preparations (%)	Female	All	10.8541	10.7468	SIDIAP	1.0112	0.940432	1.08619	0.755878
Drug use prevalence	R05 - Cough and cold preparations (%)	Male	All	7.79734	6.94887	SIDIAP	1.13243	1.02399	1.24975	0.0149703
Drug use prevalence	R06 - Antihistamines for systemic use (%)	Female	All	46.8607	39.5215	SIDIAP	1.34944	1.29038	1.41124	2.0863e-39
Drug use prevalence	R06 - Antihistamines for systemic use (%)	Male	All	35.1958	26.6298	SIDIAP	1.49637	1.41526	1.58183	1.81391e-44
Drug use prevalence	S01 - Ophthalmologicals (%)	Female	All	30.5541	26.8976	SIDIAP	1.19571	1.13897	1.25505	6.95796e-13
Drug use prevalence	S01 - Ophthalmologicals (%)	Male	All	22.35	19.8347	SIDIAP	1.16335	1.0911	1.23963	3.81381e-06
Drug use prevalence	S02 - Otologicals (%)	Female	All	12.303	10.1731	SIDIAP	1.23874	1.1565	1.3257	1.43501e-09
Drug use prevalence	S02 - Otologicals (%)	Male	All	10.8696	8.20794	SIDIAP	1.36381	1.25086	1.48474	5.54227e-12
Drug prescriptions per person	A02 - Drugs for acid related disorders [Mean (SD)]	Female	All	13.34 (25.3)	18.71 (30.42)	SIDIAP				6.55216e-43
Drug prescriptions per person	A02 - Drugs for acid related disorders [Mean (SD)]	Male	All	13.28 (25.46)	18.83 (30.33)	SIDIAP				2.69673e-28
Drug prescriptions per person	A03 - Drugs for functional gastrointestinal disorders [Mean (SD)]	Female	All	3.64 (11.58)	4.11 (12.64)	SIDIAP				0.0940648
Drug prescriptions per person	A03 - Drugs for functional gastrointestinal disorders [Mean (SD)]	Male	All	2.73 (6.82)	3.25 (10.93)	SIDIAP				0.036651
Drug prescriptions per person	A07 - Antidiarrheals, intestinal antiinflammatory/antiinfective agents [Mean (SD)]	Female	All	5.21 (14.14)	5.31 (16.53)	SIDIAP				0.861803
Drug prescriptions per person	A07 - Antidiarrheals, intestinal antiinflammatory/antiinfective agents [Mean (SD)]	Male	All	6.74 (20.18)	6.62 (20.5)	SIDIAP				0.909529
Drug prescriptions per person	A10 - Drugs used in diabetes [Mean (SD)]	Female	All	51.07 (61.29)	74.83 (77.43)	SIDIAP				2.95118e-10
Drug prescriptions per person	A10 - Drugs used in diabetes [Mean (SD)]	Male	All	68.91 (69.48)	77.94 (75.74)	SIDIAP				0.010759
Drug prescriptions per person	A11 - Vitamins [Mean (SD)]	Female	All	6.55 (14.71)	6.95 (17)	SIDIAP				0.260214
Drug prescriptions per person	A11 - Vitamins [Mean (SD)]	Male	All	7.36 (16.91)	8.74 (22.66)	SIDIAP				0.147674
Drug prescriptions per person	A12 - Mineral supplements [Mean (SD)]	Female	All	15.69 (21.62)	15.78 (21.55)	SIDIAP				0.887254
Drug prescriptions per person	A12 - Mineral supplements [Mean (SD)]	Male	All	14.29 (22.69)	13.24 (22.51)	SIDIAP				0.614036
Drug prescriptions per person	B01 - Antithrombotic agents [Mean (SD)]	Female	All	5.74 (14.75)	16.16 (28.98)	SIDIAP				1.471e-156
Drug prescriptions per person	B01 - Antithrombotic agents [Mean (SD)]	Male	All	11.82 (23.28)	31.81 (37.37)	SIDIAP				2.06162e-157
Drug prescriptions per person	B03 - Antianemic preparations [Mean (SD)]	Female	All	7.19 (12.01)	9.14 (15.09)	SIDIAP				4.30154e-12
Drug prescriptions per person	B03 - Antianemic preparations [Mean (SD)]	Male	All	6.91 (15.96)	9.97 (17.84)	SIDIAP				3.81696e-05
Drug prescriptions per person	C03 - Diuretics [Mean (SD)]	Female	All	31.32 (39.08)	34.94 (41.32)	SIDIAP				0.0145112
Drug prescriptions per person	C03 - Diuretics [Mean (SD)]	Male	All	31.19 (37.02)	32.9 (40.57)	SIDIAP				0.343962
Drug prescriptions per person	C07 - Beta blocking agents [Mean (SD)]	Female	All	23.92 (30.93)	30.35 (34.31)	SIDIAP				1.45323e-06
Drug prescriptions per person	C07 - Beta blocking agents [Mean (SD)]	Male	All	28.04 (31.6)	37.59 (39.26)	SIDIAP				4.59597e-10
Drug prescriptions per person	C08 - Calcium channel blockers [Mean (SD)]	Female	All	22.75 (28.93)	29.81 (32.5)	SIDIAP				2.73648e-05
Drug prescriptions per person	C08 - Calcium channel blockers [Mean (SD)]	Male	All	33.85 (37.57)	35.2 (34.61)	SIDIAP				0.465229
Drug prescriptions per person	C09 - Agents acting on the renin-angiotensin system [Mean (SD)]	Female	All	45.87 (38.05)	46.1 (38.75)	SIDIAP				0.833545
Drug prescriptions per person	C09 - Agents acting on the renin-angiotensin system [Mean (SD)]	Male	All	51.22 (38.25)	48.92 (39.61)	SIDIAP				0.0214789
Drug prescriptions per person	C10 - Lipid modifying agents [Mean (SD)]	Female	All	37.92 (34.4)	40.26 (35.61)	SIDIAP				0.00930603
Drug prescriptions per person	C10 - Lipid modifying agents [Mean (SD)]	Male	All	45.39 (38.14)	45.97 (40.2)	SIDIAP				0.587752
Drug prescriptions per person	D01 - Antifungals for dermatological use [Mean (SD)]	Female	All	3.4 (5.65)	3.92 (8.28)	SIDIAP				5.77002e-05
Drug prescriptions per person	D01 - Antifungals for dermatological use [Mean (SD)]	Male	All	4.25 (8.55)	4.33 (9.76)	SIDIAP				0.727727
Drug prescriptions per person	D06 - Antibiotics and chemotherapeutics for dermatological use [Mean (SD)]	Female	All	1.64 (2.02)	1.8 (3.19)	SIDIAP				0.00419183
Drug prescriptions per person	D06 - Antibiotics and chemotherapeutics for dermatological use [Mean (SD)]	Male	All	1.7 (2.05)	1.8 (3.58)	SIDIAP				0.202858
Drug prescriptions per person	D07 - Corticosteroids, dermatological preparations [Mean (SD)]	Female	All	2.74 (5.67)	3.02 (7.18)	SIDIAP				0.0155957
Drug prescriptions per person	D07 - Corticosteroids, dermatological preparations [Mean (SD)]	Male	All	3.14 (9.74)	3.5 (9.42)	SIDIAP				0.180015
Drug prescriptions per person	G01 - Gynecological antiinfectives and antiseptics [Mean (SD)]	Female	All	2.12 (2.17)	2.28 (3.05)	SIDIAP				0.0164593
Drug prescriptions per person	G01 - Gynecological antiinfectives and antiseptics [Mean (SD)]	Male	All	1.49 (1.21)	1.43 (1.92)	SIDIAP				0.740851
Drug prescriptions per person	G03 - Sex hormones and modulators of the genital system [Mean (SD)]	Female	All	10.38 (16.7)	10.02 (16.89)	SIDIAP				0.499033
Drug prescriptions per person	G03 - Sex hormones and modulators of the genital system [Mean (SD)]	Male	All	12.77 (22.18)	22.12 (32.6)	SIDIAP				0.00817946
Drug prescriptions per person	G04 - Urologicals [Mean (SD)]	Female	All	12.59 (26.29)	12.86 (23.26)	SIDIAP				0.850949
Drug prescriptions per person	G04 - Urologicals [Mean (SD)]	Male	All	24.2 (32.56)	23.87 (32.48)	SIDIAP				0.768175
Drug prescriptions per person	H02 - Corticosteroids for systemic use [Mean (SD)]	Female	All	2.3 (3.86)	4.04 (11.81)	SIDIAP				1.49018e-77
Drug prescriptions per person	H02 - Corticosteroids for systemic use [Mean (SD)]	Male	All	2.54 (6.31)	4.02 (11.82)	SIDIAP				1.70817e-13
Drug prescriptions per person	H03 - Thyroid therapy [Mean (SD)]	Female	All	22.17 (12.92)	21.14 (13.71)	SIDIAP				0.0178635
Drug prescriptions per person	H03 - Thyroid therapy [Mean (SD)]	Male	All	20.18 (13.04)	17.91 (13.92)	SIDIAP				0.0627747
Drug prescriptions per person	J01 - Antibacterials for systemic use [Mean (SD)]	Female	All	5.14 (6.68)	5.06 (7.6)	SIDIAP				0.374449
Drug prescriptions per person	J01 - Antibacterials for systemic use [Mean (SD)]	Male	All	4.04 (6.45)	4 (7.04)	SIDIAP				0.765712
Drug prescriptions per person	M01 - Antiinflammatory and antirheumatic products [Mean (SD)]	Female	All	10.02 (15.75)	9.71 (16.76)	SIDIAP				0.132236
Drug prescriptions per person	M01 - Antiinflammatory and antirheumatic products [Mean (SD)]	Male	All	6.62 (11.95)	6.12 (12.22)	SIDIAP				0.0100538
Drug prescriptions per person	M03 - Muscle relaxants [Mean (SD)]	Female	All	2.46 (7.66)	3.21 (15.13)	SIDIAP				4.52768e-05
Drug prescriptions per person	M03 - Muscle relaxants [Mean (SD)]	Male	All	1.87 (3.22)	3.49 (20.75)	SIDIAP				1.42247e-31
Drug prescriptions per person	M04 - Antigout preparations [Mean (SD)]	Female	All	6.53 (9.86)	13.27 (20.3)	SIDIAP				1.43185e-08
Drug prescriptions per person	M04 - Antigout preparations [Mean (SD)]	Male	All	19.94 (24.22)	22.05 (25.84)	SIDIAP				0.118053
Drug prescriptions per person	M05 - Drugs for treatment of bone diseases [Mean (SD)]	Female	All	19.42 (18.59)	18.3 (18.54)	SIDIAP				0.196666
Drug prescriptions per person	M05 - Drugs for treatment of bone diseases [Mean (SD)]	Male	All	17.29 (19.99)	17.67 (20.22)	SIDIAP				0.914571
Drug prescriptions per person	N02 - Analgesics [Mean (SD)]	Female	All	15.22 (36.59)	18.2 (40.54)	SIDIAP				1.82551e-09
Drug prescriptions per person	N02 - Analgesics [Mean (SD)]	Male	All	9.06 (29.82)	10.96 (29.01)	SIDIAP				0.000173618
Drug prescriptions per person	N03 - Antiepileptics [Mean (SD)]	Female	All	15.62 (30.05)	20.9 (44.53)	SIDIAP				6.75364e-11
Drug prescriptions per person	N03 - Antiepileptics [Mean (SD)]	Male	All	13.97 (27)	22.1 (50.01)	SIDIAP				7.33257e-15
Drug prescriptions per person	N05 - Psycholeptics [Mean (SD)]	Female	All	22.5 (46.89)	30.32 (56.99)	SIDIAP				5.69041e-26
Drug prescriptions per person	N05 - Psycholeptics [Mean (SD)]	Male	All	17.23 (40.79)	24.71 (55.62)	SIDIAP				1.39921e-15
Drug prescriptions per person	N06 - Psychoanaleptics [Mean (SD)]	Female	All	39.48 (48.5)	34.61 (44.24)	SIDIAP				4.73647e-07
Drug prescriptions per person	N06 - Psychoanaleptics [Mean (SD)]	Male	All	29.25 (41.37)	26.83 (39.95)	SIDIAP				0.073106
Drug prescriptions per person	N07 - Other nervous system drugs [Mean (SD)]	Female	All	3.56 (11.89)	5.01 (15.55)	SIDIAP				9.29701e-05
Drug prescriptions per person	N07 - Other nervous system drugs [Mean (SD)]	Male	All	4.91 (20.31)	5.49 (16.19)	SIDIAP				0.553919
Drug prescriptions per person	R01 - Nasal preparations [Mean (SD)]	Female	All	4.05 (9.02)	3.6 (7.77)	SIDIAP				0.0209694
Drug prescriptions per person	R01 - Nasal preparations [Mean (SD)]	Male	All	4.08 (8.02)	4.37 (9.83)	SIDIAP				0.203475
Drug prescriptions per person	R03 - Drugs for obstructive airway diseases [Mean (SD)]	Female	All	10.35 (27.96)	13.8 (37.41)	SIDIAP				2.25453e-08
Drug prescriptions per person	R03 - Drugs for obstructive airway diseases [Mean (SD)]	Male	All	13.1 (31.73)	18.26 (44.99)	SIDIAP				1.91931e-07
Drug prescriptions per person	R05 - Cough and cold preparations [Mean (SD)]	Female	All	1.46 (1.39)	1.56 (2.25)	SIDIAP				0.0409502
Drug prescriptions per person	R05 - Cough and cold preparations [Mean (SD)]	Male	All	1.47 (1.28)	1.61 (2.96)	SIDIAP				0.0237497
Drug prescriptions per person	R06 - Antihistamines for systemic use [Mean (SD)]	Female	All	6.71 (17.03)	6.68 (17.2)	SIDIAP				0.906955
Drug prescriptions per person	R06 - Antihistamines for systemic use [Mean (SD)]	Male	All	6 (15.57)	5.31 (14.16)	SIDIAP				0.0497902
Drug prescriptions per person	S01 - Ophthalmologicals [Mean (SD)]	Female	All	8.09 (21.11)	9.11 (25.49)	SIDIAP				0.0189777
Drug prescriptions per person	S01 - Ophthalmologicals [Mean (SD)]	Male	All	9.29 (24.4)	9.35 (27.41)	SIDIAP				0.929567
Drug prescriptions per person	S02 - Otologicals [Mean (SD)]	Female	All	1.62 (1.44)	1.69 (1.8)	SIDIAP				0.149125
Drug prescriptions per person	S02 - Otologicals [Mean (SD)]	Male	All	1.71 (2.35)	1.64 (1.79)	SIDIAP				0.473777

## Sheet: Table S7
Table S7. Comparison between GCAT included individuals and the ones excluded due to the EHR-link filter.
	No EHR link N = 7511	Included GCAT N = 13,4341	p-value2
Sex			0.081
Female	62	59
Male	38	41
Birth range			0.1
1951_1955	16	16
1956_1960	26	23
1961_1965	28	31
1966_1970	30	30
Deprivation index			0.4
Inferior [-2.58,-0.87]	47	47
Intermediate low [-0.86,-0.28]	28	28
Intermediate [-0.27,0.21]	12	14
Intermediate high [0.22,0.82]	11	9
Superior [0.83,4.88]	2	2.4
Rurality			0.3
Rural	0.9	1.4
Urban	99	99
Education level			0.5
Primary or less	13	13
Secondary 1	10	11
Secondary 2	26	27
Higher	51	48
Civil status			0.3
Single	11	9.3
Married	72	74
Separated/Divorced	13	14
Widowed	4	3.4
Employment status			0.054
Employed	68	71
Inactive	19	18
Unemployed	13	10
Occupation status			0.094
Working	68	71
Retired	8.2	7.1
Home duties	5.8	6.5
Incapacity	2.2	2.4
Unemployed	15	13
Smoking habit			0.5
Ex-smoker	43	43
Non smoker	39	38
Smoker	18	20
Alcohol			0.2
High risk	2.8	4
Low risk	75	75
Non drinker	22	21
Household size			0.14
1	12	10
2	31	28
3	25	27
4	25	28
5+	6.4	6.3
BMI			0.8
Underweight	0.1	0.2
Normal weight	32	30
Overweight	42	43
Obesity	26	27
Self-perceived health-status			0.4
Very good	18	15
Good	70	73
Regular	11	11
Bad or very bad	0.8	0.9
1 %
2 Pearson’s Chi-squared test; Fisher’s exact test

## Sheet: Table S8
Table S8. Lifetime disease prevalence of a selection of diseases (three-digit ICD-10 codes) in SIDIAP and GCAT individuals (subset with no missing data, N=13,018) before (Unweighted) and after weighting (Weighted), and their difference with the general population. 95% confidence intervals are included.
ICD10	Description	Genral Population	Unweighted				Weighted
		%	%	Difference	CI 95% Lower	CI 95% Upper	%	Difference	CI 95% Lower	CI 95% Upper
E11	Type 2 diabetes mellitus	10.3538	5.00077	-5.35303	4.63574	5.39261	6.81923	-3.53457	6.39509	7.26906
E66	Overweight and obesity	26.3717	26.0716	-0.300113	25.3208	26.8366	28.2629	1.89124	27.4921	29.0466
E78	Disorders of lipoprotein metabolism and other lipidemias	33.0089	31.3182	-1.6907	30.5233	32.1242	32.9663	-0.0426052	32.1601	33.7826
F10	Alcohol related disorders	4.79393	1.37502	-3.41891	1.18527	1.59401	2.11906	-2.67487	1.8818	2.38501
F17	Nicotine dependence	29.5829	21.9773	-7.60562	21.2705	22.7007	22.6075	-6.9754	21.8933	23.3379
F32	Major depressive disorder, single episode	11.1874	11.4687	0.281313	10.9289	12.0314	11.3383	0.150919	10.8013	11.8984
F41	Other anxiety disorders	26.8335	27.8614	1.02789	27.0941	28.6419	26.9566	0.123041	26.1974	27.7294
G43	Migraine	5.18985	6.67537	1.48552	6.25554	7.12099	6.25346	1.0636	5.84658	6.68638
I10	Essential (primary) hypertension	27.0015	21.4395	-5.56198	20.7392	22.1568	23.7071	-3.29441	22.9806	24.4492
I20	Angina pectoris	0.872698	0.468582	-0.404116	0.361627	0.60571	0.797132	-0.075566	0.654748	0.969273
I25	Chronic ischemic heart disease	1.66078	0.59917	-1.06161	0.476975	0.751352	0.71131	-0.949475	0.577324	0.875146
I48	Atrial fibrillation and flutter	1.5603	0.806576	-0.753722	0.663296	0.979602	0.932522	-0.627775	0.777775	1.11689
I50	Heart failure	0.811163	0.153633	-0.657529	0.0964651	0.241851	0.343231	-0.467932	0.253081	0.463786
I63	Cerebral infarction	1.34474	0.41481	-0.929928	0.314748	0.545137	0.817762	-0.526976	0.673428	0.99183
I70	Atherosclerosis	0.600342	0.576125	-0.0242162	0.456488	0.725779	0.647152	0.0468108	0.519786	0.804444
J30	Vasomotor and allergic rhinitis	10.4438	12.2907	1.84685	11.734	12.8698	11.4996	1.05575	10.9591	12.0629
J44	Other chronic obstructive pulmonary disease	3.33849	1.56706	-1.77143	1.36397	1.79924	1.98798	-1.35051	1.75836	2.24638
J45	Asthma	4.87885	5.0699	0.191051	4.70242	5.46417	5.09689	0.218036	4.72845	5.49209
L40	Psoriasis	3.18305	3.32616	0.143111	3.02797	3.65224	3.3361	0.15305	3.03746	3.66262
M81	Osteoporosis without current pathological fracture	3.4284	3.67184	0.243443	3.35852	4.01282	3.73121	0.302816	3.41537	4.07467

## Sheet: Table S9
Table S9. Table of the comparison in smoking habit between SIDIAP, ESCA and two sources of the GCAT cohort (questionnaire and EHR).
	SIDIAP	ESCA	GCAT
			Questionnaire	EHR
N	1383633	1427	13381	10231
Smoker (%)	28.21	29.3	19.8	17.48
Ex-smoker (%)	26.22	21.77	42.62	27.58
Non-smoker (%)	45.57	48.92	37.58	54.94
